# Supplementary material for: Microwave-assisted chemoselective synthesis and photophysical properties of 2-arylazo-biphenyl-4-carboxamides from hydrazonals
Source: Royal Society of Chemistry journal article supplement (doi:10.1039/d3ra04558g), 2023-01-01
Supplement: d3ra04558g1.pdf [file d3ra04558g1.pdf]

## Supporting Information on

# Microwave-Assisted Chemoselective Synthesis and Photophysical Properties of 2-arylaazo-biphenyl-4-carboxamides from Hydrazonals

Abdulrahman M. Alazemi,<sup>1,\*</sup> Kamal M. Dawood,<sup>2,\*</sup> Hamad M. Al-Matar,<sup>1</sup> and Wael M. Tohamy<sup>1,3</sup>

<sup>1</sup> Chemistry Department, Faculty of Science, University of Kuwait, P.O. Box 5969, Safat 13060, Kuwait

\*Corresponding author 1: fax: +965 24816482, E-mail: a.alazmi@ku.edu.kw (A.M. Alazemi).

<sup>2</sup> Department of Chemistry, Faculty of Science, Cairo University, Giza 12613, Egypt

\*Corresponding author 2: fax: +202 35727556; E-mail: kmdawood@sci.cu.edu.eg (K.M. Dawood)

<sup>3</sup> Organometallic and Organometalloid Chemistry Department, National Research Centre, Cairo, Egypt; wael\_tohamy79@hotmail.com

### Table of Contents:

|     |                                                    |     |
|-----|----------------------------------------------------|-----|
| 1.  | <sup>1</sup> H NMR spectrum of compound <b>3a</b>  | S4  |
| 2.  | <sup>13</sup> C NMR spectrum of compound <b>3a</b> | S5  |
| 3.  | HRMS spectrum of compound <b>3a</b>                | S5  |
| 4.  | FT-IR spectrum of compound <b>3a</b>               | S6  |
| 5.  | <sup>1</sup> H NMR spectrum of compound <b>3b</b>  | S7  |
| 6.  | <sup>13</sup> C NMR spectrum of compound <b>3b</b> | S8  |
| 7.  | HRMS spectrum of compound <b>3b</b>                | S8  |
| 8.  | FT-IR spectrum of compound <b>3b</b>               | S9  |
| 9.  | <sup>1</sup> H NMR spectrum of compound <b>3c</b>  | S10 |
| 10. | <sup>13</sup> C NMR spectrum of compound <b>3c</b> | S11 |
| 11. | FT-IR spectrum of compound <b>3c</b>               | S12 |
| 12. | <sup>1</sup> H NMR spectrum of compound <b>3d</b>  | S13 |
| 13. | <sup>13</sup> C NMR spectrum of compound <b>3d</b> | S14 |
| 14. | HRMS spectrum of compound <b>3d</b>                | S15 |

|                                                        |     |
|--------------------------------------------------------|-----|
| 15. FT-IR spectrum of compound <b>3d</b>               | S16 |
| 16. <sup>1</sup> H NMR spectrum of compound <b>3e</b>  | S17 |
| 17. <sup>13</sup> C NMR spectrum of compound <b>3e</b> | S18 |
| 18. <sup>1</sup> H NMR spectrum of compound <b>3f</b>  | S19 |
| 19. <sup>13</sup> C NMR spectrum of compound <b>3f</b> | S20 |
| 20. FT-IR spectrum of compound <b>3f</b>               | S21 |
| 21. <sup>1</sup> H NMR spectrum of compound <b>3g</b>  | S22 |
| 22. <sup>13</sup> C NMR spectrum of compound <b>3g</b> | S23 |
| 23. Mass spectrum of compound <b>3g</b>                | S24 |
| 24. HRMS spectrum of compound <b>3g</b>                | S24 |
| 25. FT-IR spectrum of compound <b>3g</b>               | S25 |
| 26. <sup>1</sup> H NMR spectrum of compound <b>3i</b>  | S26 |
| 27. <sup>13</sup> C NMR spectrum of compound <b>3i</b> | S27 |
| 28. HRMS spectrum of compound <b>3i</b>                | S27 |
| 29. FT-IR spectrum of compound <b>3i</b>               | S28 |
| 30. <sup>1</sup> H NMR spectrum of compound <b>3j</b>  | S29 |
| 31. <sup>13</sup> C NMR spectrum of compound <b>3j</b> | S30 |
| 32. FT-IR spectrum of compound <b>3j</b>               | S31 |
| 33. <sup>1</sup> H NMR spectrum of compound <b>3k</b>  | S32 |
| 34. <sup>13</sup> C NMR spectrum of compound <b>3k</b> | S33 |
| 35. <sup>1</sup> H NMR spectrum of compound <b>3l</b>  | S34 |
| 36. <sup>13</sup> C NMR spectrum of compound <b>3l</b> | S35 |
| 37. <sup>1</sup> H NMR spectrum of compound <b>3m</b>  | S36 |
| 38. <sup>13</sup> C NMR spectrum of compound <b>3m</b> | S37 |
| 39. FT-IR spectrum of compound <b>3m</b>               | S38 |
| 40. <sup>1</sup> H NMR spectrum of compound <b>3n</b>  | S39 |
| 41. <sup>13</sup> C NMR spectrum of compound <b>3n</b> | S40 |
| 42. HRMS spectrum of compound <b>3n</b>                | S40 |
| 43. FT-IR spectrum of compound <b>3n</b>               | S41 |
| 44. <sup>1</sup> H NMR spectrum of compound <b>3o</b>  | S42 |
| 45. <sup>13</sup> C NMR spectrum of compound <b>3o</b> | S43 |
| 46. HRMS spectrum of compound <b>3o</b>                | S43 |
| 47. <sup>1</sup> H NMR spectrum of compound <b>4a</b>  | S44 |

|     |                                                    |     |
|-----|----------------------------------------------------|-----|
| 48. | <sup>13</sup> C NMR spectrum of compound <b>4a</b> | S45 |
| 49. | <sup>1</sup> H NMR spectrum of compound <b>4b</b>  | S46 |
| 50. | <sup>13</sup> C NMR spectrum of compound <b>4b</b> | S47 |
| 51. | <sup>1</sup> H NMR spectrum of compound <b>4c</b>  | S48 |
| 52. | <sup>13</sup> C NMR spectrum of compound <b>4c</b> | S49 |
| 53. | <sup>1</sup> H NMR spectrum of compound <b>4d</b>  | S50 |
| 54. | FT-IR spectrum of compound <b>4d</b>               | S51 |
| 55. | <sup>1</sup> H NMR spectrum of compound <b>4e</b>  | S52 |
| 56. | <sup>1</sup> H NMR spectrum of compound <b>4f</b>  | S53 |
| 57. | <sup>13</sup> C NMR spectrum of compound <b>4f</b> | S54 |
| 58. | <sup>1</sup> H NMR spectrum of compound <b>4g</b>  | S55 |
| 59. | <sup>13</sup> C NMR spectrum of compound <b>4g</b> | S56 |
| 60. | <sup>1</sup> H NMR spectrum of compound <b>4h</b>  | S57 |
| 61. | <sup>13</sup> C NMR spectrum of compound <b>4h</b> | S58 |
| 62. | <sup>1</sup> H NMR spectrum of compound <b>4i</b>  | S59 |
| 63. | <sup>13</sup> C NMR spectrum of compound <b>4i</b> | S60 |
| 64. | <sup>1</sup> H NMR spectrum of compound <b>4j</b>  | S61 |
| 65. | <sup>13</sup> C NMR spectrum of compound <b>4j</b> | S62 |
| 66. | <sup>1</sup> H NMR spectrum of compound <b>4k</b>  | S63 |
| 67. | <sup>13</sup> C NMR spectrum of compound <b>4k</b> | S64 |
| 68. | <sup>1</sup> H NMR spectrum of compound <b>4l</b>  | S65 |
| 69. | <sup>13</sup> C NMR spectrum of compound <b>4l</b> | S66 |
| 70. | <sup>1</sup> H NMR spectrum of compound <b>4m</b>  | S67 |
| 71. | <sup>13</sup> C NMR spectrum of compound <b>4m</b> | S68 |
| 72. | <sup>1</sup> H NMR spectrum of compound <b>4n</b>  | S69 |
| 73. | <sup>13</sup> C NMR spectrum of compound <b>4n</b> | S70 |
| 74. | FT-IR spectrum of compound <b>4n</b>               | S71 |
| 75. | <sup>1</sup> H NMR spectrum of compound <b>4o</b>  | S72 |
| 76. | <sup>13</sup> C NMR spectrum of compound <b>4o</b> | S73 |
| 77. | FT-IR spectrum of compound <b>4o</b>               | S74 |

**2-(4-Bromophenylazo)-5-hydroxy-4'-nitro-N-phenyl-[1,1'-biphenyl]-4-carboxamide (3a)**

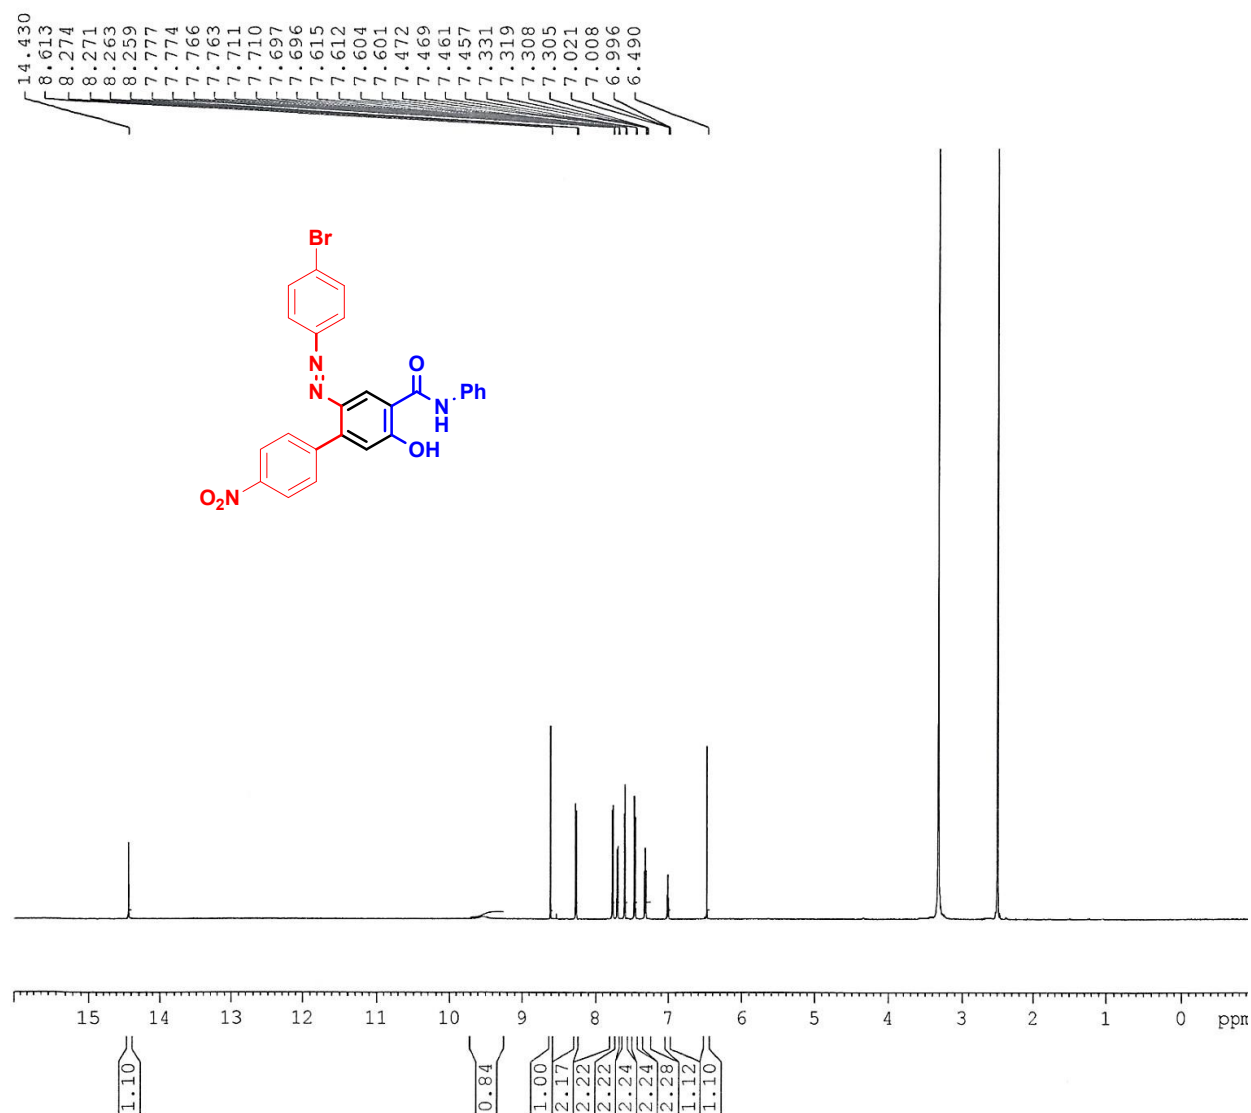

**<sup>1</sup>H NMR spectrum of compound 3a**

## 2-(4-Bromophenylazo)-5-hydroxy-4'-nitro-N-phenyl-[1,1'-biphenyl]-4-carboxamide (3a)

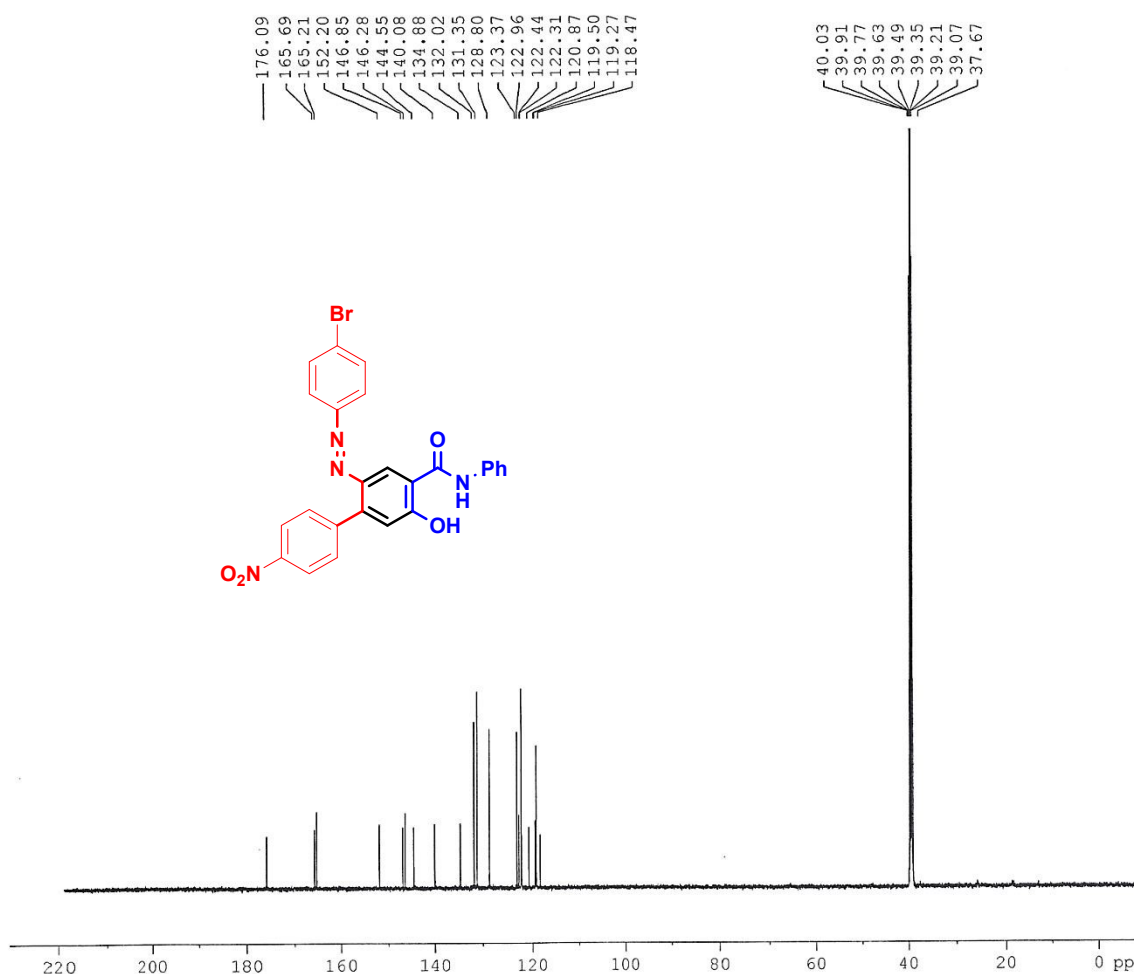

## <sup>13</sup>C NMR spectrum of compound 3a

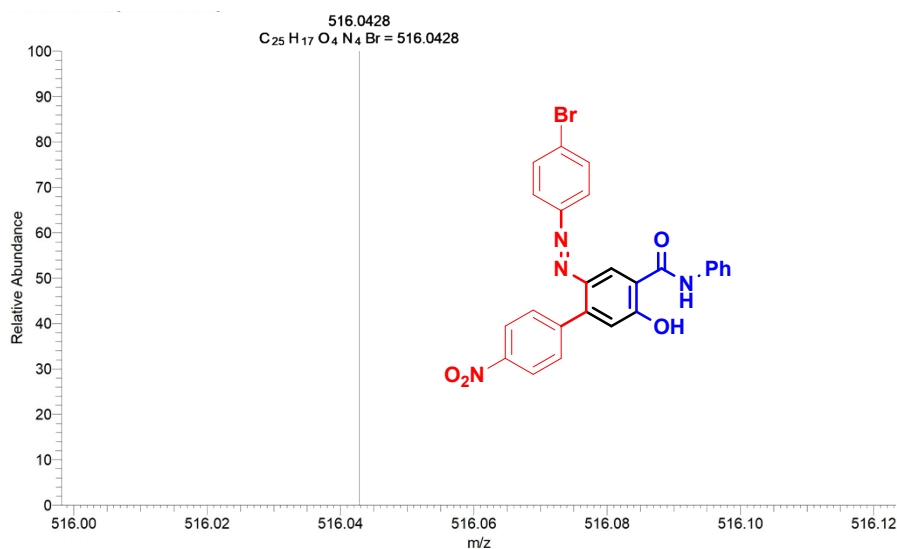

## HRMS spectrum of compound 3a

## 2-(4-Bromophenylazo)-5-hydroxy-4'-nitro-N-phenyl-[1,1'-biphenyl]-4-carboxamide (3a)

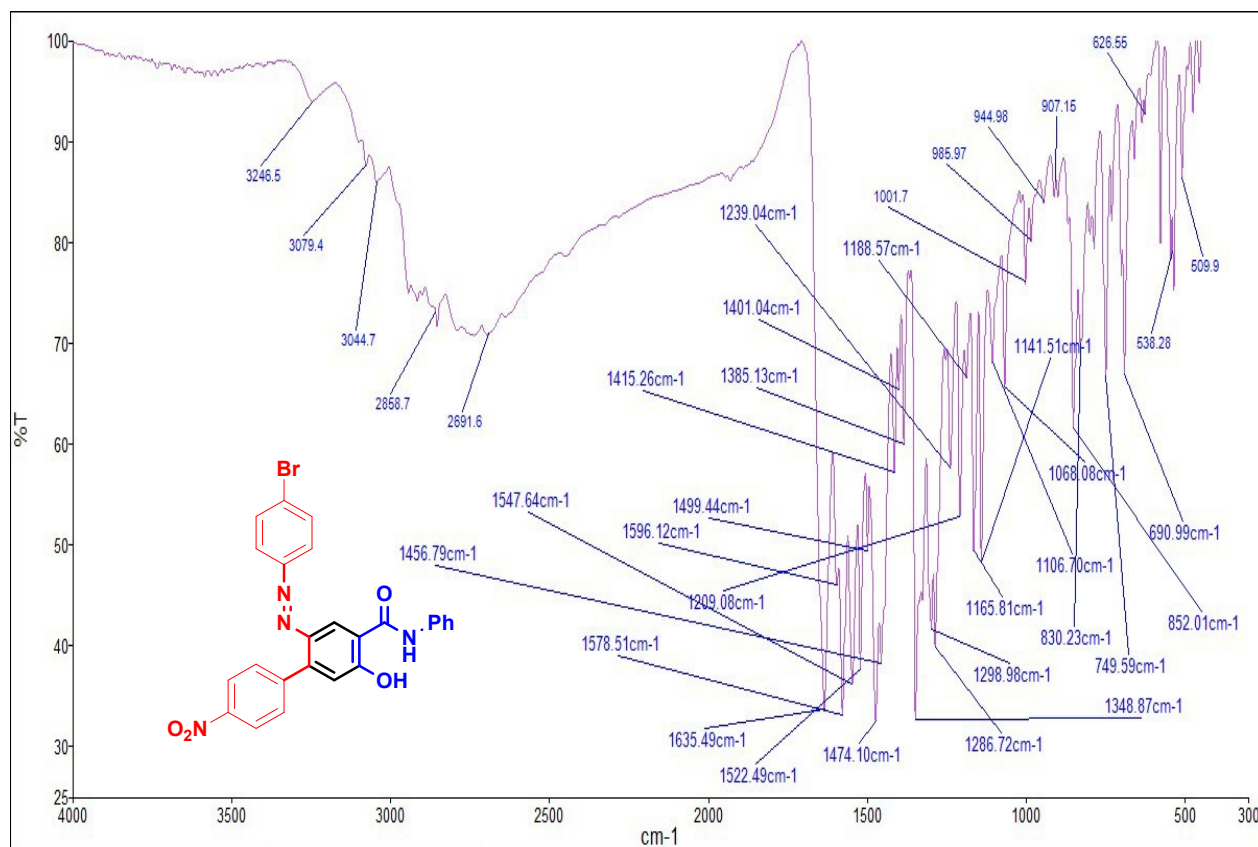

FT-IR spectrum of compound 3a

**2-(4-Chlorophenylazo)-5-hydroxy-4'-nitro-N-phenyl-[1,1'-biphenyl]-4-carboxamide (3b)**

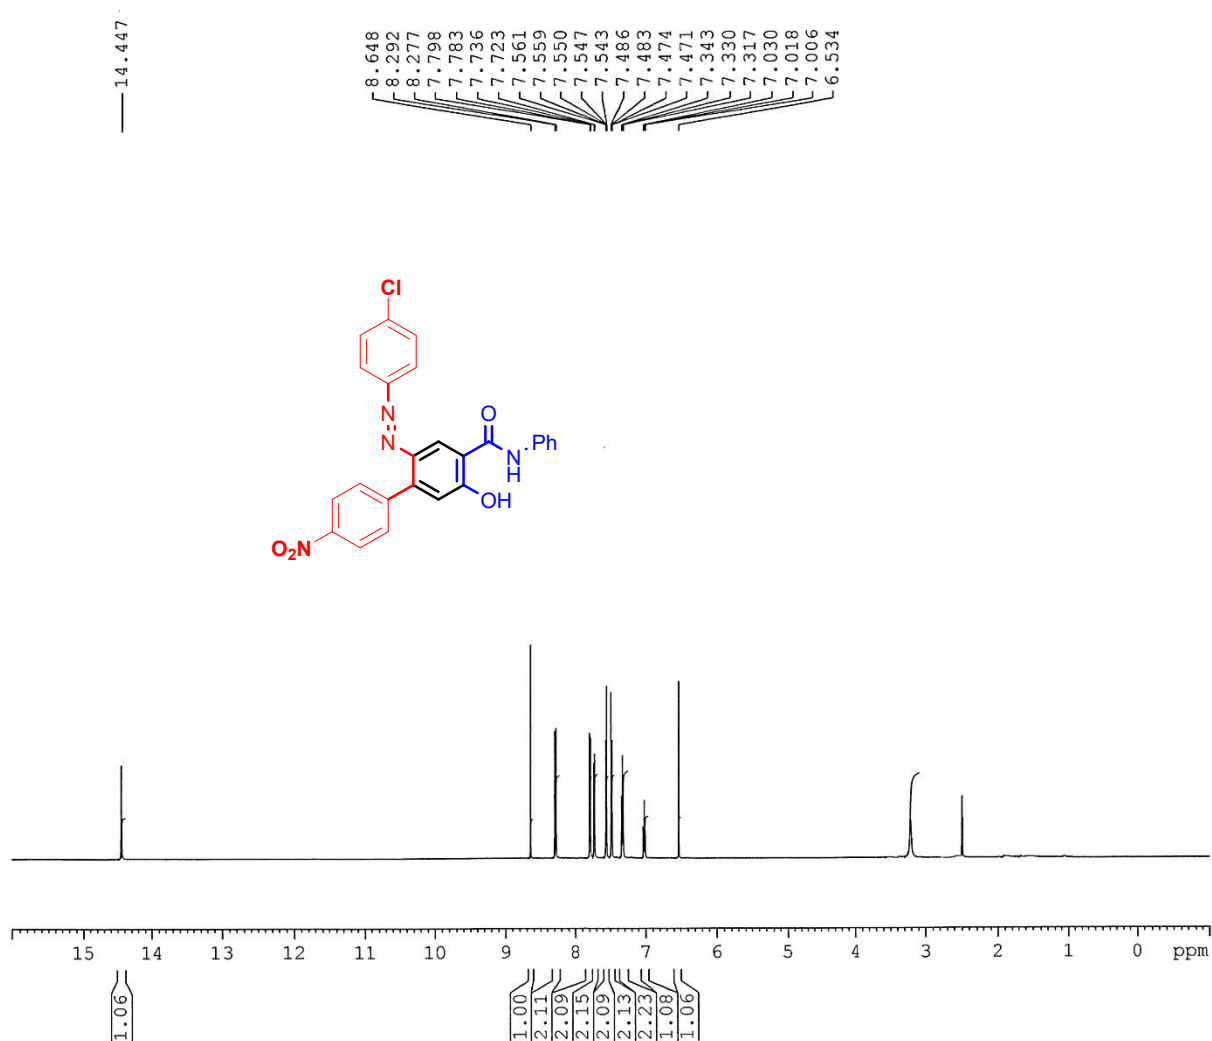

**<sup>1</sup>H NMR spectrum of compound 3b**

## 2-(4-Chlorophenylazo)-5-hydroxy-4'-nitro-N-phenyl-[1,1'-biphenyl]-4-carboxamide (3b)

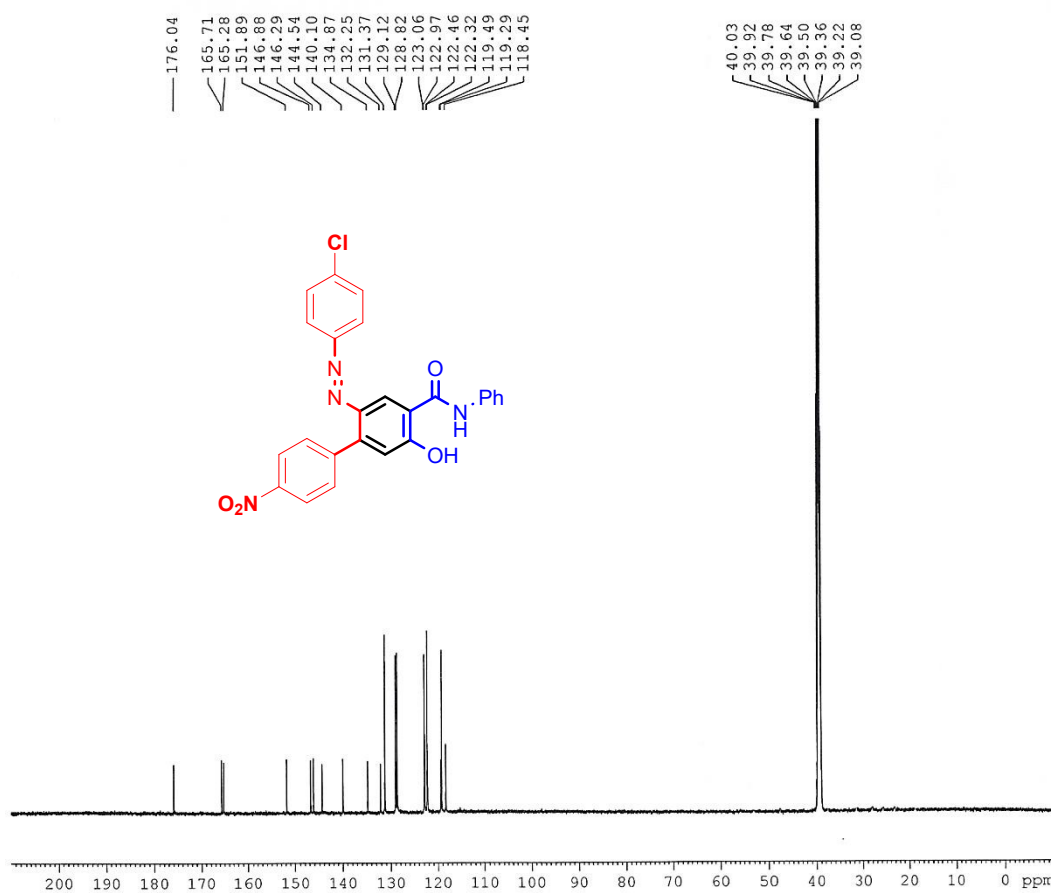

<sup>13</sup>C NMR spectrum of compound 3b

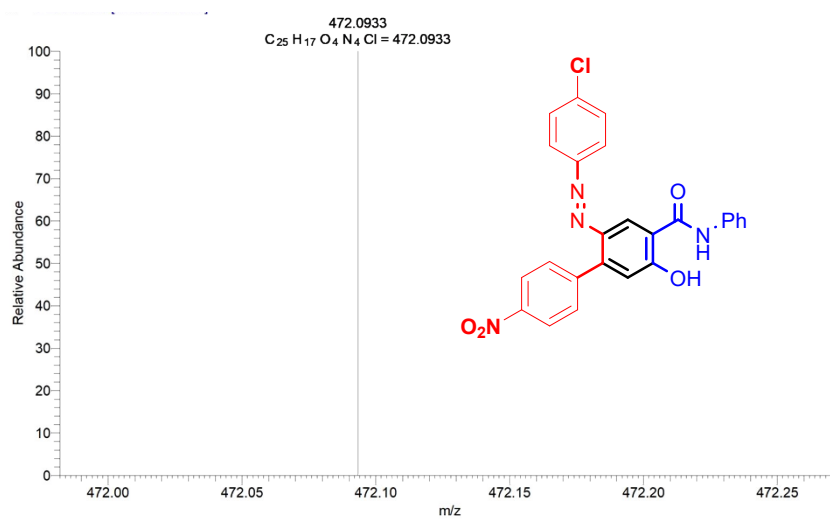

HRMS spectrum of compound 3b

**2-(4-Chlorophenylazo)-5-hydroxy-4'-nitro-N-phenyl-[1,1'-biphenyl]-4-carboxamide (3b)**

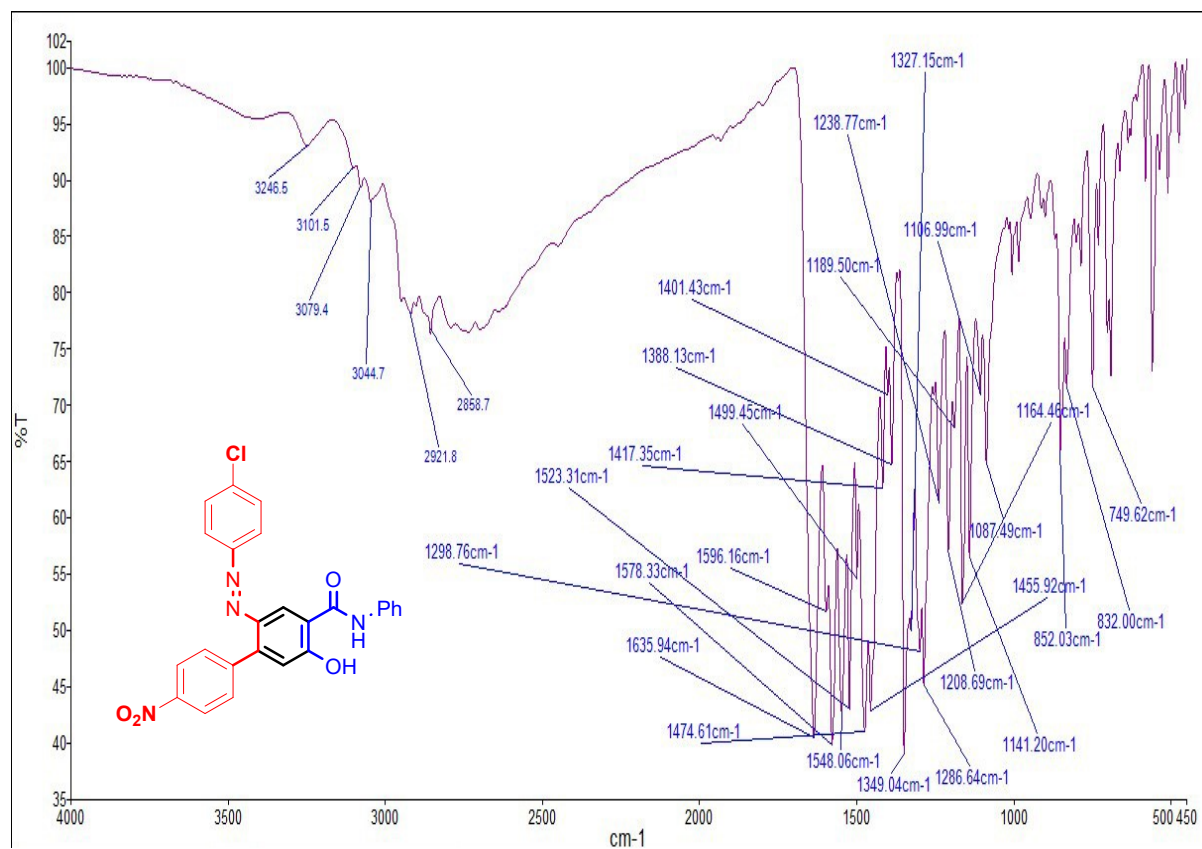

**FT-IR spectrum of compound 3b**

**2-(3-Chlorophenylazo)-5-hydroxy-4'-nitro-N-phenyl-[1,1'-biphenyl]-4-carboxamide (3c)**

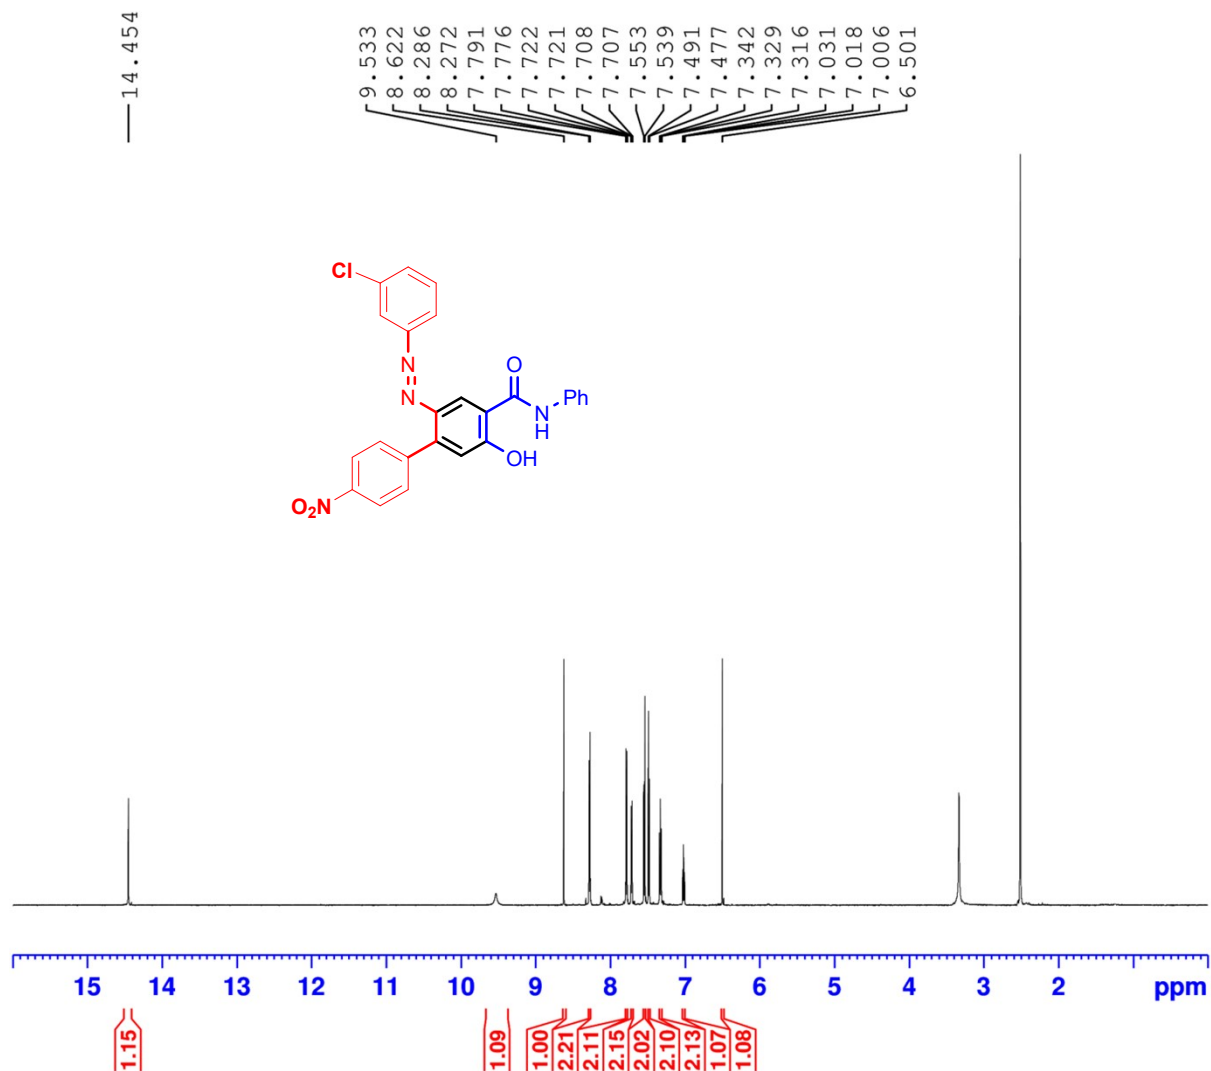

**<sup>1</sup>H NMR spectrum of compound 3c**

**2-(3-Chlorophenylazo)-5-hydroxy-4'-nitro-N-phenyl-[1,1'-biphenyl]-4-carboxamide (3c)**

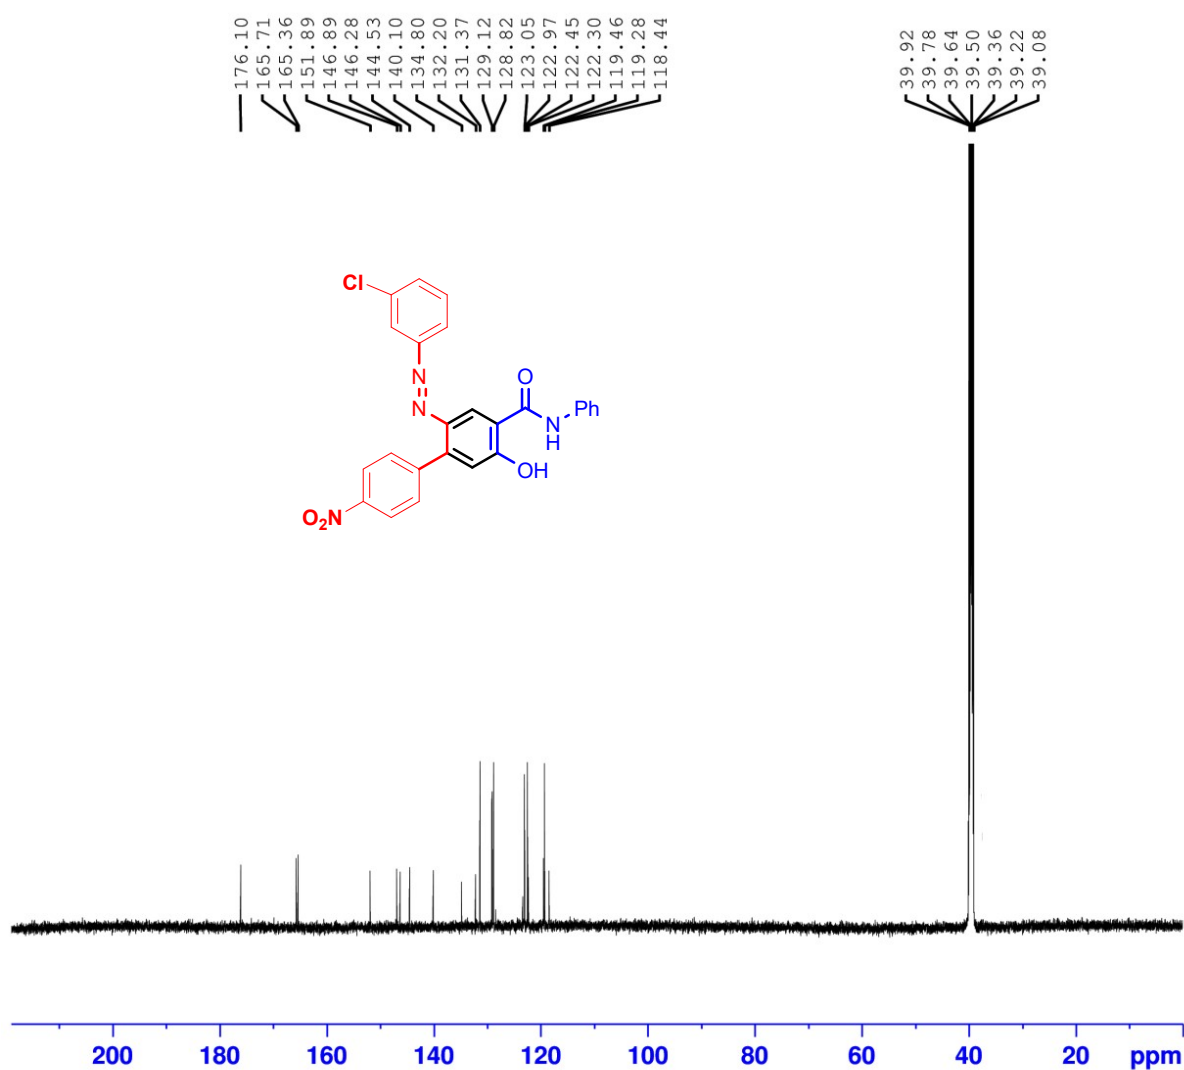

$^{13}\text{C}$  NMR spectrum of compound 3c

**2-(3-Chlorophenylazo)-5-hydroxy-4'-nitro-N-phenyl-[1,1'-biphenyl]-4-carboxamide (3c)**

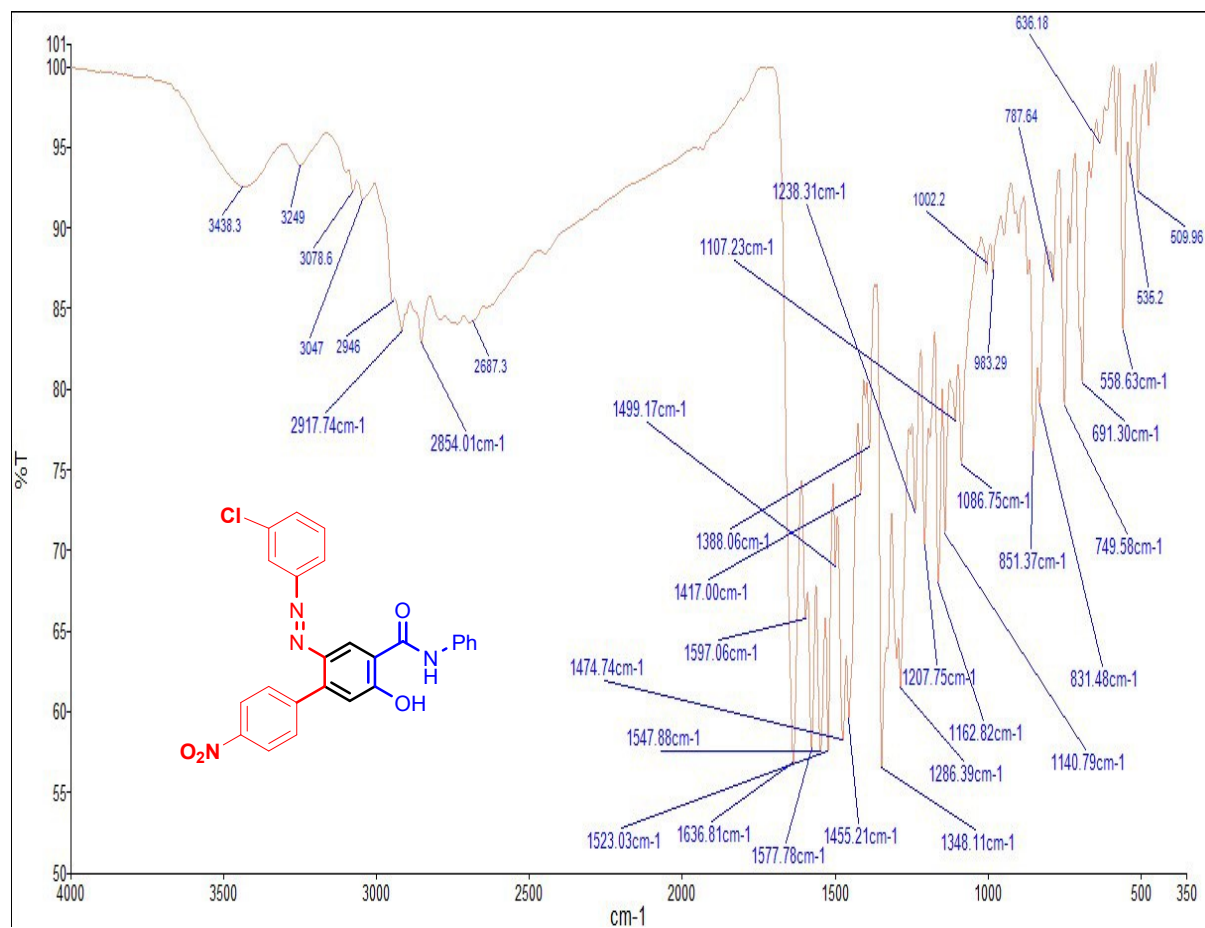

**FT-IR spectrum of compound 3c**

**5-Hydroxy-2-(4-nitrophenylazo)-N-phenyl-[1,1'-biphenyl]-4-carboxamide (3d)**

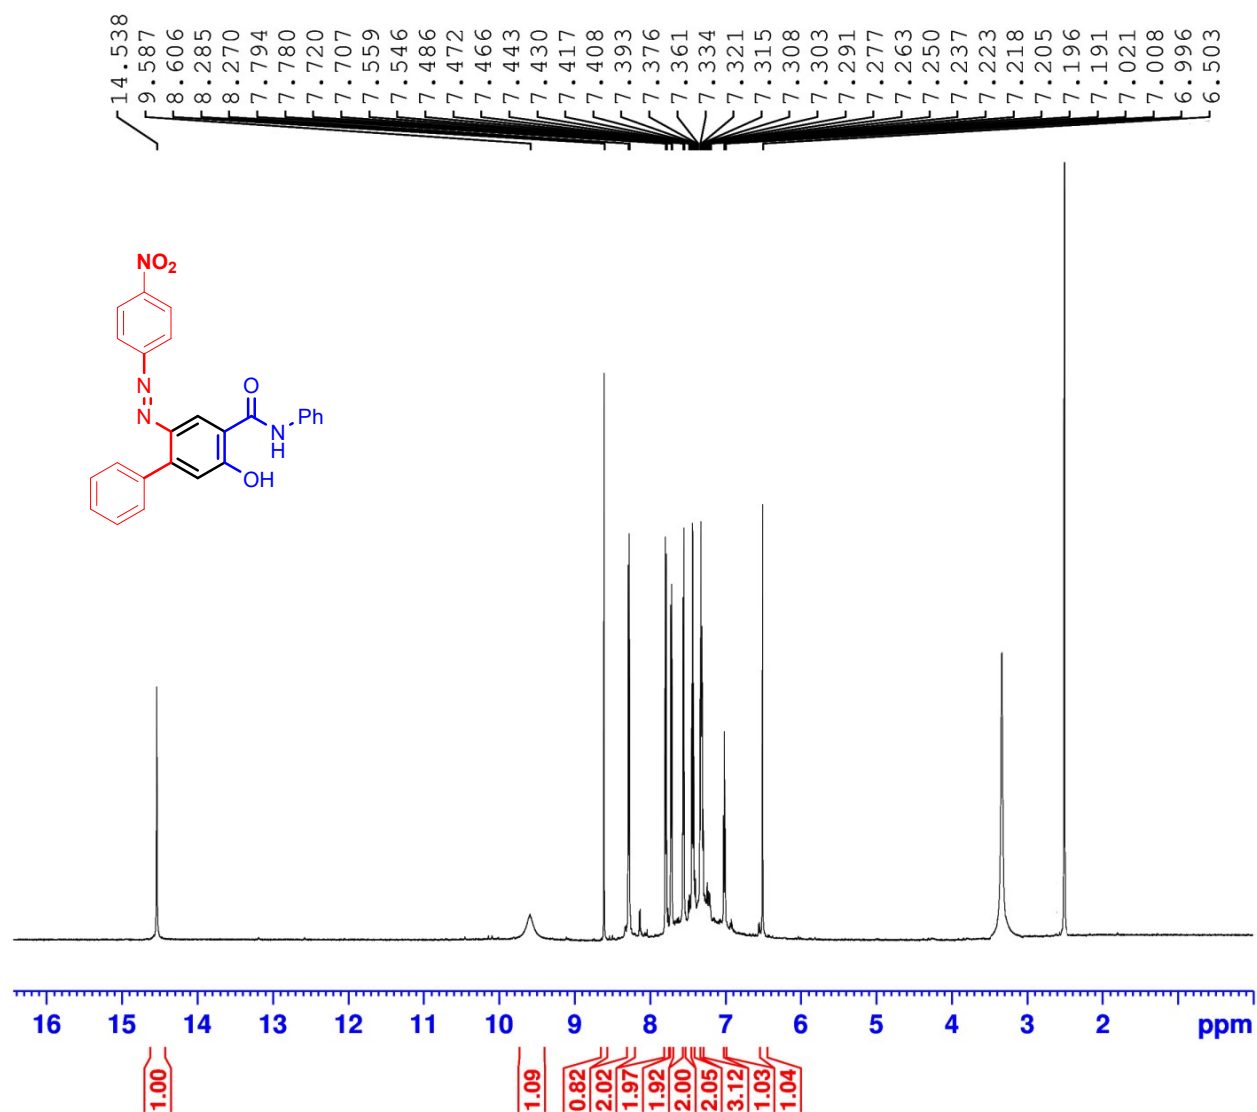

**<sup>1</sup>H NMR spectrum of compound 3d**

**5-Hydroxy-2-(4-nitrophenylazo)-N-phenyl-[1,1'-biphenyl]-4-carboxamide (3d)**

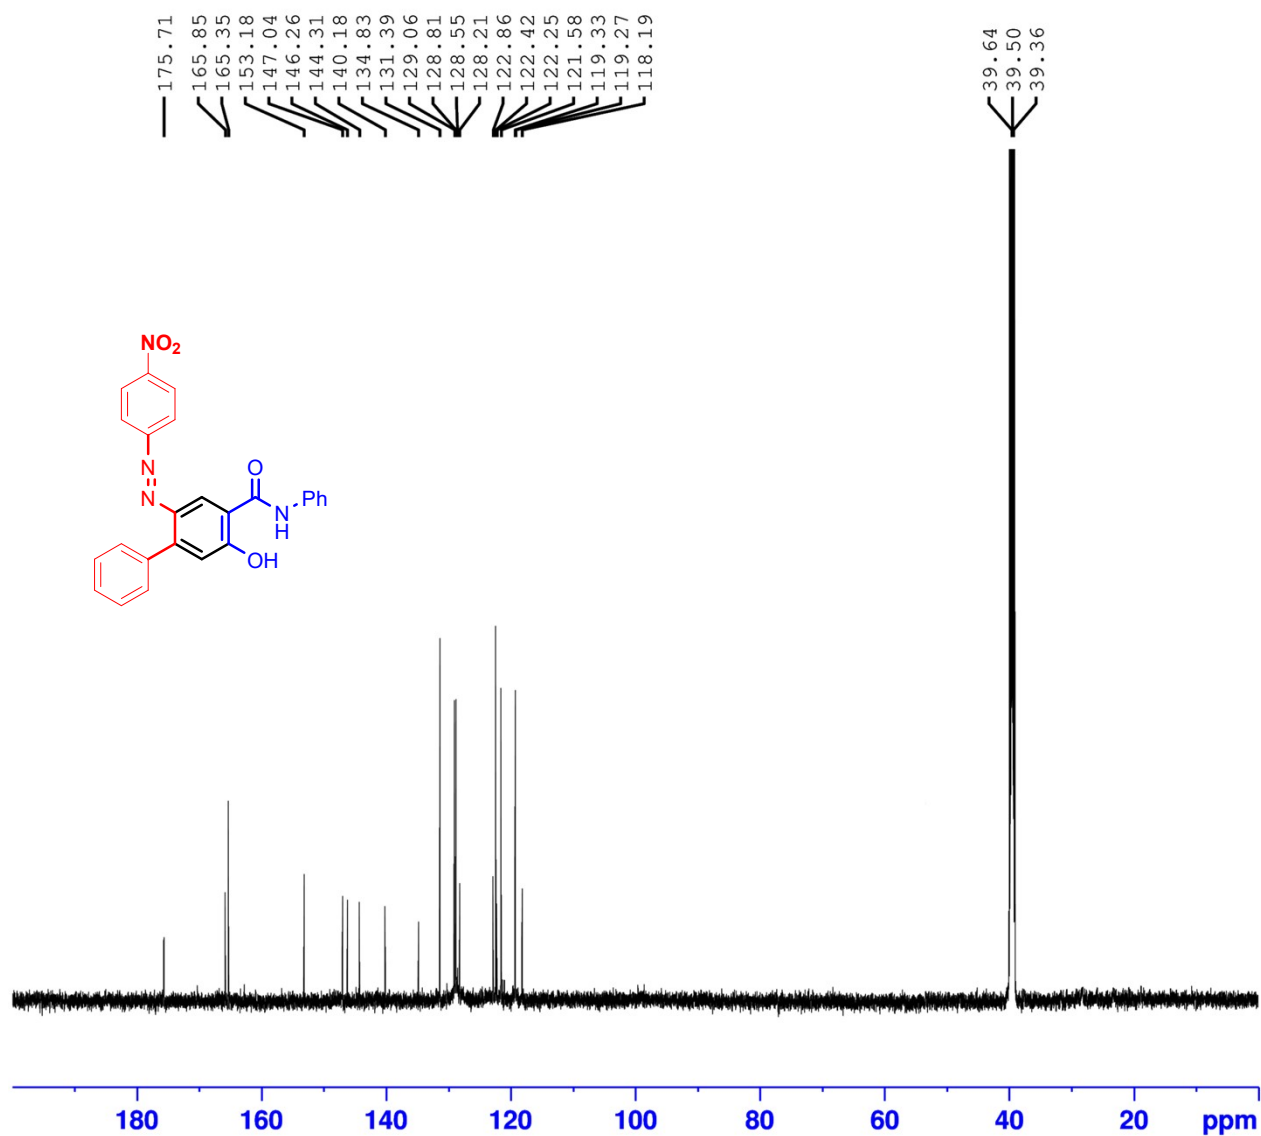

**<sup>13</sup>C NMR spectrum of compound 3d**

**5-Hydroxy-2-(4-nitrophenylazo)-N-phenyl-[1,1'-biphenyl]-4-carboxamide (3d)**

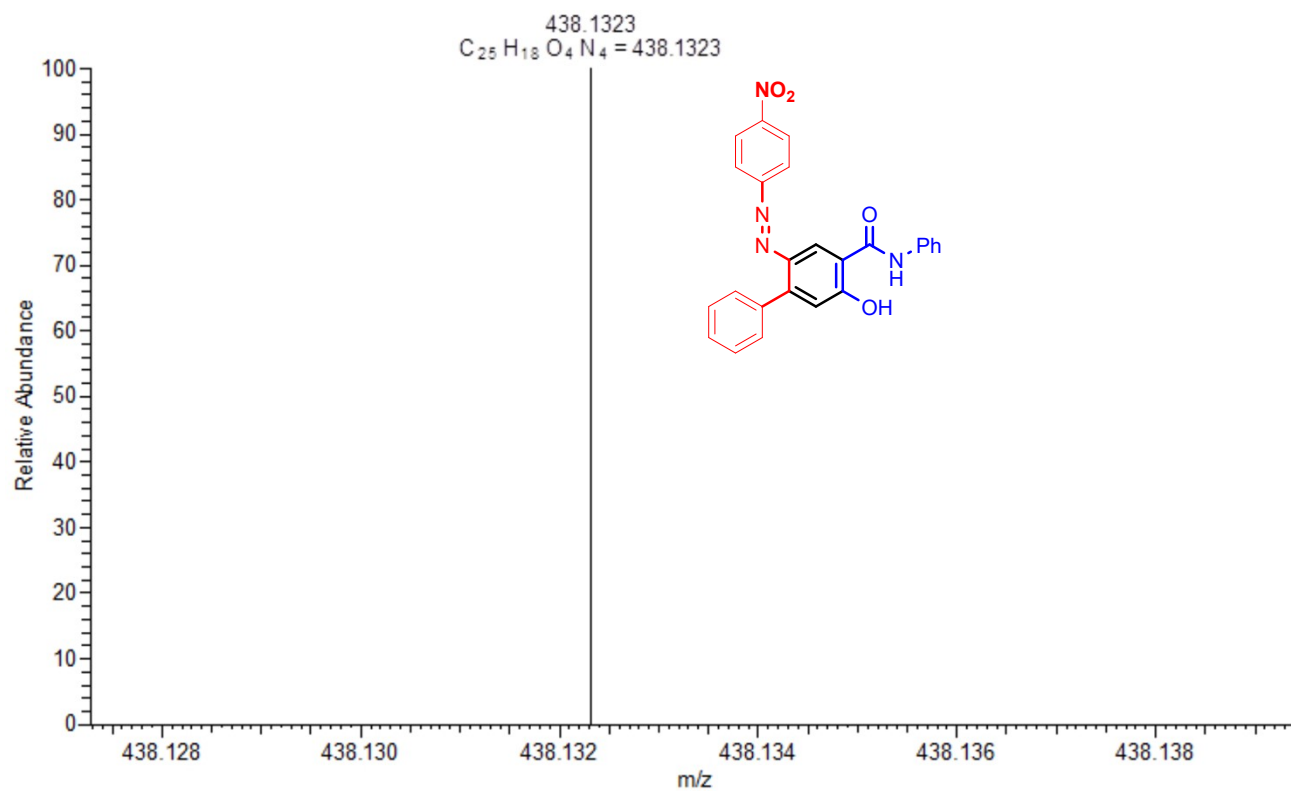

**HRMS spectrum of compound 3d**

**5-Hydroxy-2-(4-nitrophenylazo)-N-phenyl-[1,1'-biphenyl]-4-carboxamide (3d)**

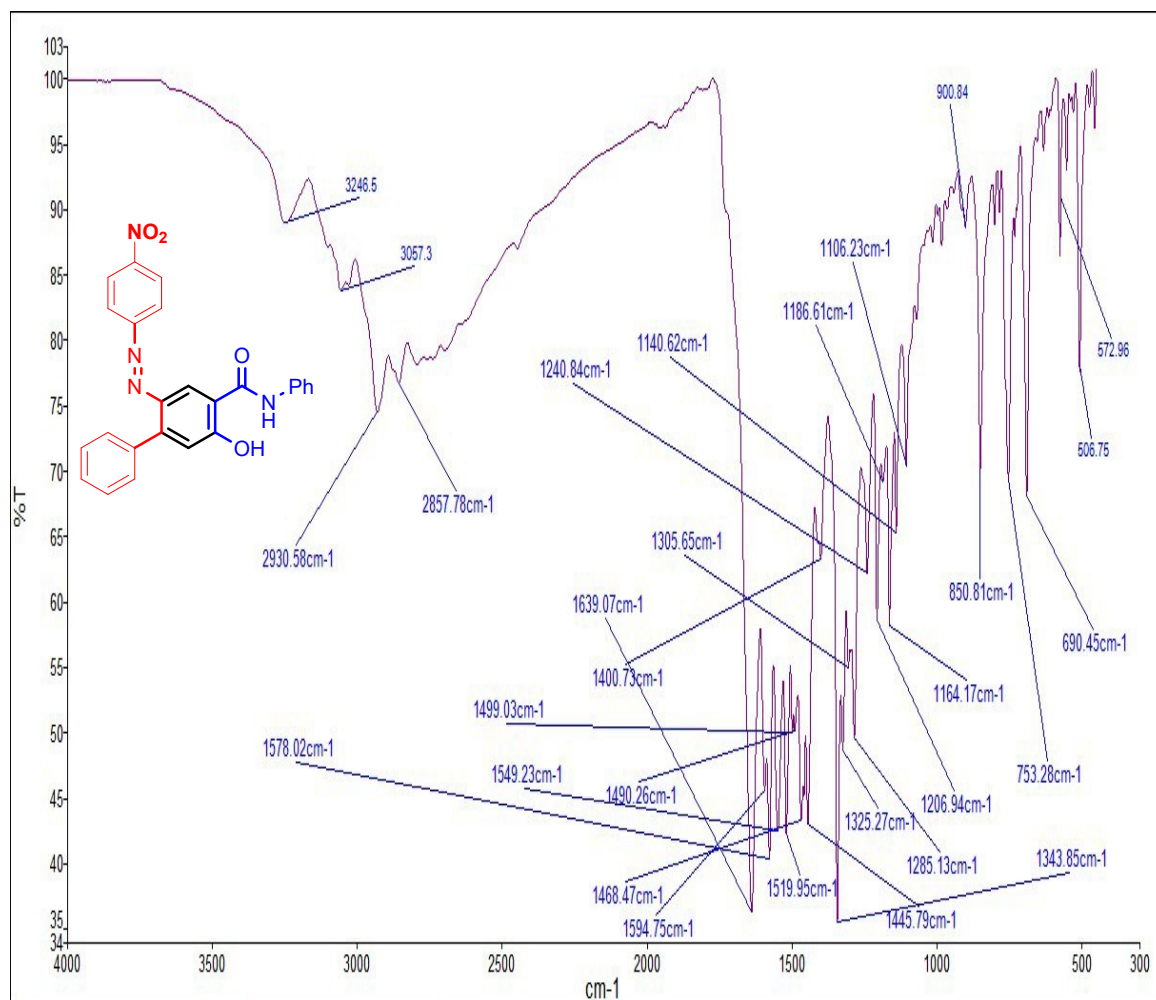

**FT-IR spectrum of compound 3d**

**4'-Chloro-5-hydroxy-*N*-phenyl-2-(phenylazo)-[1,1'-biphenyl]-4-carboxamide (3e)**

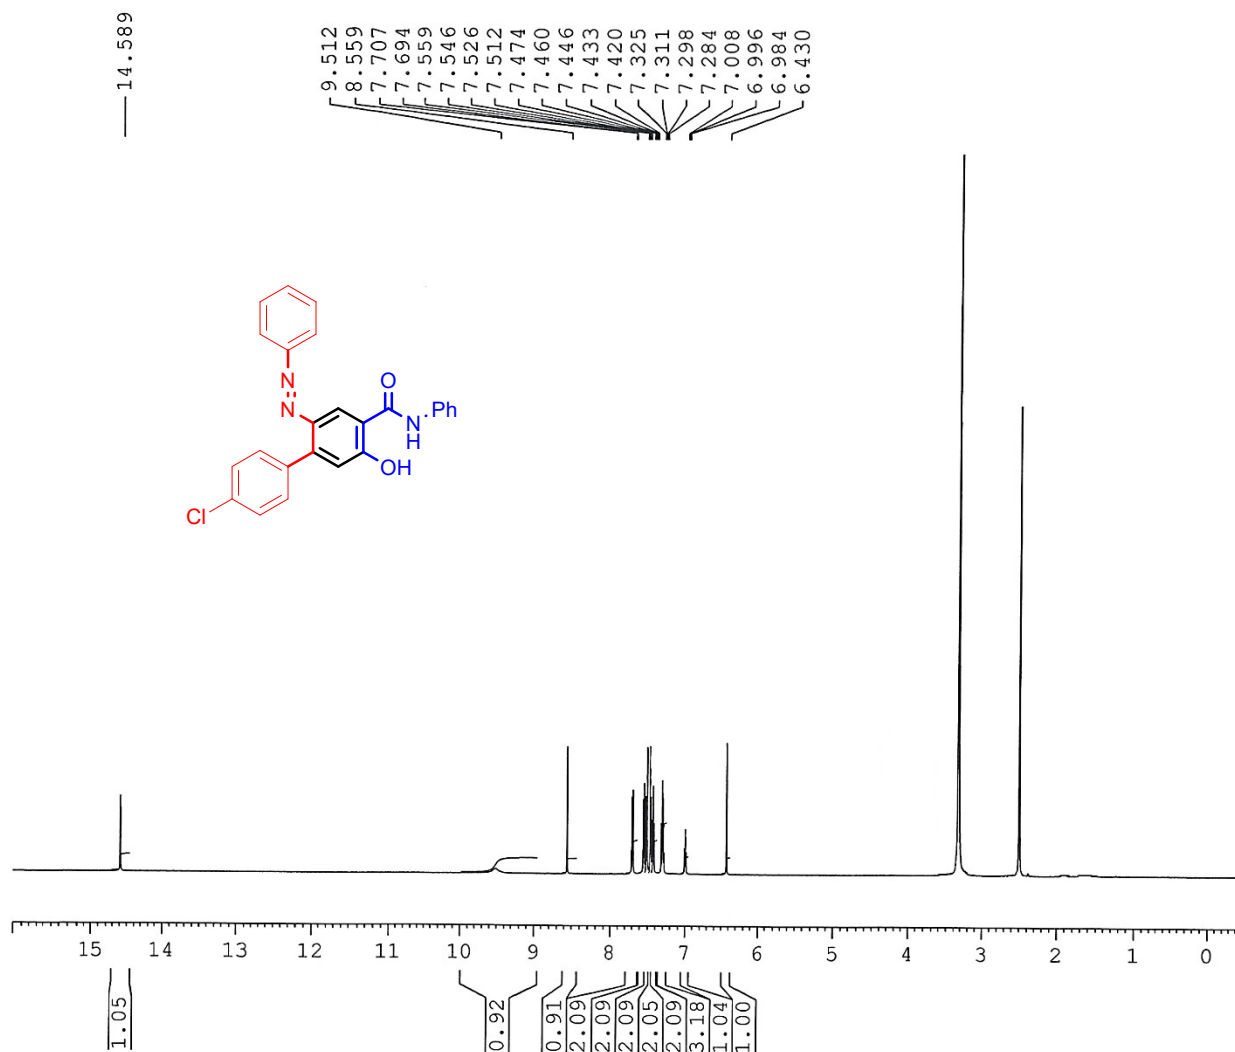

**<sup>1</sup>H NMR spectrum of compound 3e**

**4'-Chloro-5-hydroxy-*N*-phenyl-2-(phenylazo)-[1,1'-biphenyl]-4-carboxamide (3e)**

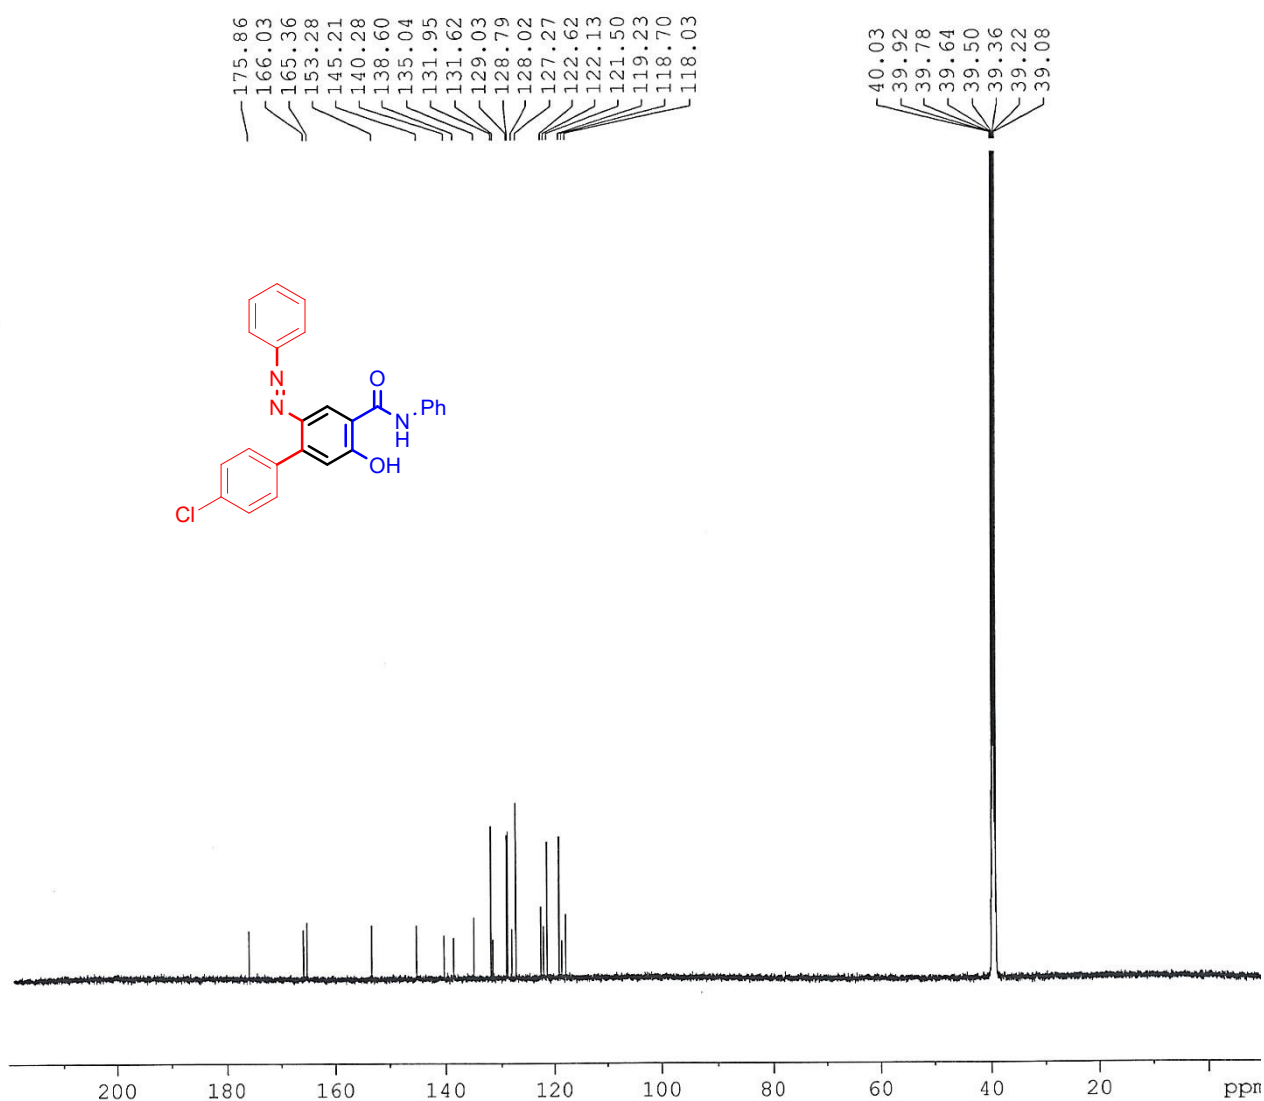

**<sup>13</sup>C NMR spectrum of compound 3e**

**2-(4-Bromophenylazo)-4'-chloro-5-hydroxy-N-phenyl-[1,1'-biphenyl]-4-carboxamide  
(3f)**

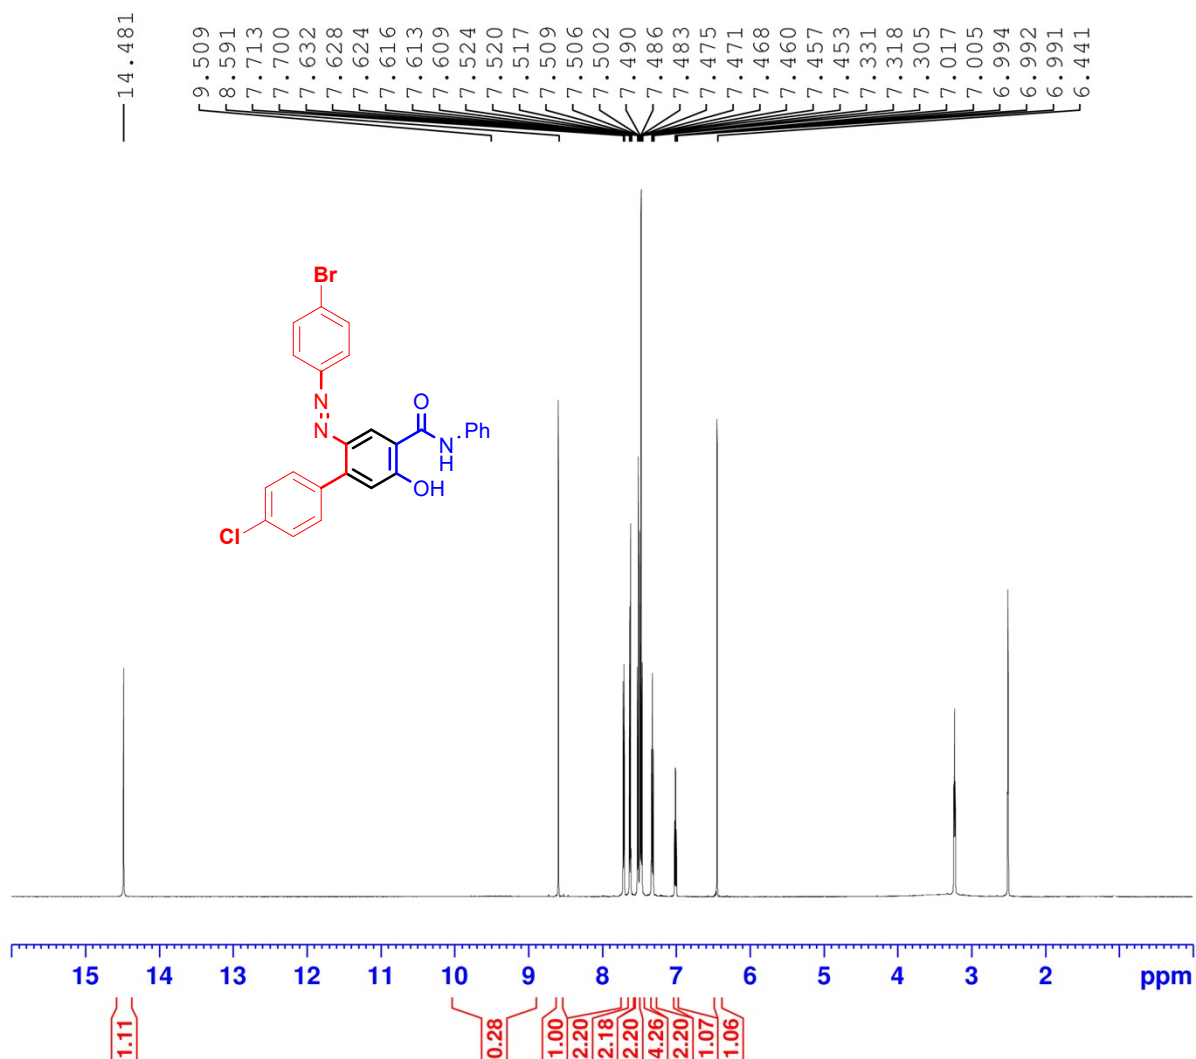

**<sup>1</sup>H NMR spectrum of compound 3f**

**2-(4-Bromophenylazo)-4'-chloro-5-hydroxy-N-phenyl-[1,1'-biphenyl]-4-carboxamide  
(3f)**

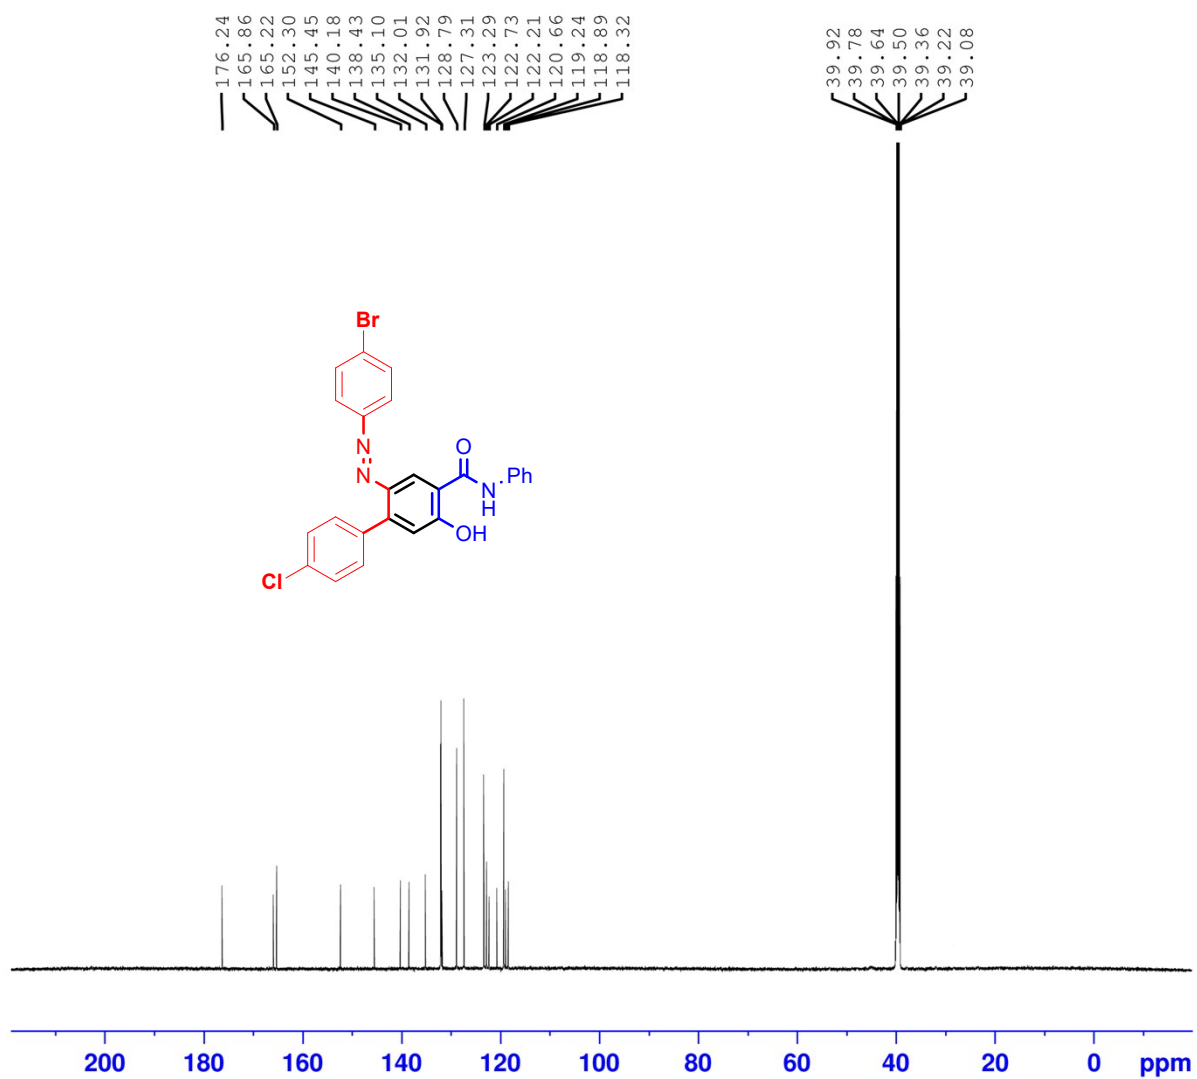

<sup>13</sup>C NMR spectrum of compound 3f

**2-(4-Bromophenylazo)-4'-chloro-5-hydroxy-N-phenyl-[1,1'-biphenyl]-4-carboxamide (3f)**

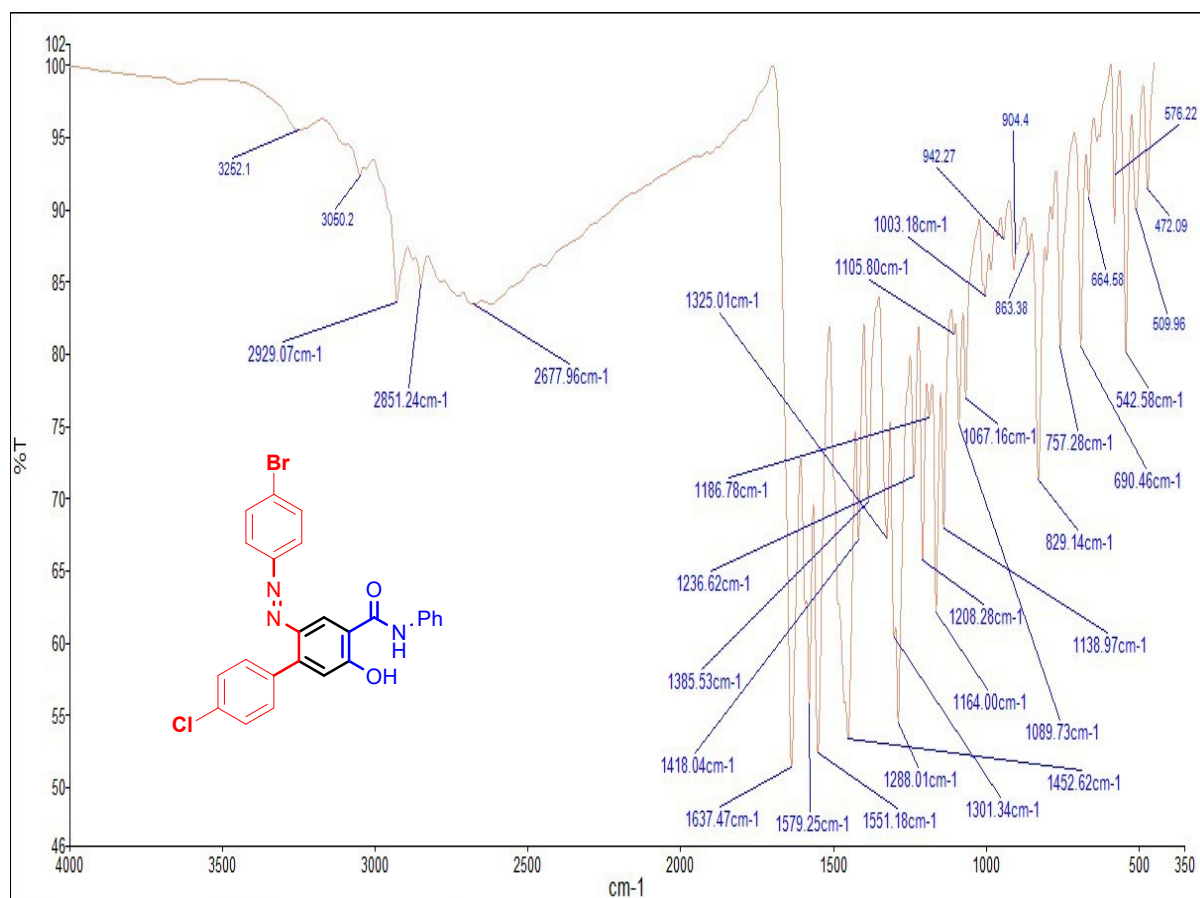

**FT-IR spectrum of compound 3f**

**4'-Bromo-2-(4-chlorophenylazo)-5-hydroxy-N-phenyl-[1,1'-biphenyl]-4-carboxamide (3g)**

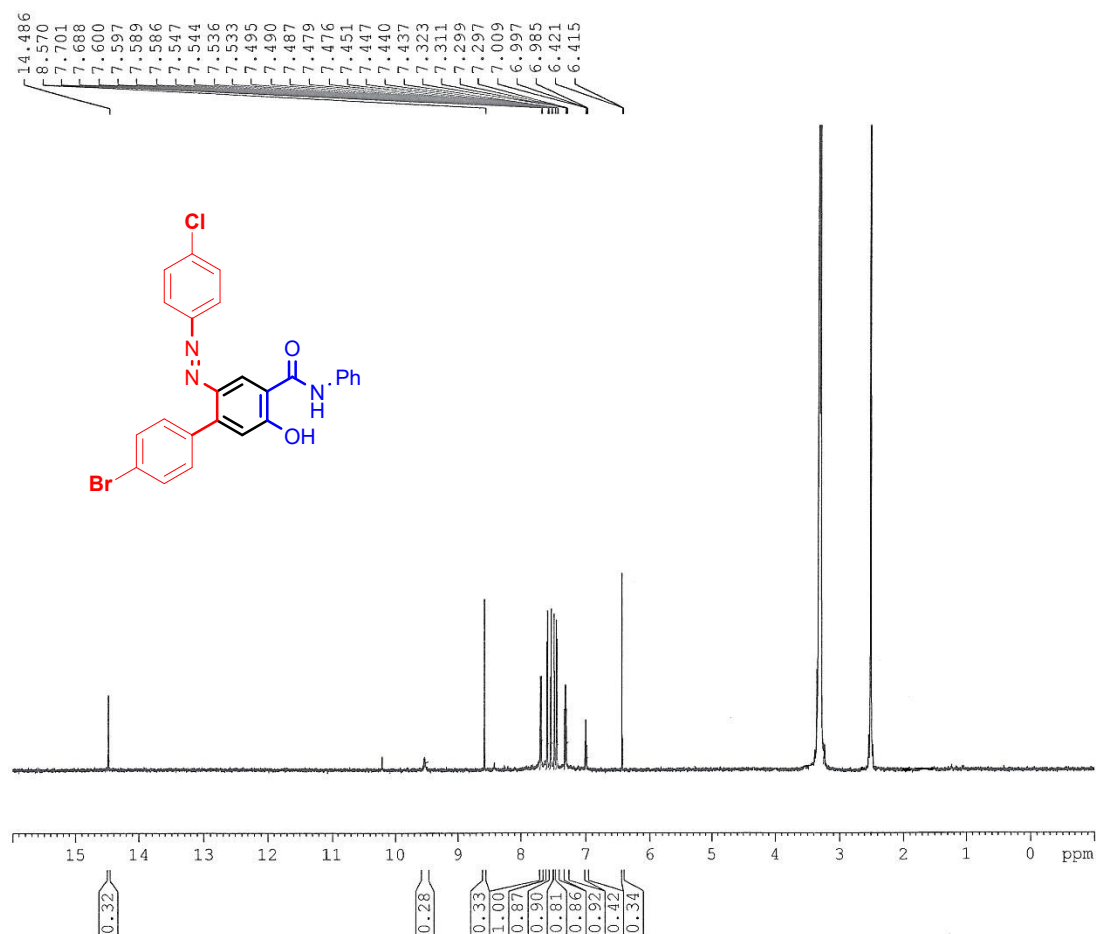

<sup>1</sup>H NMR spectrum of compound 3g

4'-Bromo-2-(4-chlorophenylazo)-5-hydroxy-N-phenyl-[1,1'-biphenyl]-4-carboxamide  
(3g)

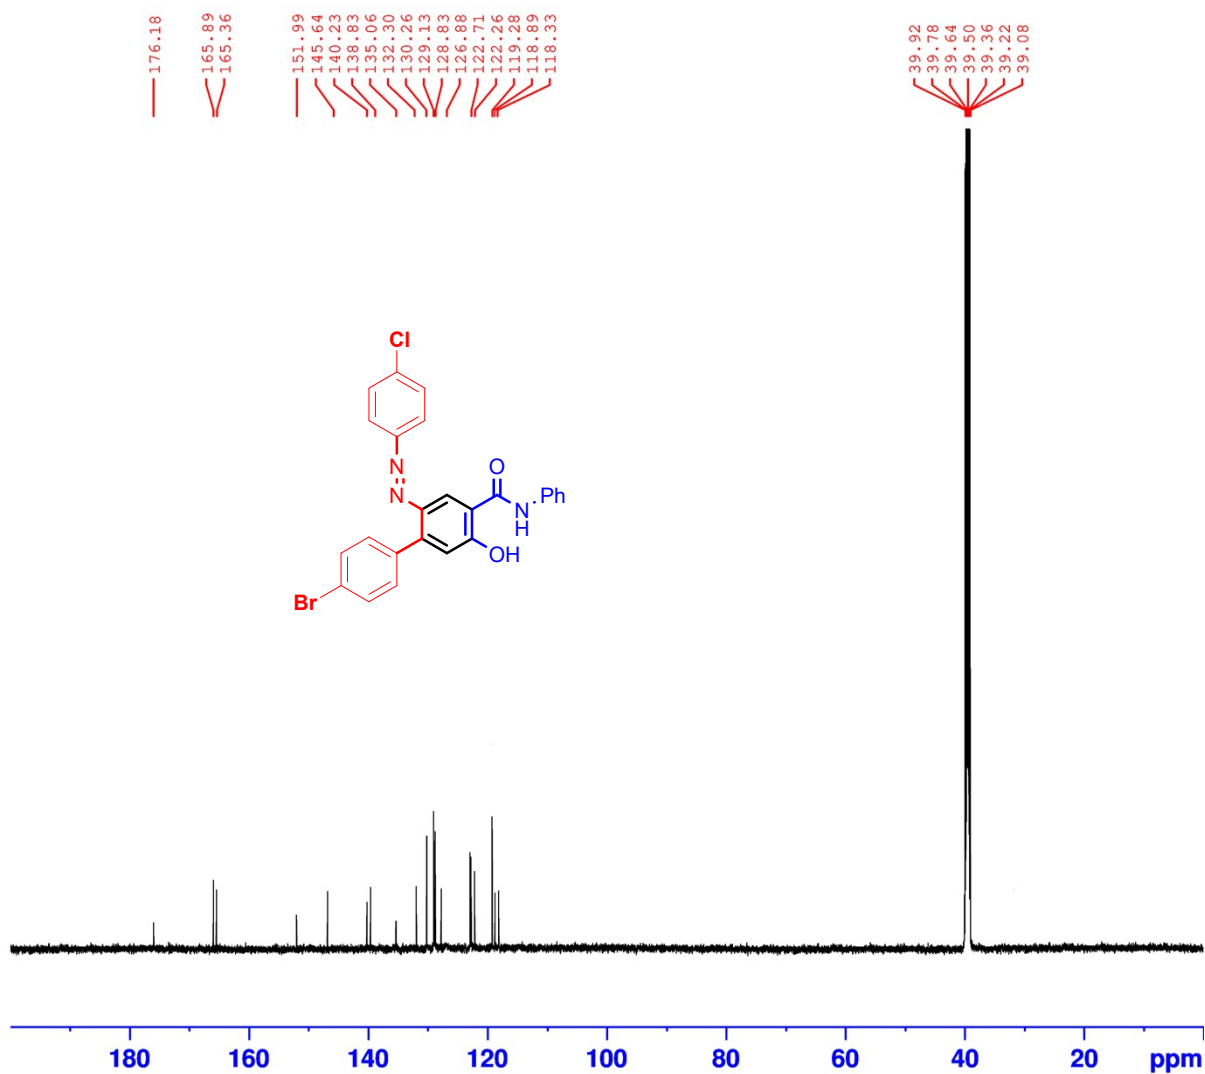

<sup>13</sup>C NMR spectrum of compound 3g

**4'-Bromo-2-(4-chlorophenylazo)-5-hydroxy-N-phenyl-[1,1'-biphenyl]-4-carboxamide (3g)**

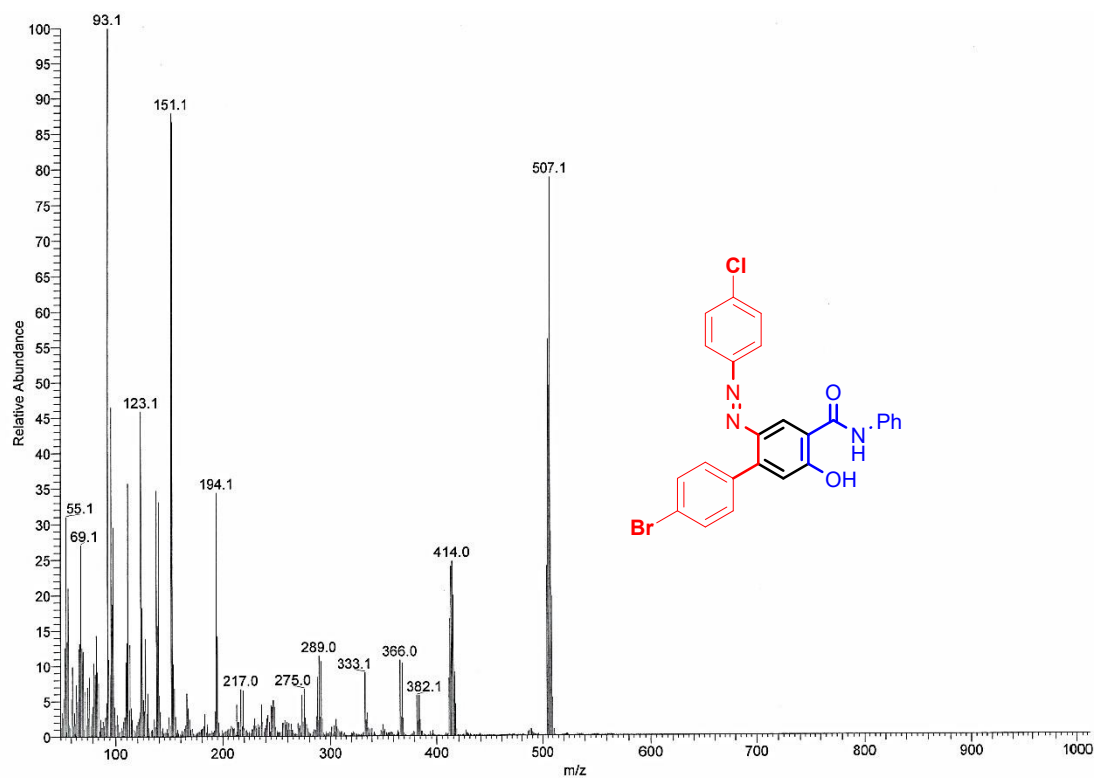

Mass spectrum of compound 3g

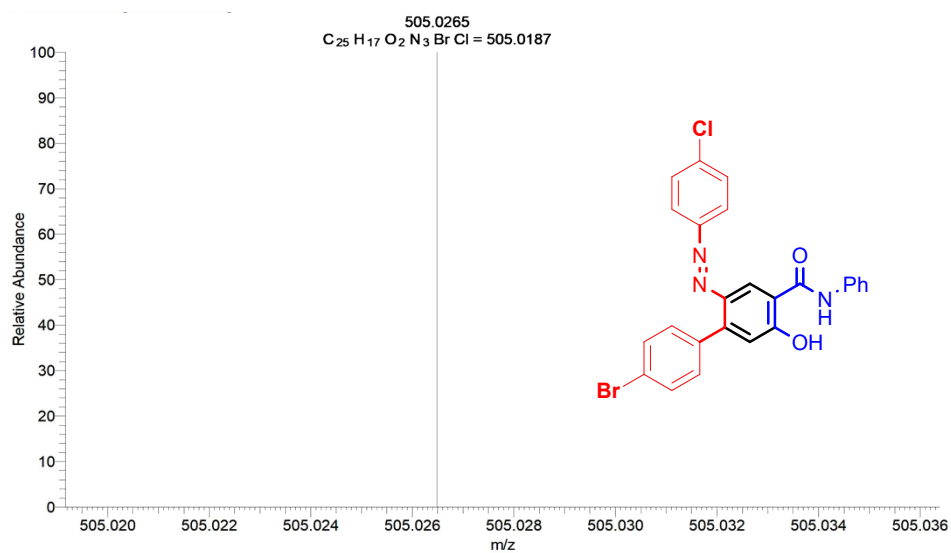

HRMS spectrum of compound 3g

4'-Bromo-2-(4-chlorophenylazo)-5-hydroxy-N-phenyl[1,1'-biphenyl]-4-carboxamide  
(3g)

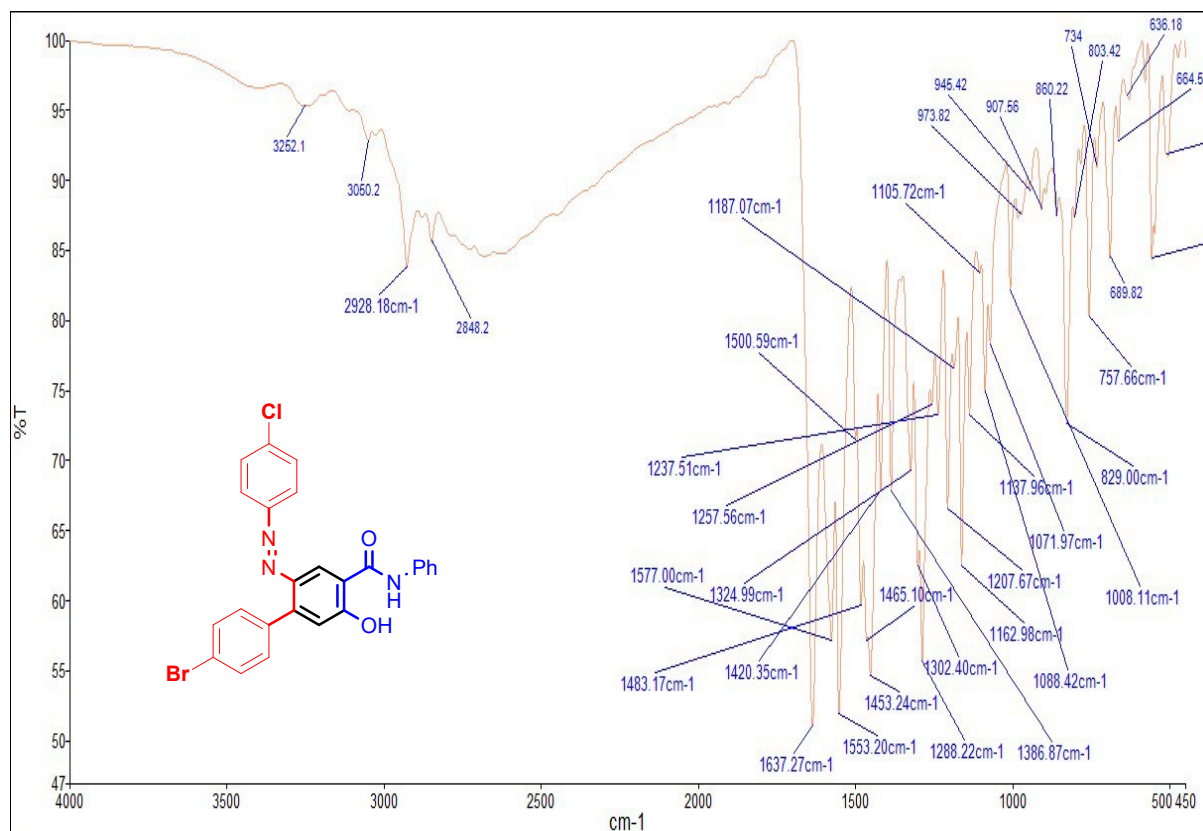

**FT-IR spectrum of compound 3g**

**2-(4-Chlorophenylazo)-4'-fluoro-5-hydroxy-N-phenyl-[1,1'-biphenyl]-4-carboxamide  
(3i)**

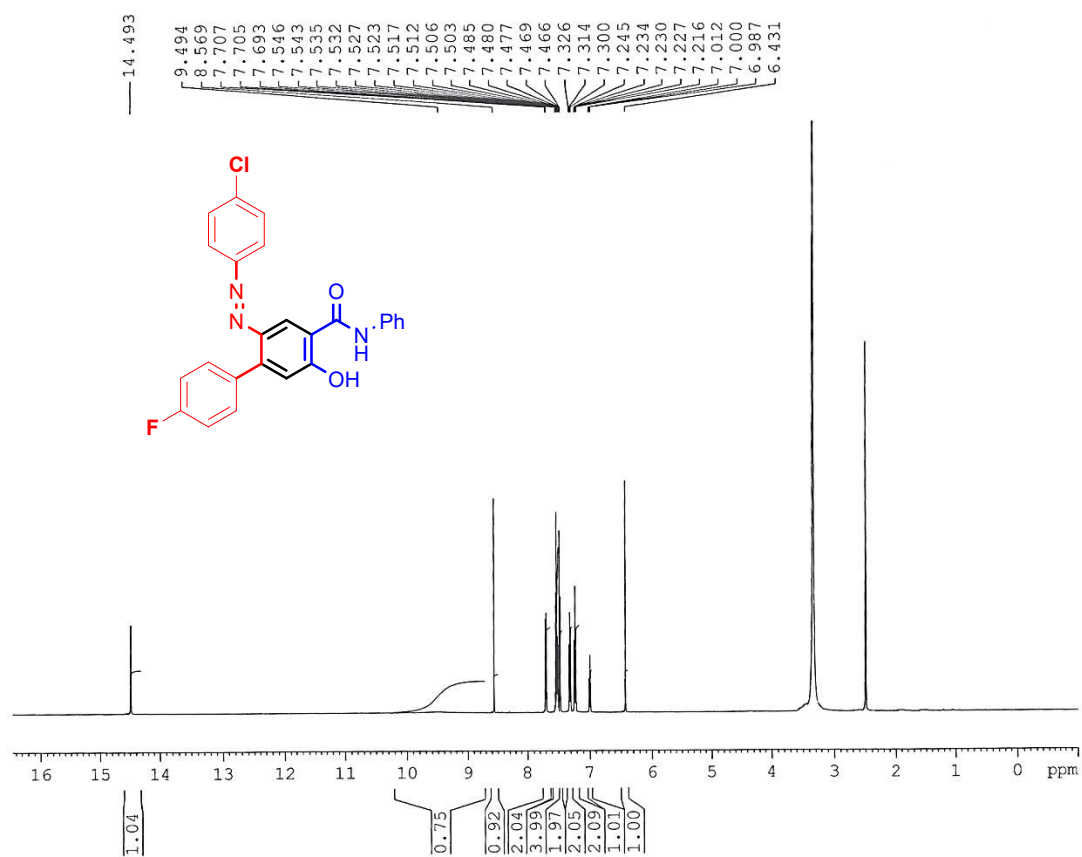

**<sup>1</sup>H NMR spectrum of compound 3i**

**2-(4-Chlorophenylazo)-4'-fluoro-5-hydroxy-N-phenyl-[1,1'-biphenyl]-4-carboxamide (3i):**

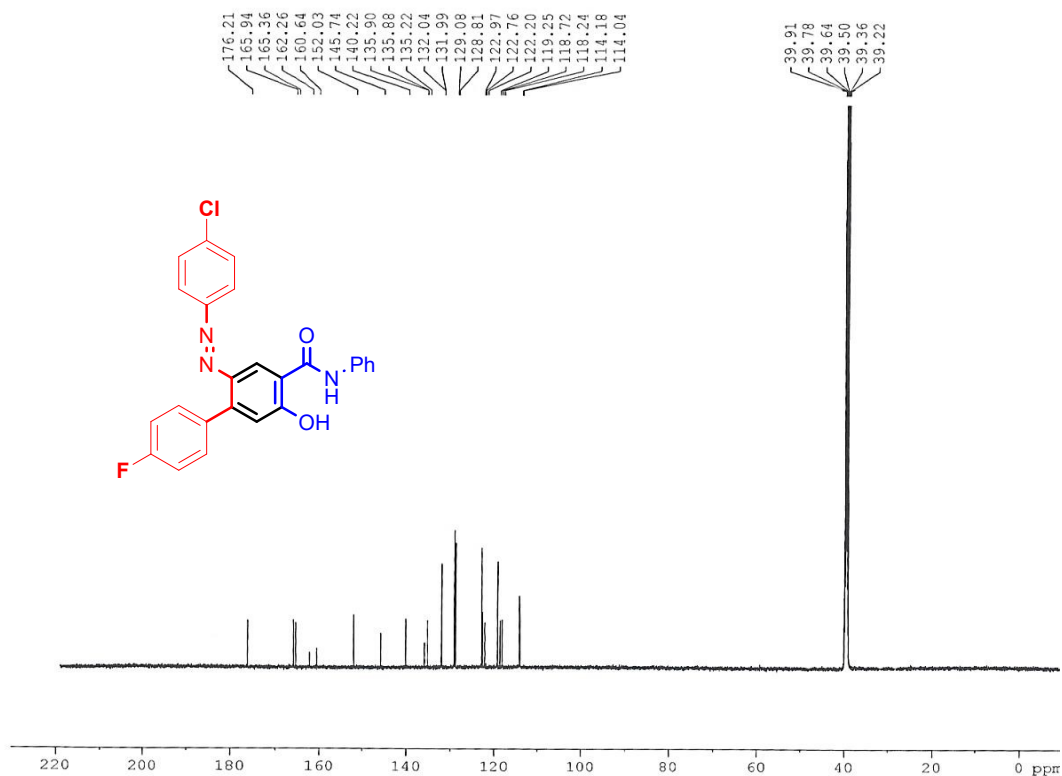

<sup>13</sup>C NMR spectrum of compound 3i

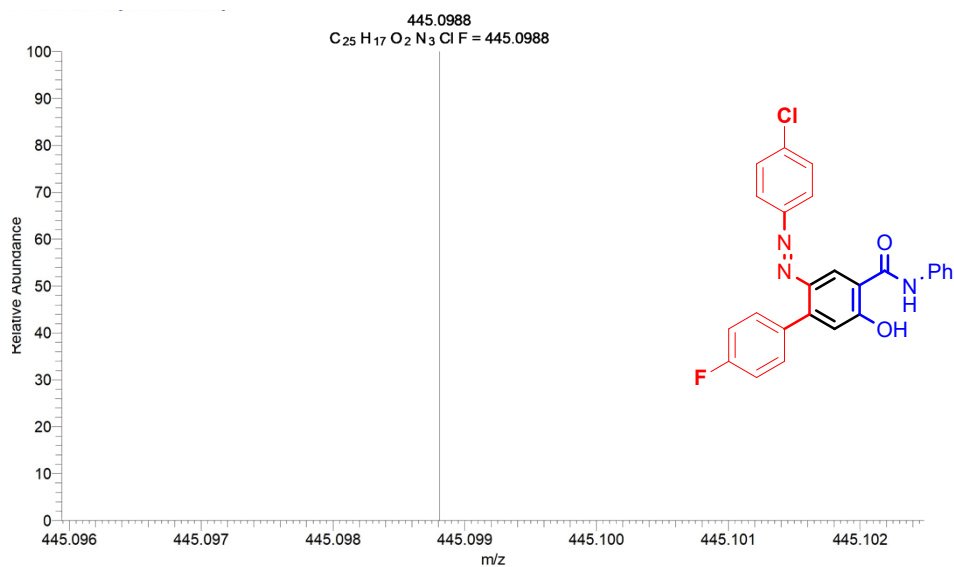

HRMS spectrum of compound 3i

2-(4-Chlorophenylazo)-4'-fluoro-5-hydroxy-N-phenyl-[1,1'-biphenyl]-4-carboxamide (3i):

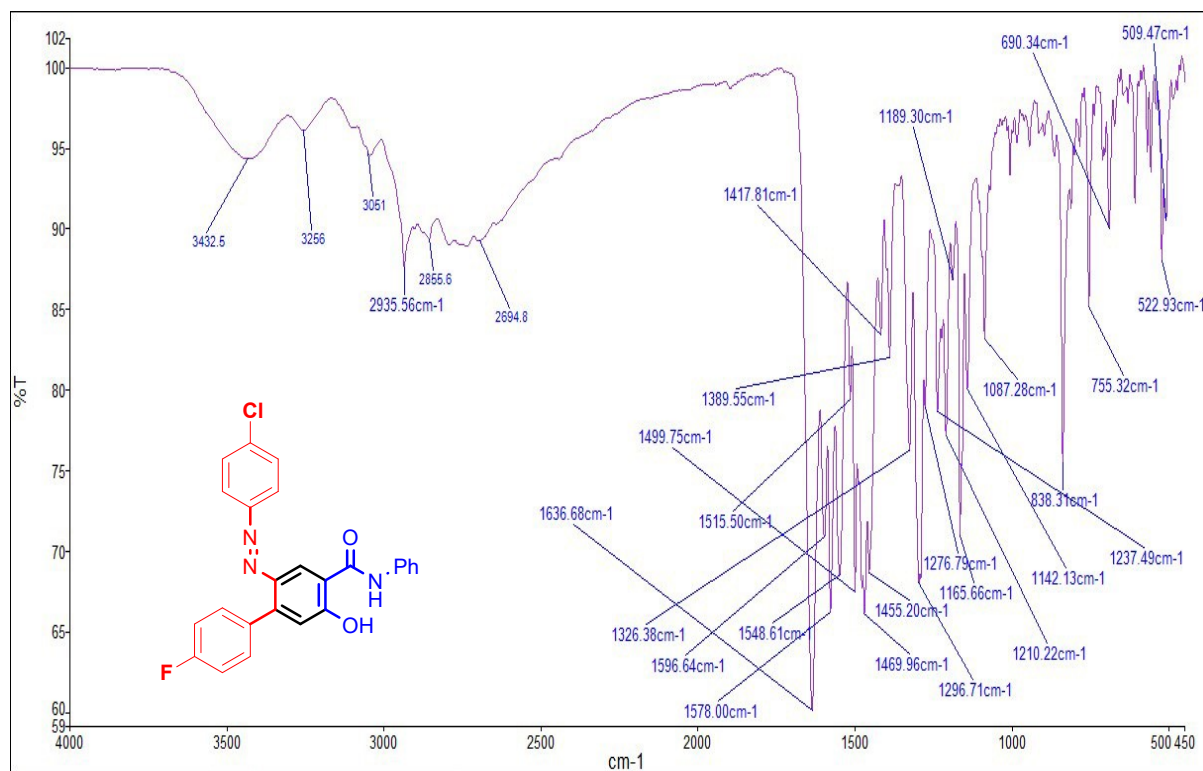

**FT-IR spectrum of compound 3i**

**2-(4-Bromophenylazo)-4'-fluoro-5-hydroxy-N-phenyl-[1,1'-biphenyl]-4-carboxamide (3j)**

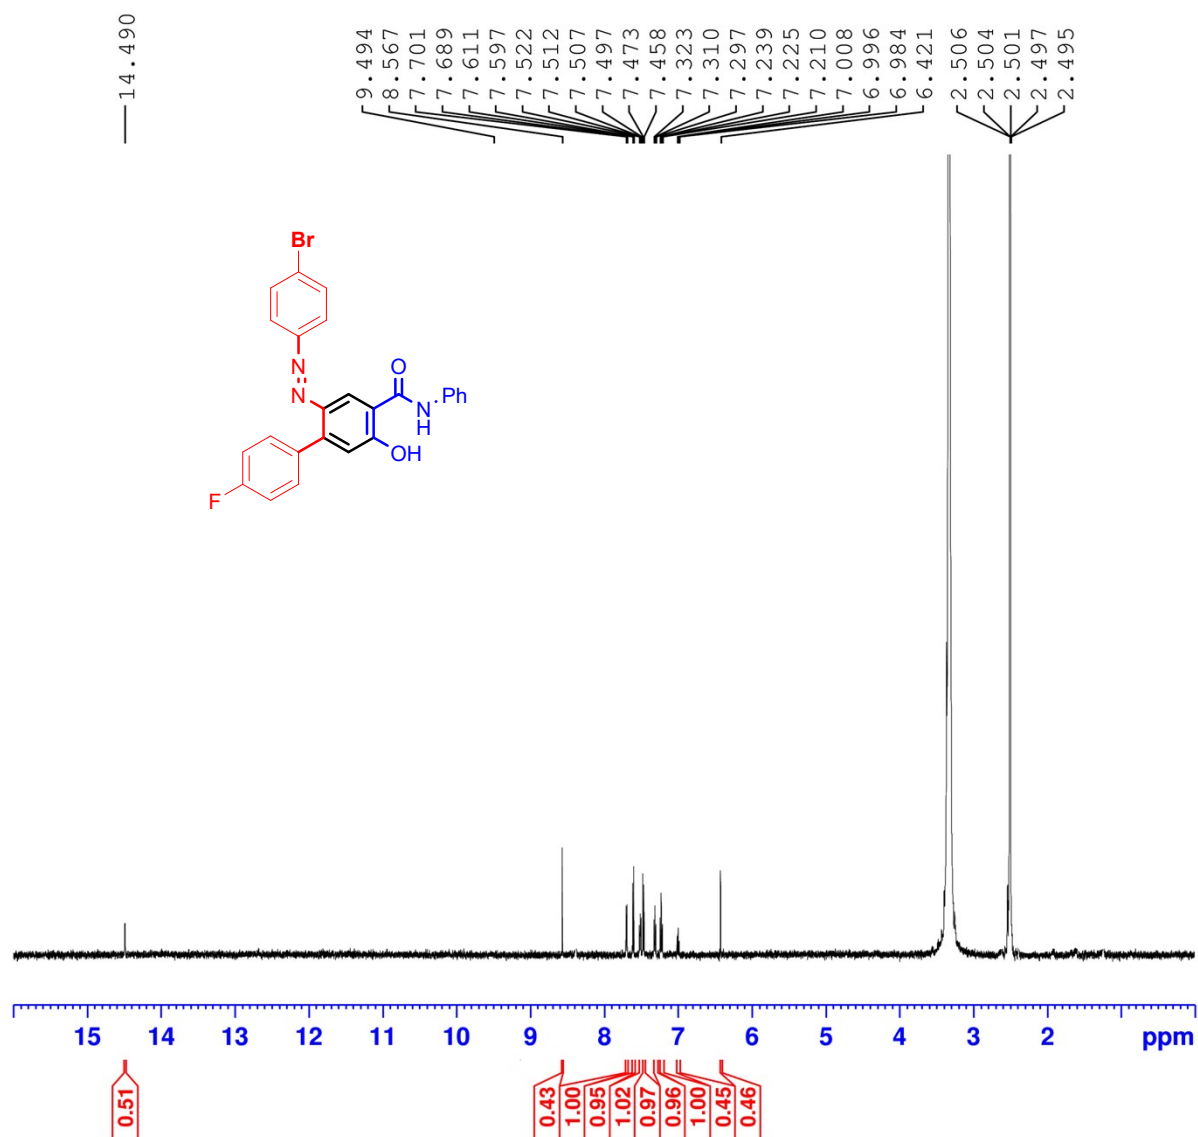

<sup>1</sup>H NMR spectrum of compound 3j

**2-(4-Bromophenylazo)-4'-fluoro-5-hydroxy-N-phenyl-[1,1'-biphenyl]-4-carboxamide  
(3j)**

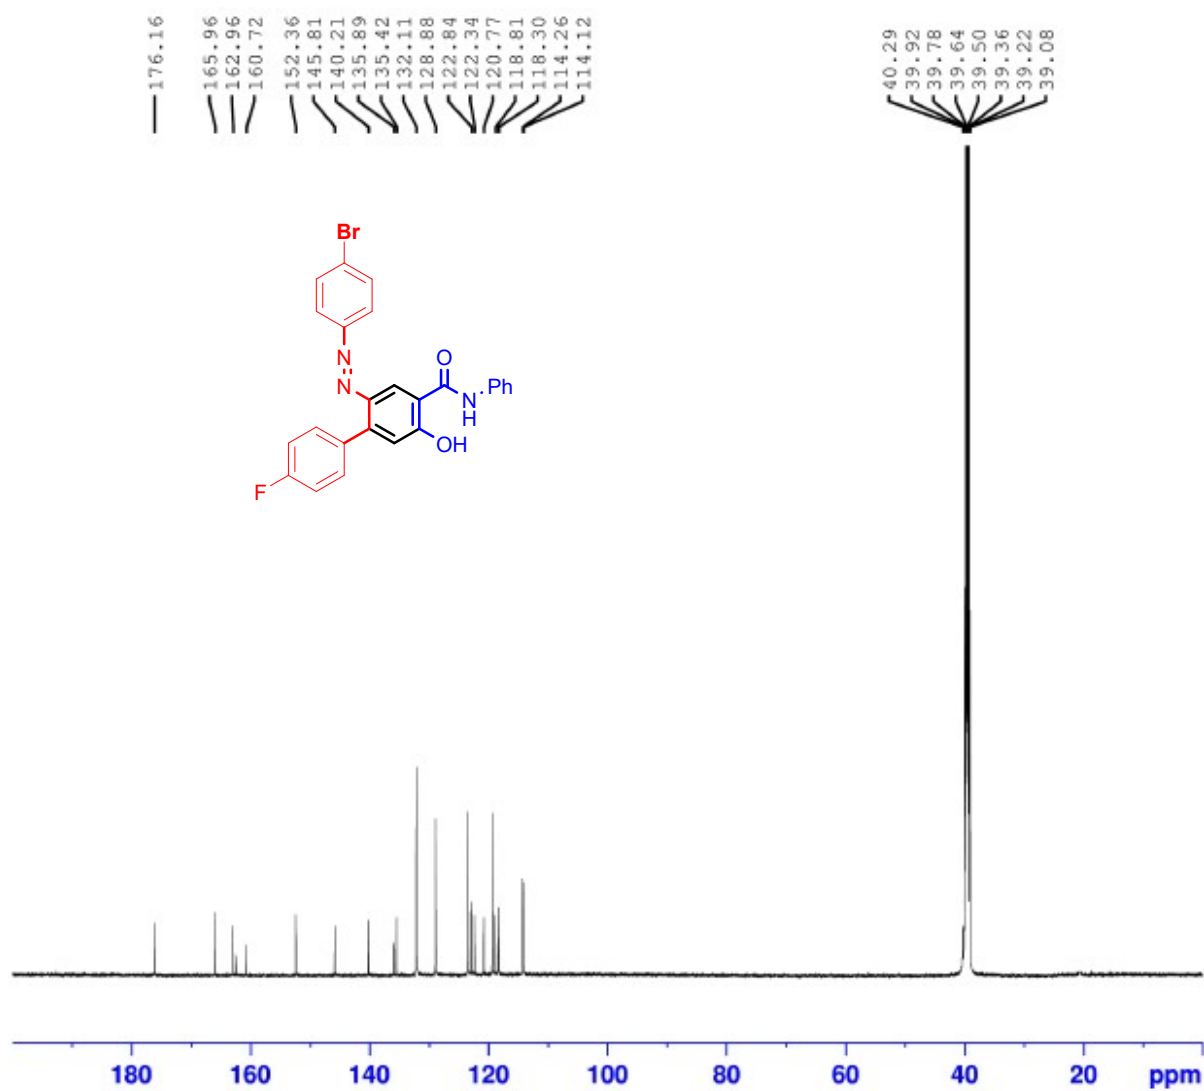

**<sup>13</sup>C NMR spectrum of compound 3j**

**2-(4-Bromophenylazo)-4'-fluoro-5-hydroxy-N-phenyl-[1,1'-biphenyl]-4-carboxamide  
(3j)**

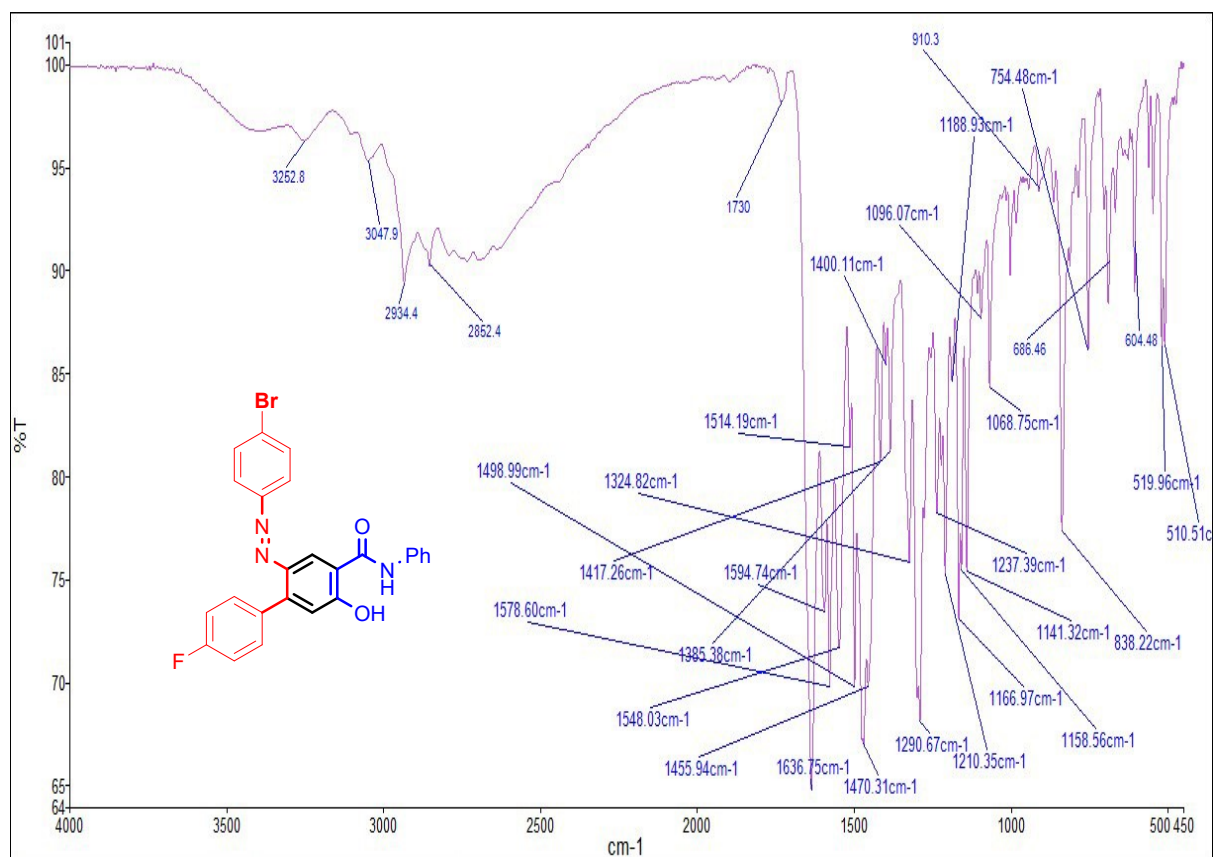

**FT-IR spectrum of compound 3j**

**2-(4-Bromophenylazo)-5-hydroxy-4'-methoxy-N-phenyl-[1,1'-biphenyl]-4-carboxamide  
(3k)**

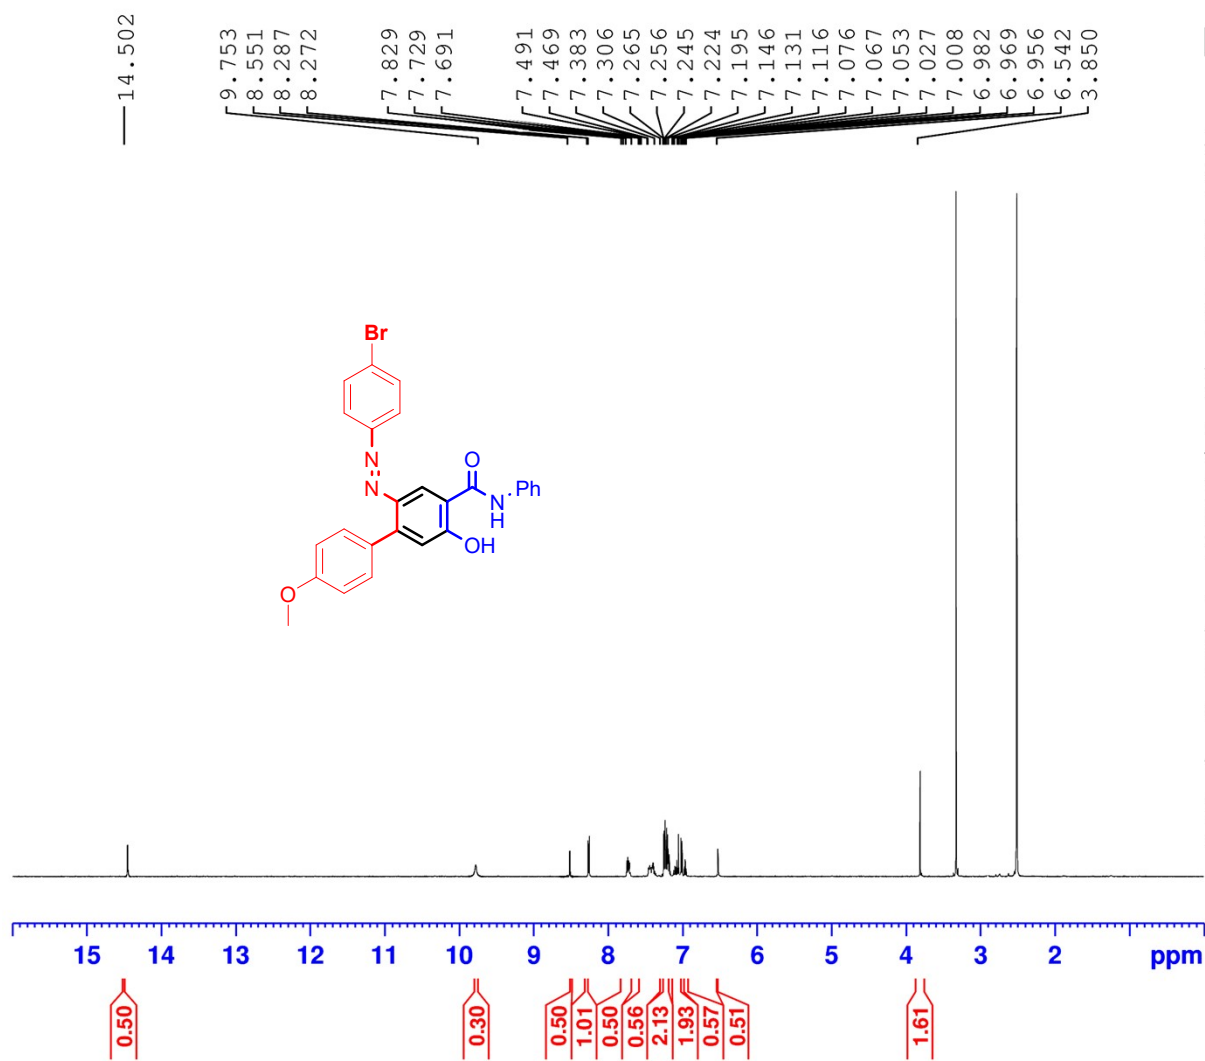

**<sup>1</sup>H NMR spectrum of compound 3k**

**2-(4-Bromophenylazo)-5-hydroxy-4'-methoxy-N-phenyl-[1,1'-biphenyl]-4-carboxamide  
(3k)**

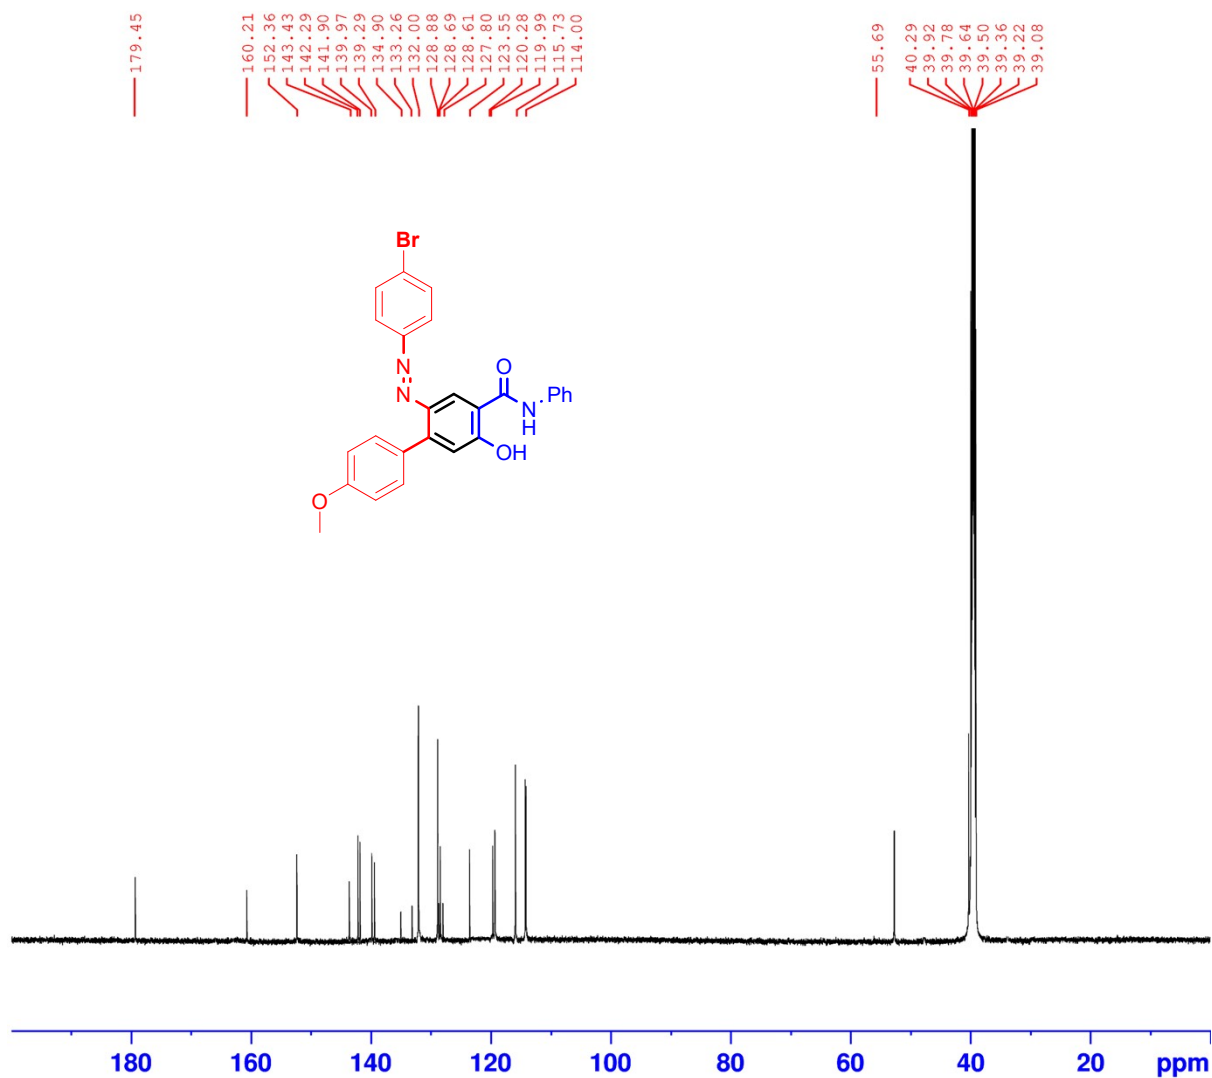

**<sup>13</sup>C NMR spectrum of compound 3k**

**5-Hydroxy-4'-methoxy-2-(2-nitrophenylazo)-N-phenyl-[1,1'-biphenyl]-4-carboxamide  
(3l)**

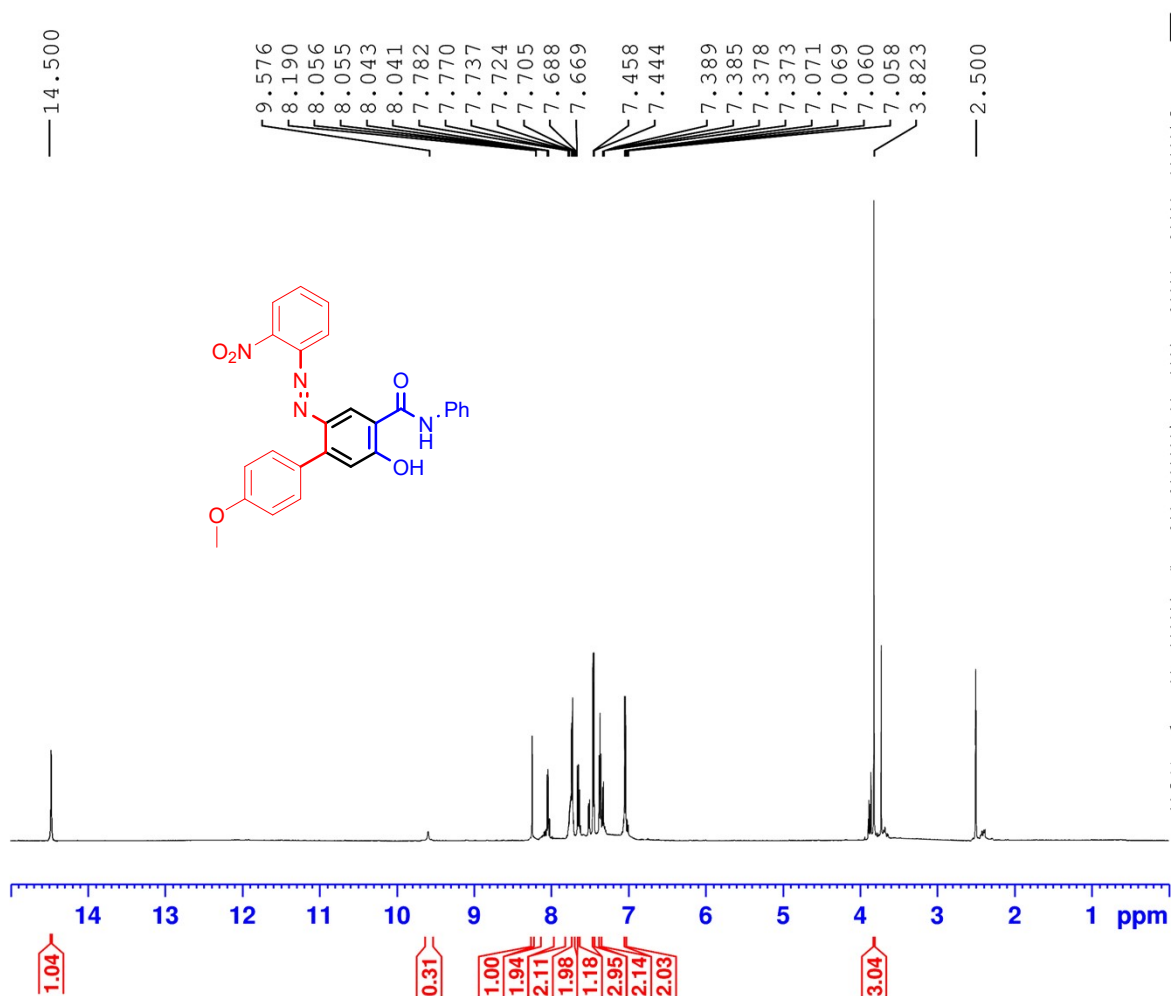

**<sup>1</sup>H NMR spectrum of compound 3l**

**5-Hydroxy-4'-methoxy-2-(2-nitrophenylazo)-N-phenyl-[1,1'-biphenyl]-4-carboxamide  
(3l)**

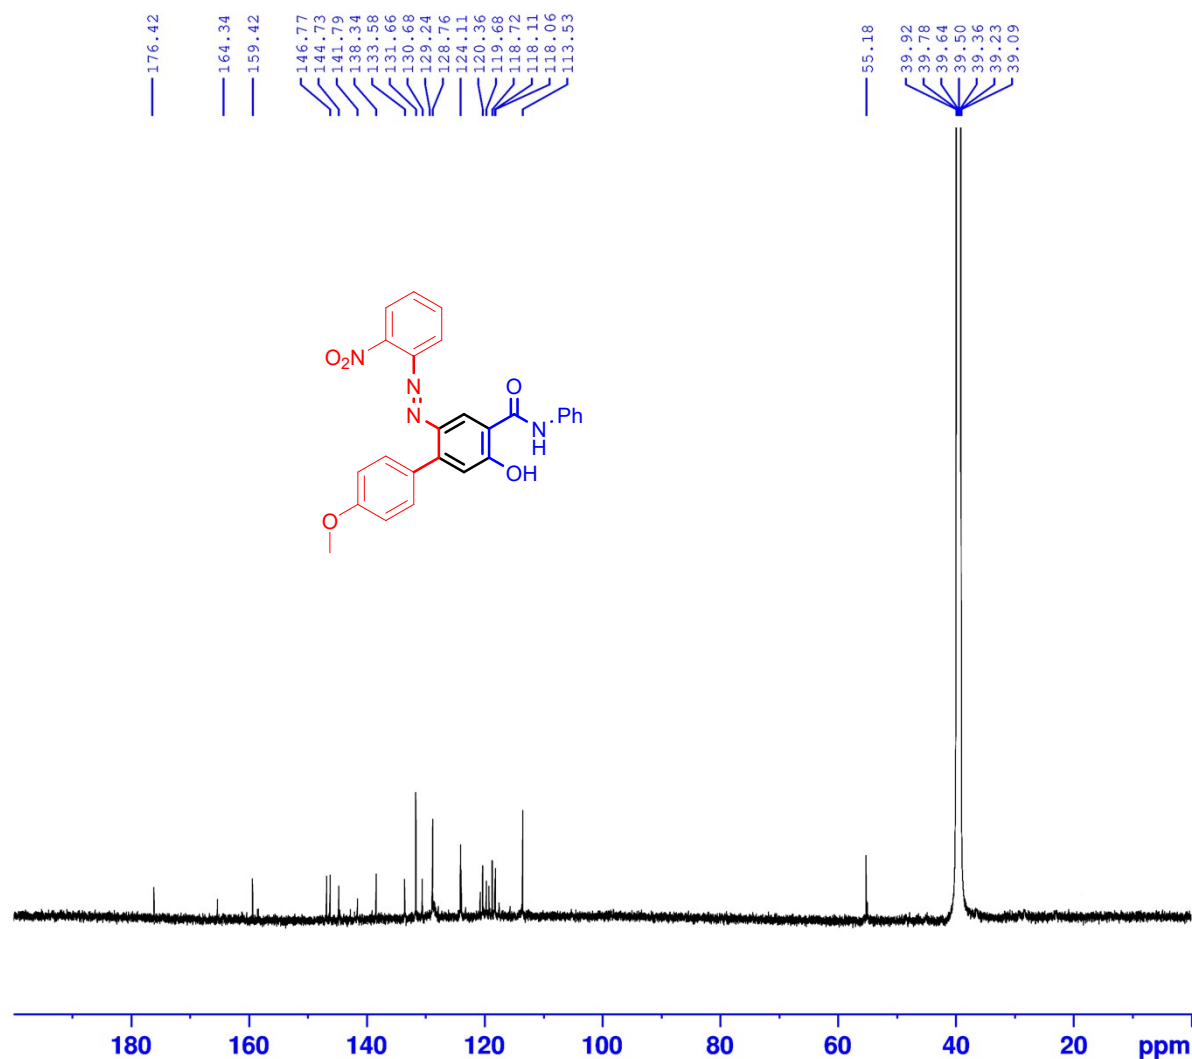

<sup>13</sup>C NMR spectrum of compound 3l

**2-(4-Chlorophenylazo)-5-hydroxy-N-phenyl-[1,1'-biphenyl]-4-carboxamide (3m)**

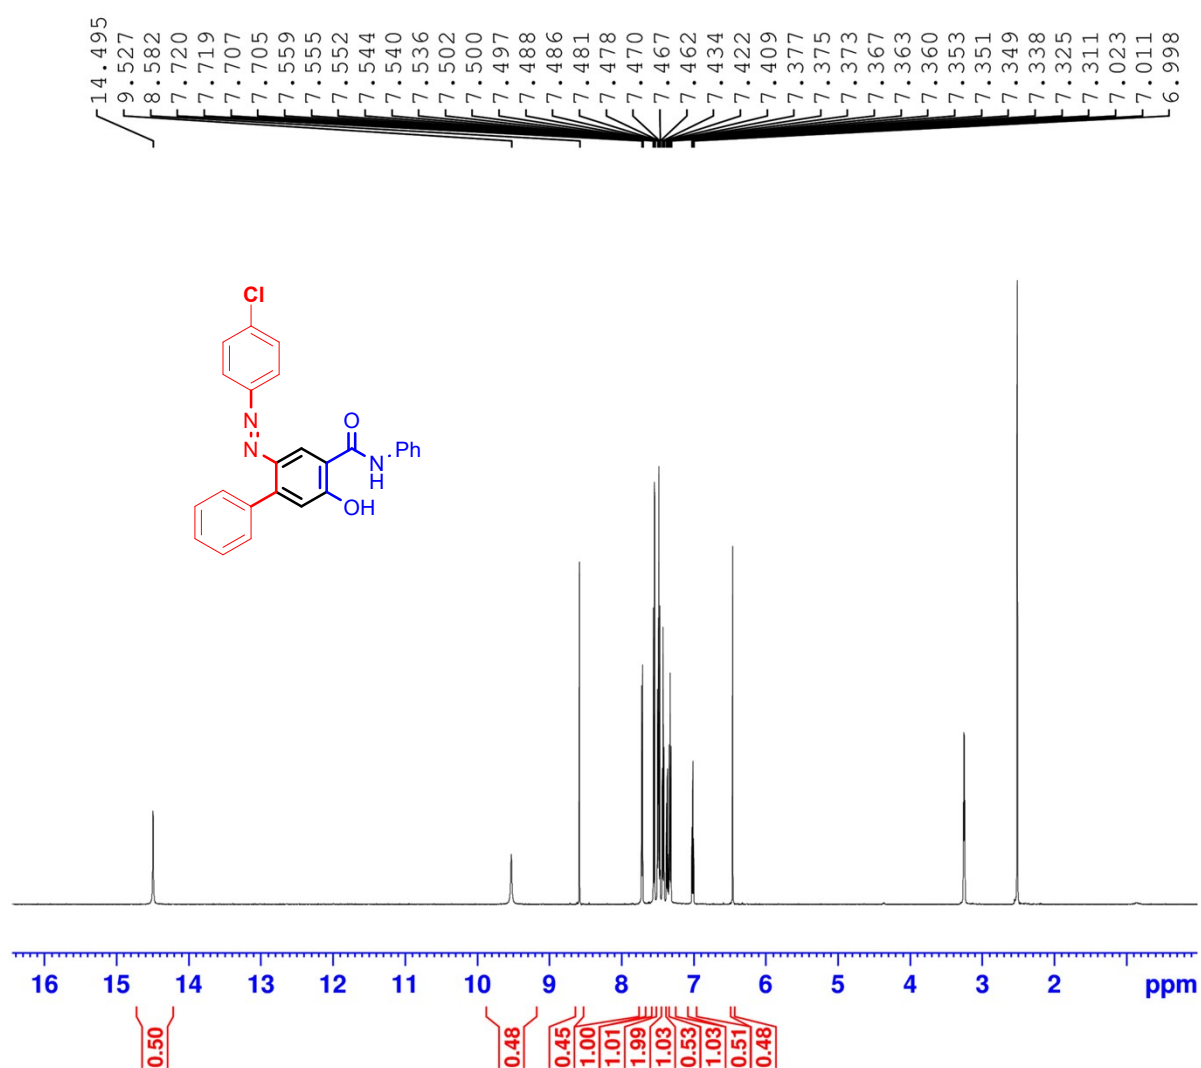

**<sup>1</sup>H NMR spectrum of compound 3m**

**2-(4-Chlorophenylazo)-5-hydroxy-N-phenyl-[1,1'-biphenyl]-4-carboxamide (3m)**

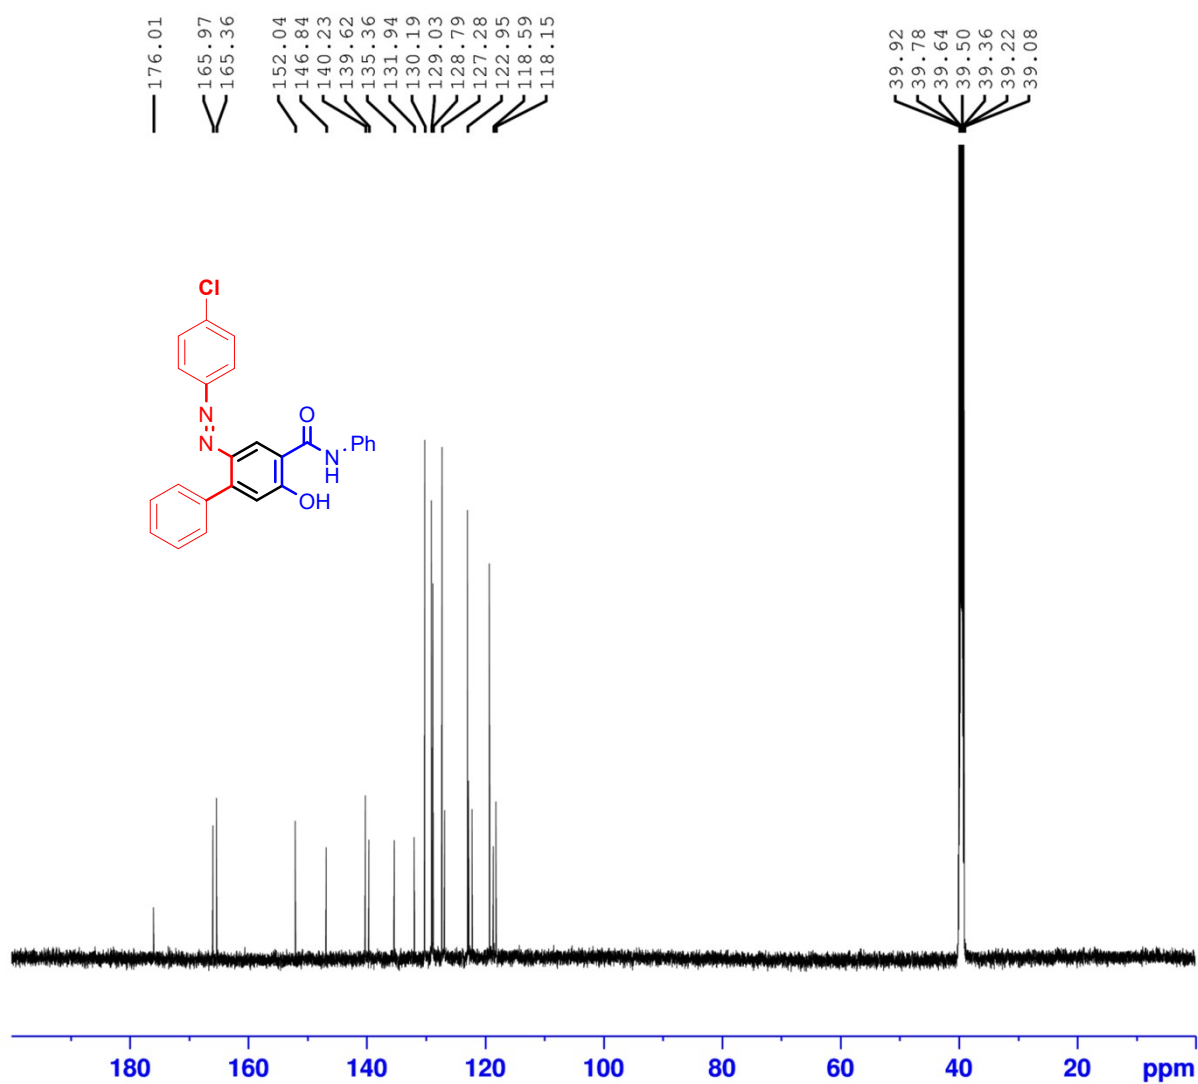

$^{13}\text{C}$  NMR spectrum of compound 3m

**2-(4-Chlorophenylazo)-5-hydroxy-N-phenyl-[1,1'-biphenyl]-4-carboxamide (3m)**

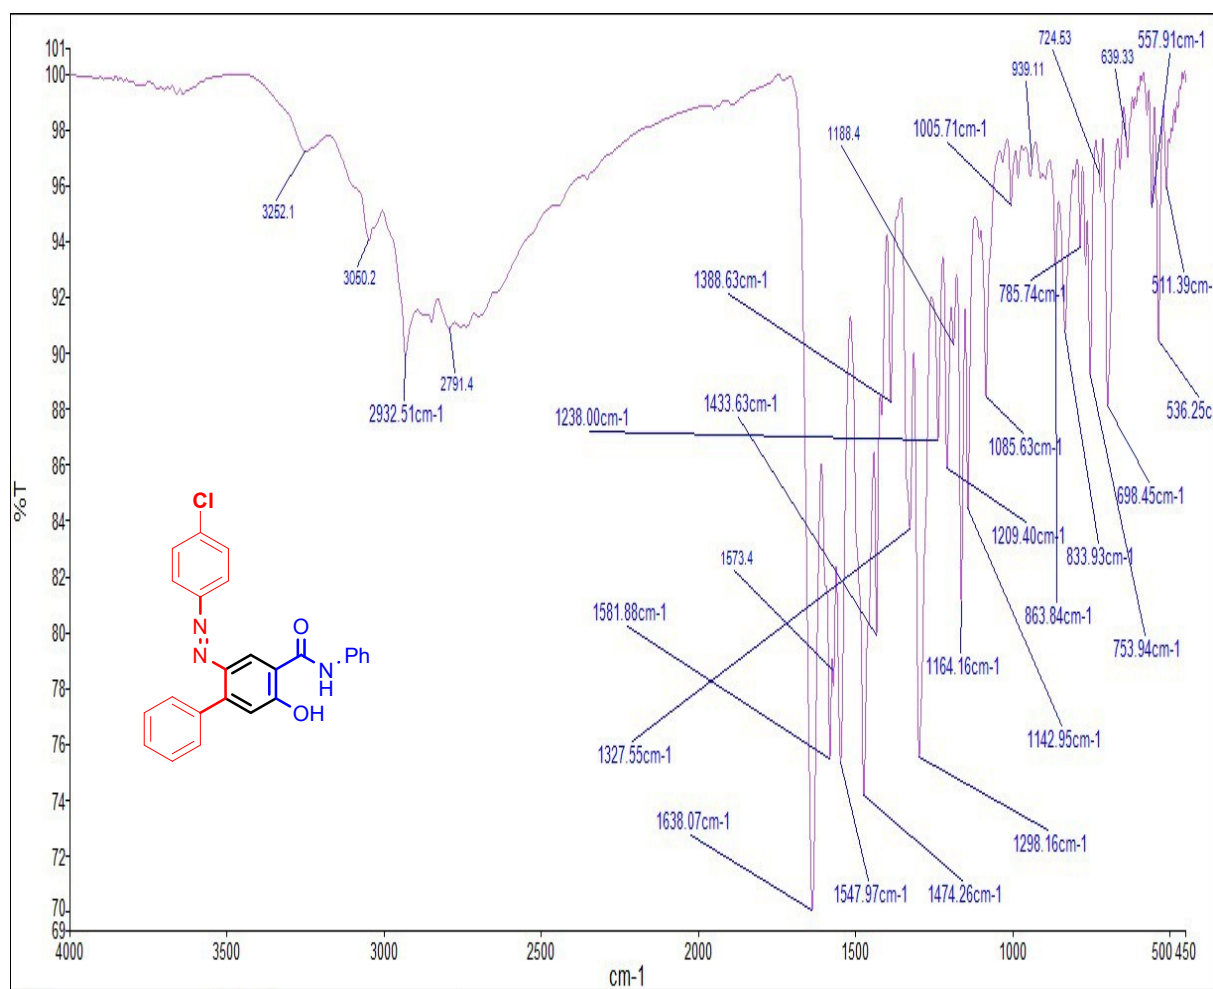

**FT-IR spectrum of compound 3m**

**2-(4-Bromophenylazo)-5-hydroxy-N-phenyl-[1,1'-biphenyl]-4-carboxamide (3n)**

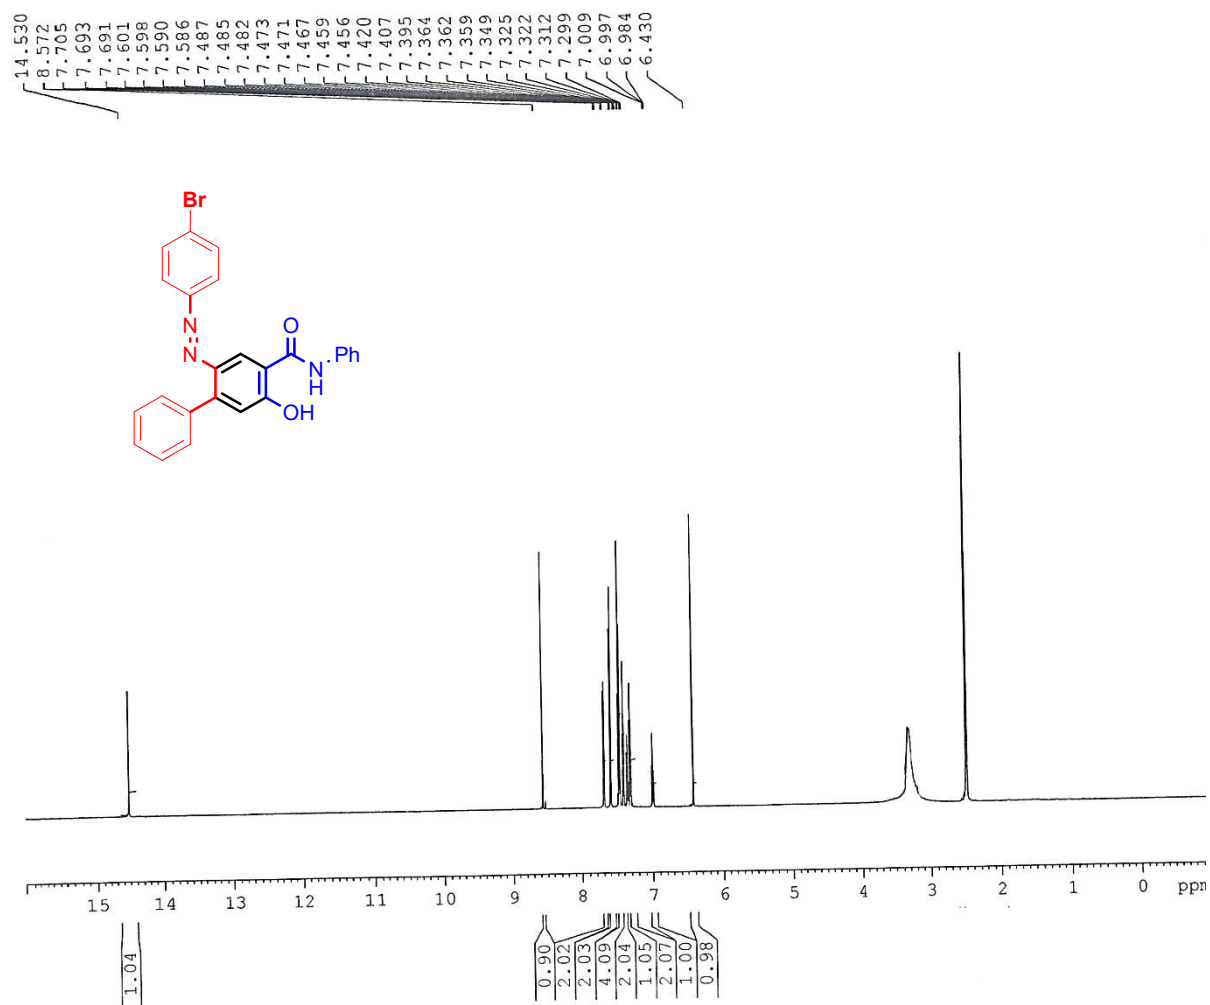

**<sup>1</sup>H NMR spectrum of compound 3n**

## 2-(4-Bromophenylazo)-5-hydroxy-N-phenyl-[1,1'-biphenyl]-4-carboxamide (3n)

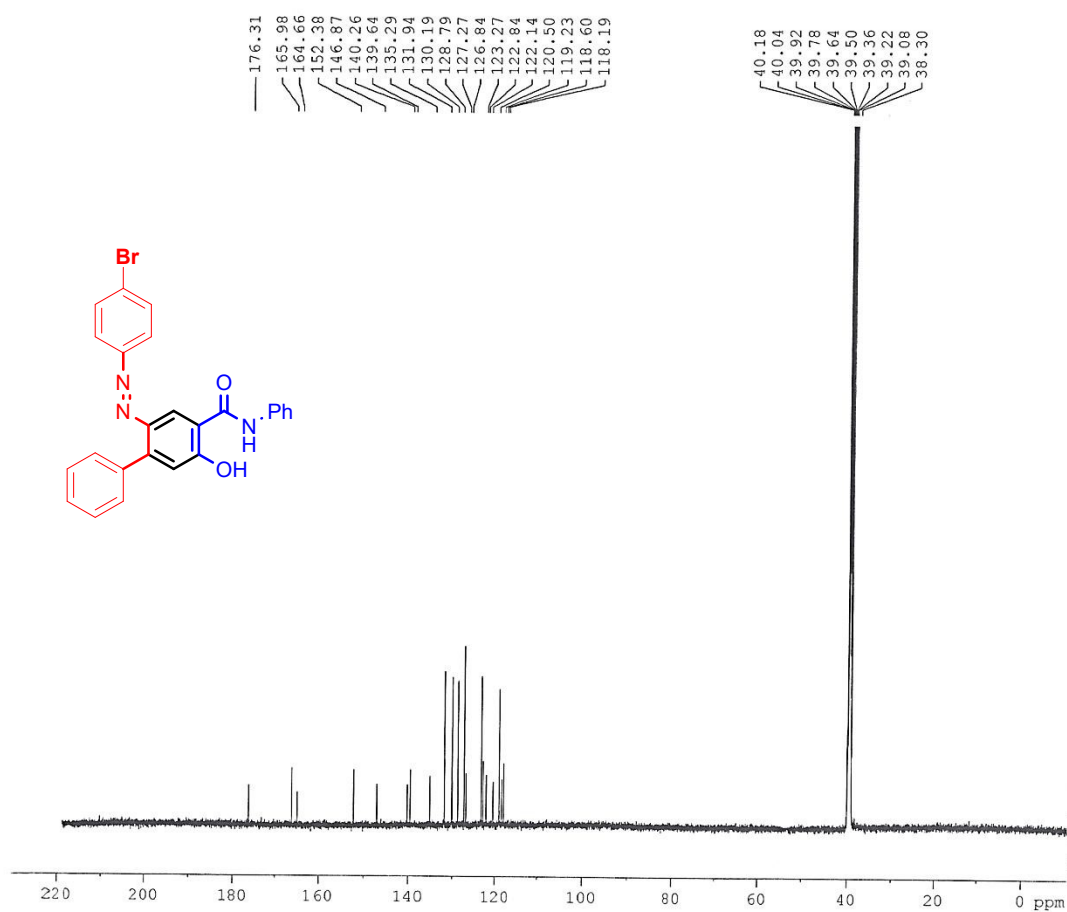

**<sup>13</sup>C NMR spectrum of compound 3n**

HRMS-12DH-cmass2 #299 RT: 9.73 AV: 1 NL: 2.74E5  
T: + c EI Full ms [439.50-505.50]

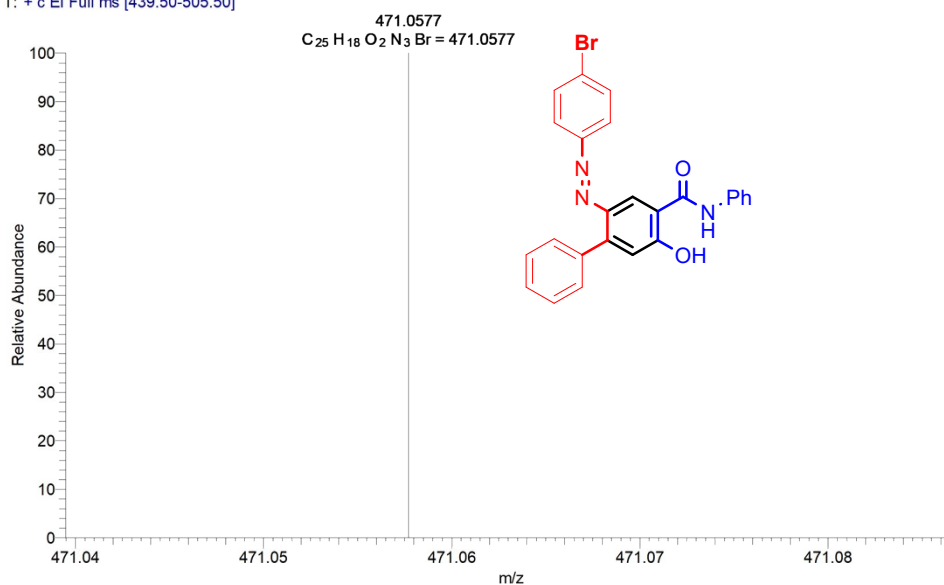

**HRMS spectrum of compound 3n**

## 2-(4-Bromophenylazo)-5-hydroxy-N-phenyl-[1,1'-biphenyl]-4-carboxamide (3n)

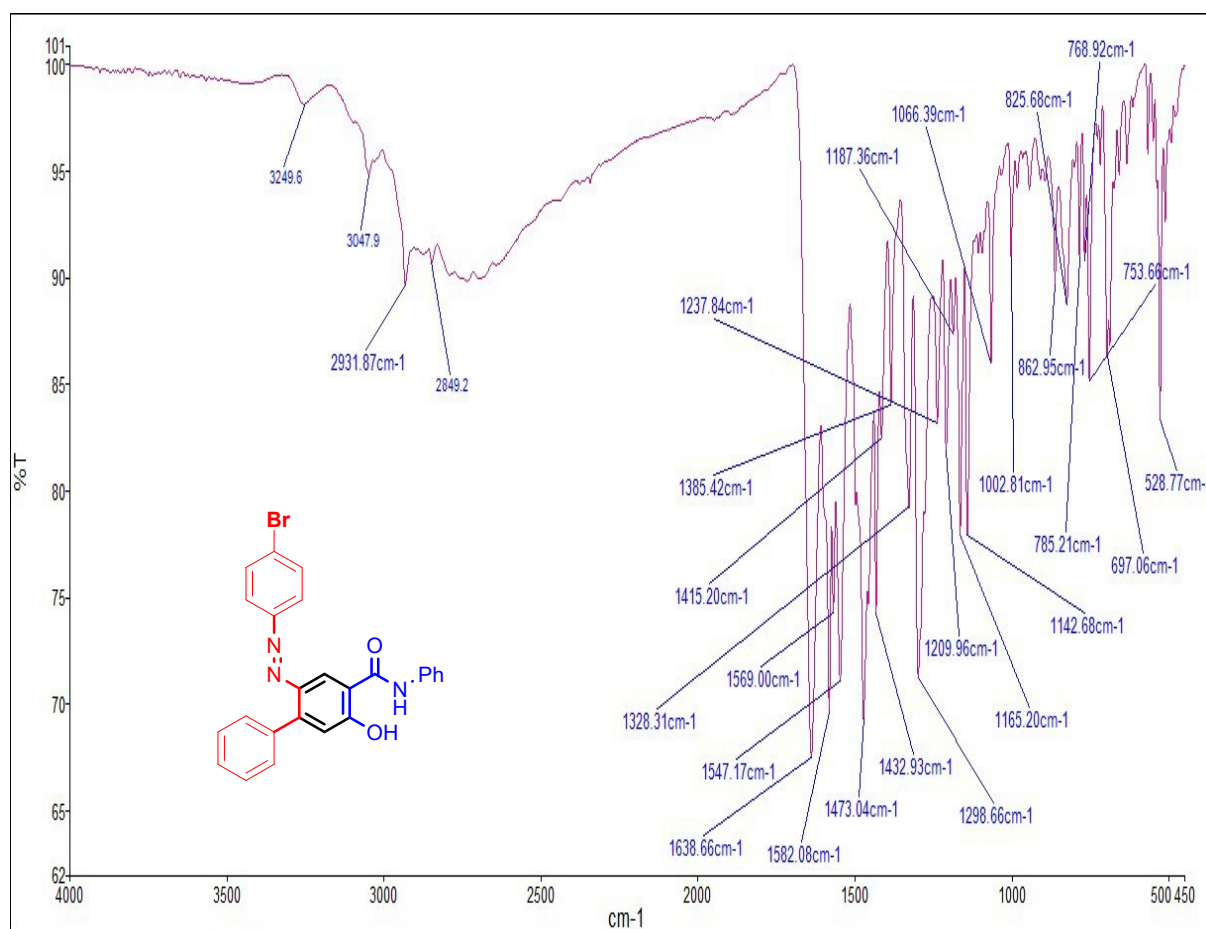

FT-IR spectrum of compound 3n

**5-Hydroxy-2-(2-nitrophenylazo)-N-phenyl-[1,1'-biphenyl]-4-carboxamide (3o)**

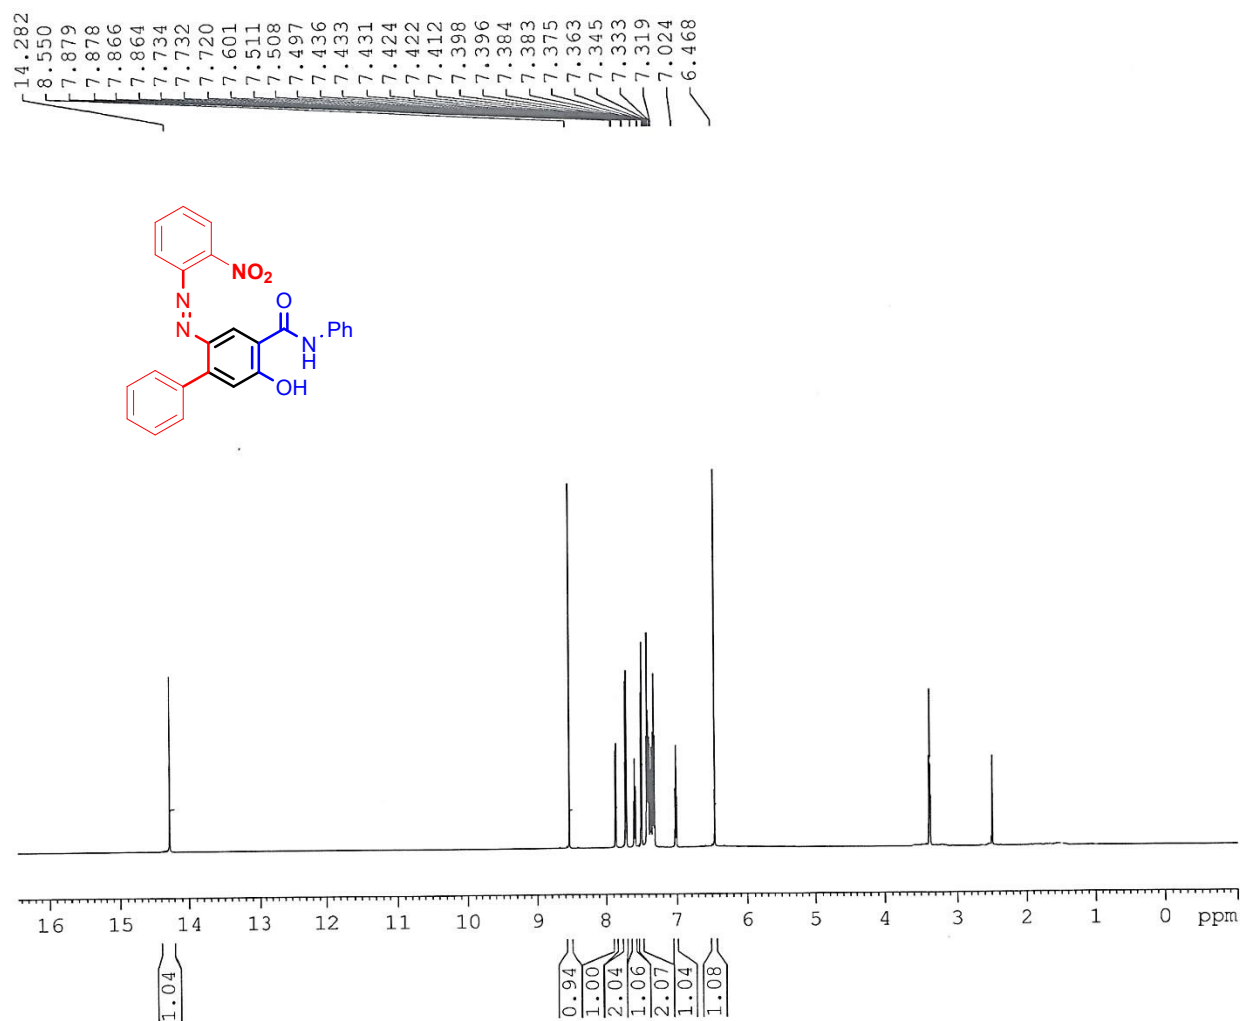

**<sup>1</sup>H NMR spectrum of compound 3o**

# 5-Hydroxy-2-(2-nitrophenylazo)-N-phenyl-[1,1'-biphenyl]-4-carboxamide (3o)

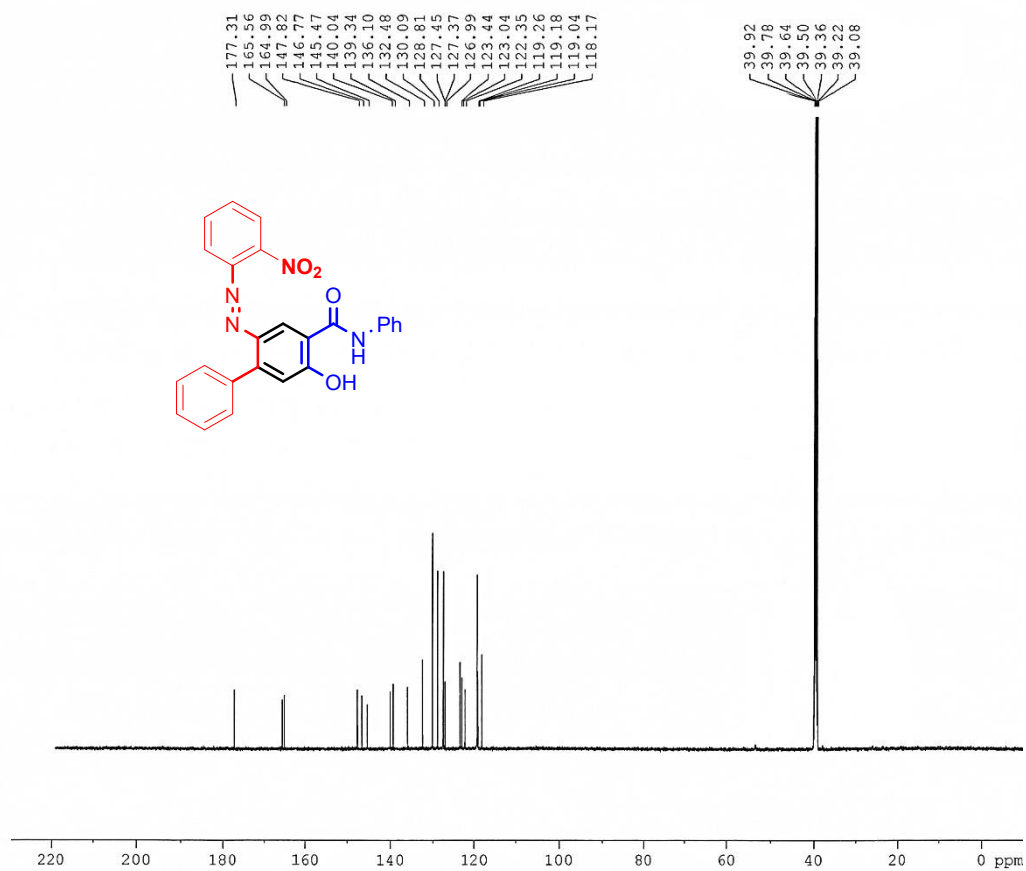

**<sup>13</sup>C NMR spectrum of compound 3o**

HRMS-10DH r-mass1 #273 RT: 8.24 AV: 1 NL: 7.32E4  
T: + c EI Full ms [404.50-460.50]

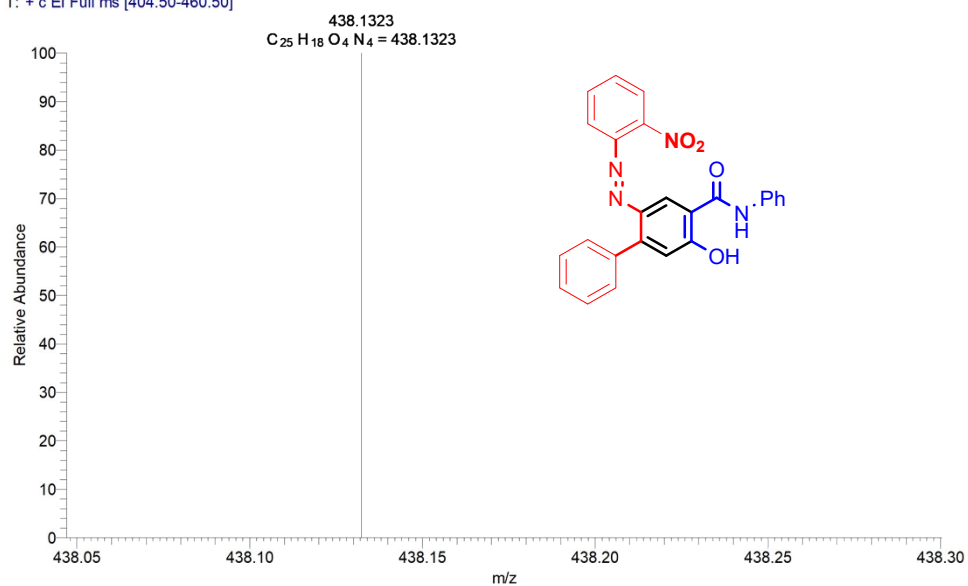

**HRMS spectrum of compound 3o**

**2-(4-Bromophenyl)-3-methyl-8-(4-nitrophenyl)-6-oxo-*N*<sup>4</sup>,*N*<sup>5</sup>-diphenyl-2,6-dihydrocinnoline-4,5-dicarboxamide (4a)**

<sup>1</sup>H spectra Dr.Hamad 104HW in DMSO

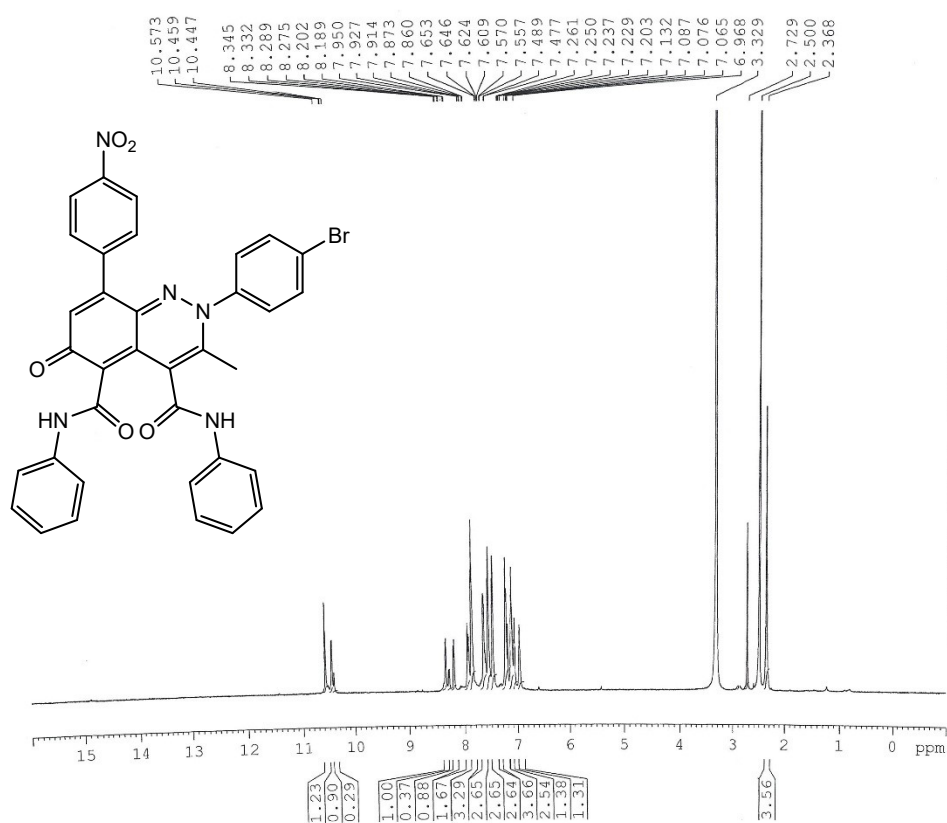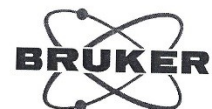

Current Data Parameters  
NAME 104HW  
EXPNO 1  
PROCNO 1

F2 - Acquisition Parameters  
Date 20170621  
Time 11.57  
INSTRUM spect  
PROBHD 5 mm PABBO BB-  
PULPROG zg30  
TD 65536  
SOLVENT DMSO  
NS 16  
DS 2  
SWH 12335.526 Hz  
FIDRES 0.188225 Hz  
AQ 2.6563926 sec  
RG 203  
DW 40.533 usec  
DE 20.00 usec  
TE 298.0 K  
D1 1.00000000 sec  
TD0 1

===== CHANNEL f1 =====  
SFO1 600.1337060 MHz  
NUC1 1H  
P1 10.60 usec  
PLW1 27.82500076 W

F2 - Processing parameters  
SI 32768  
SF 600.1300000 MHz  
WDW EM  
SSB 0  
LB 0.30 Hz  
GB 0  
PC 1.00

**<sup>1</sup>H NMR spectrum of compound 4a**

**2-(4-Bromophenyl)-3-methyl-8-(4-nitrophenyl)-6-oxo-*N*<sup>4</sup>,*N*<sup>5</sup>-diphenyl-2,6-dihydrocinnoline-4,5-dicarboxamide (4a)**

<sup>13</sup>C decoupled spectra Dr.Hamad 104HW in DMSO

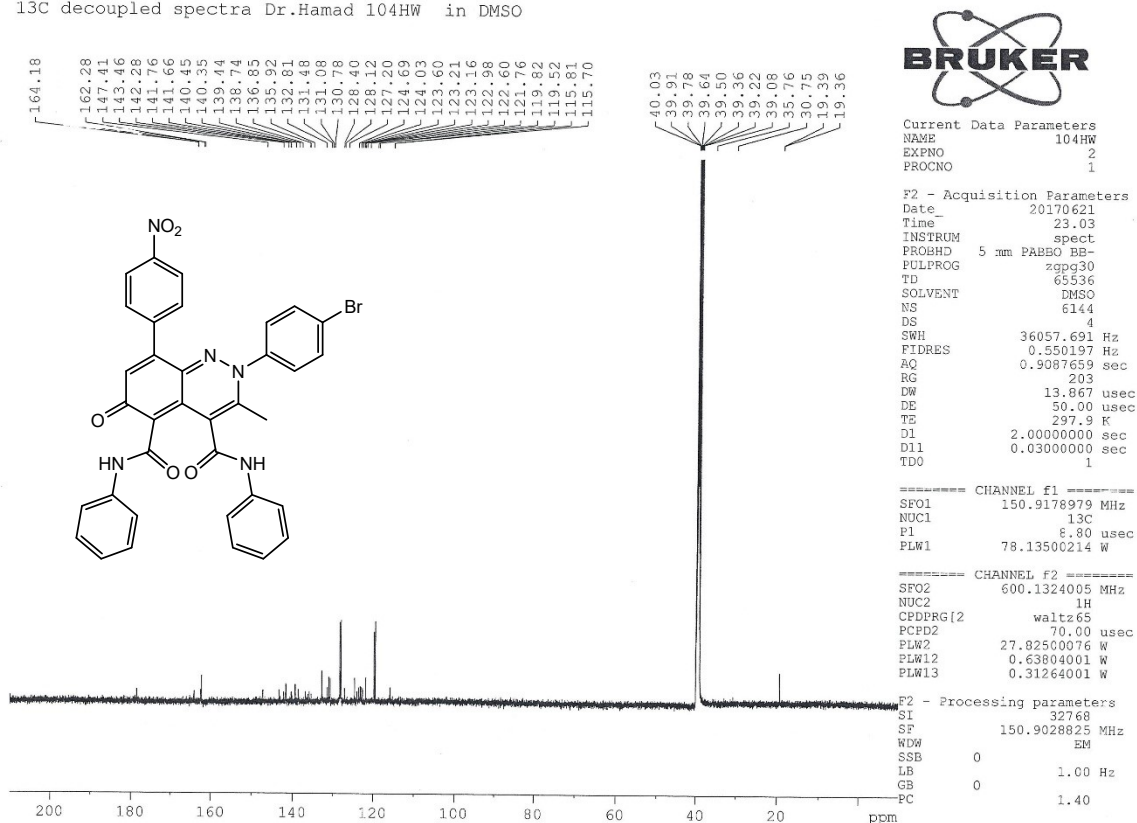

**<sup>13</sup>C NMR spectrum of compound 4a**

**2-(4-Chlorophenyl)-3-methyl-8-(4-nitrophenyl)-6-oxo-*N*<sup>4</sup>,*N*<sup>5</sup>-diphenyl-2,6-dihydrocinnoline-4,5-dicarboxamide (4b)**

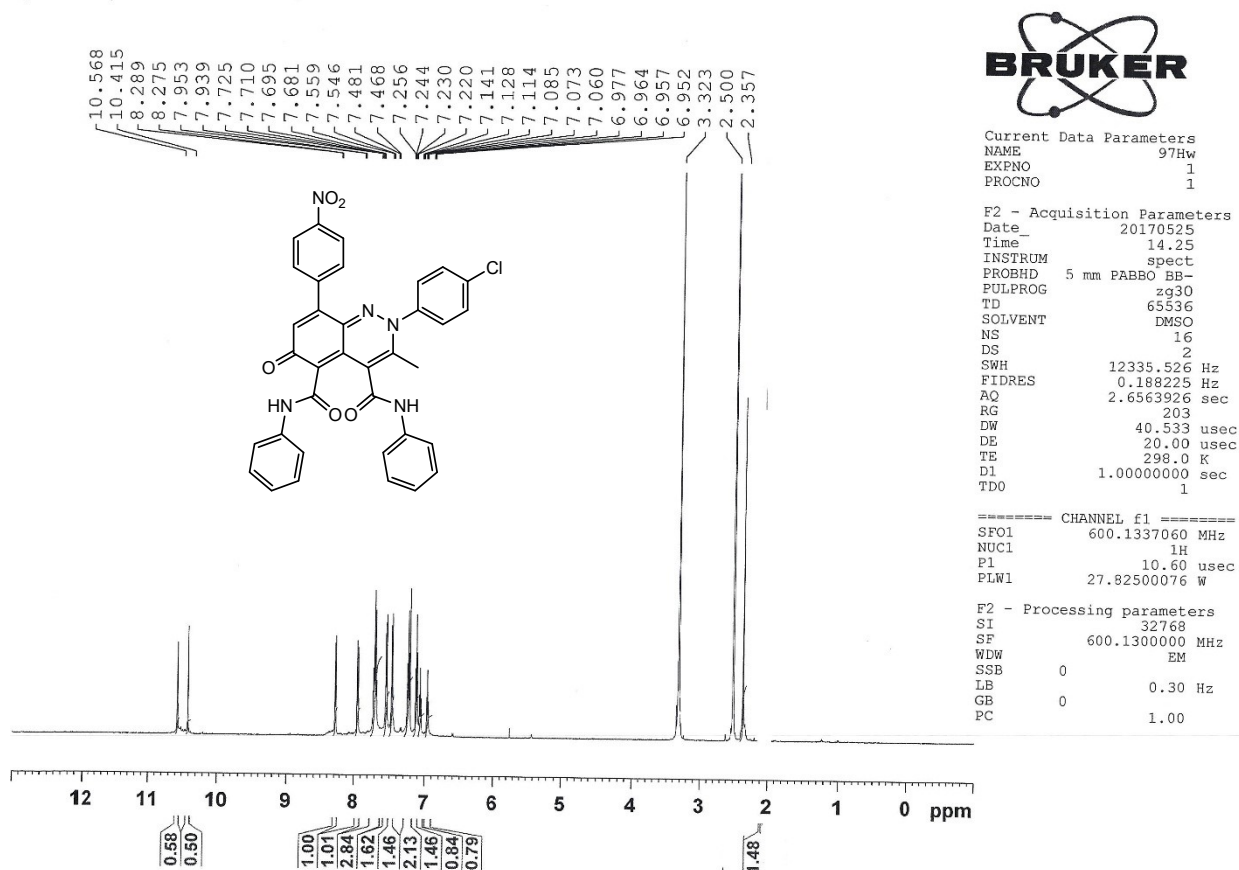

**<sup>1</sup>H NMR spectrum of compound 4b**

**2-(4-Chlorophenyl)-3-methyl-8-(4-nitrophenyl)-6-oxo-*N*<sup>4</sup>,*N*<sup>5</sup>-diphenyl-2,6-dihydrocinnoline-4,5-dicarboxamide (4b)**

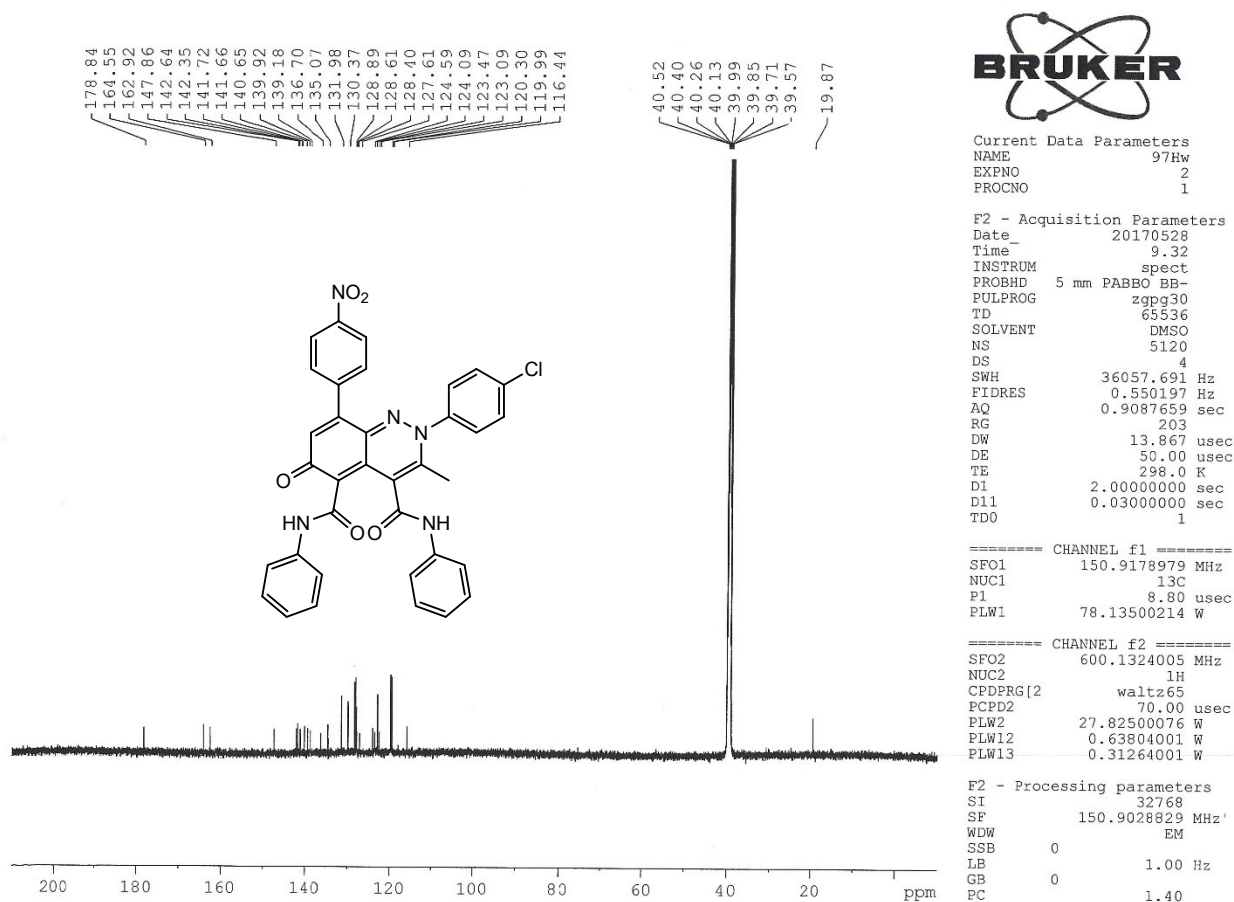

**<sup>13</sup>C NMR spectrum of compound 4b**

**2-(3-Chlorophenyl)-3-methyl-8-(4-nitrophenyl)-6-oxo-*N*<sup>4</sup>,*N*<sup>5</sup>-diphenyl-2,6-dihydrocinnoline-4,5-dicarboxamide (4c)**

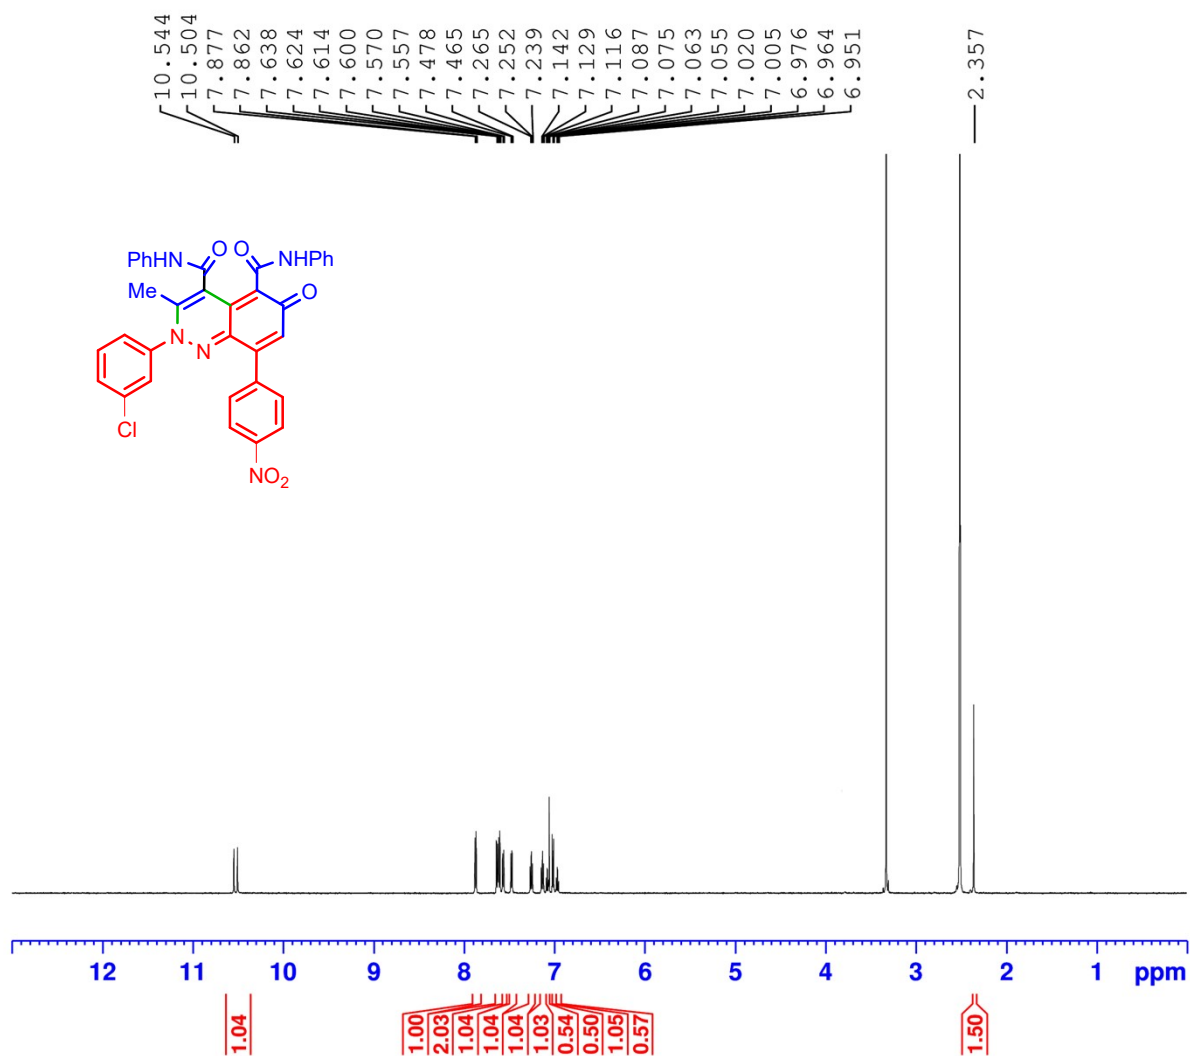

**<sup>1</sup>H NMR spectrum of compound 4c**

**2-(3-Chlorophenyl)-3-methyl-8-(4-nitrophenyl)-6-oxo-*N*<sup>4</sup>,*N*<sup>5</sup>-diphenyl-2,6-dihydrocinnoline-4,5-dicarboxamide (4c)**

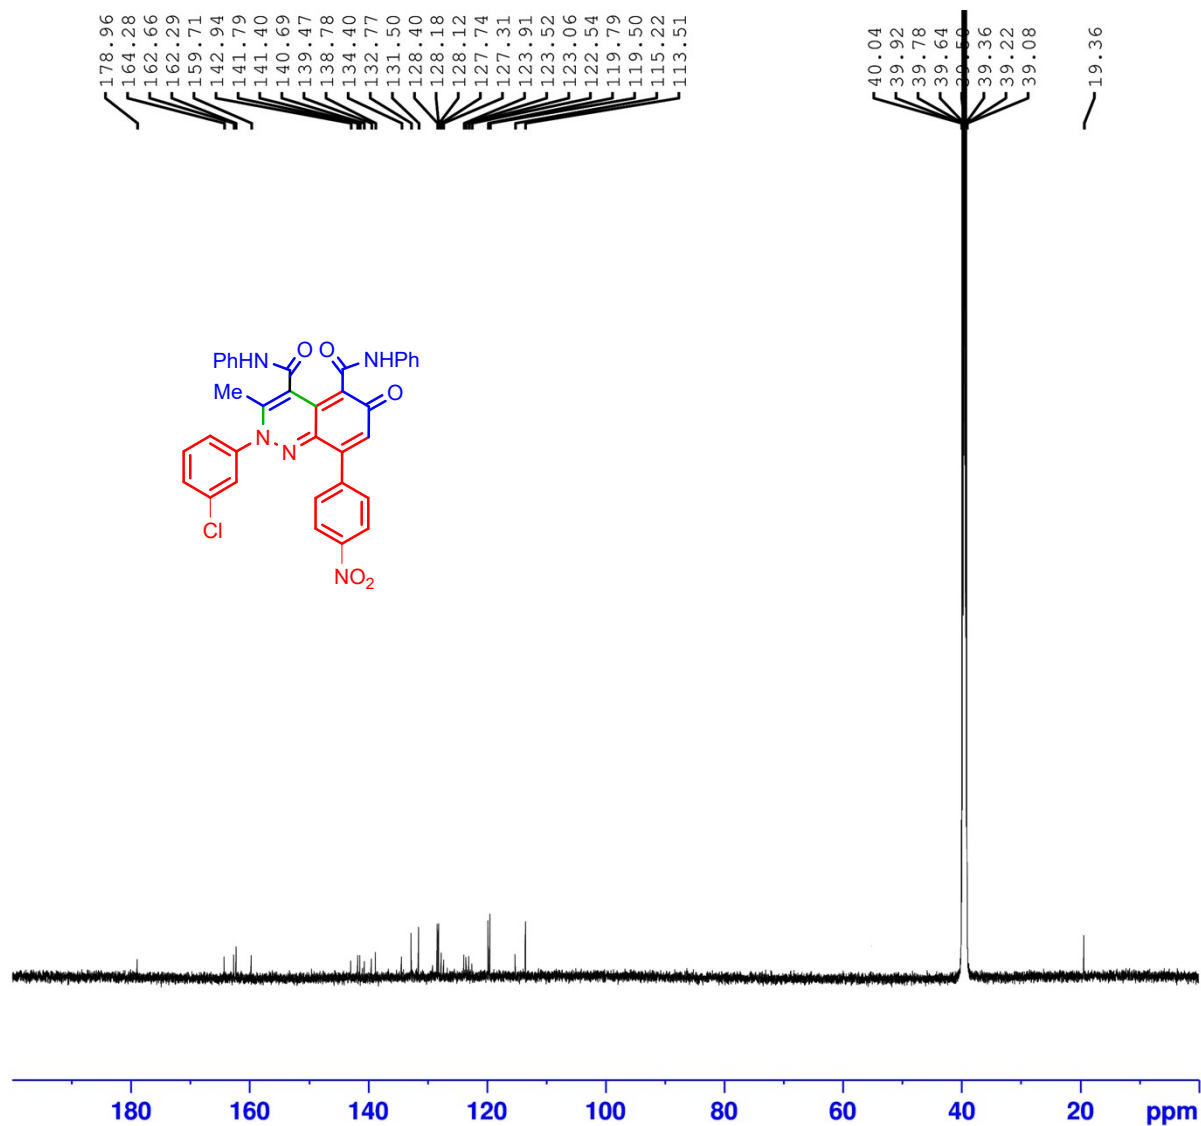

**<sup>13</sup>C NMR spectrum of compound 4c**

**3-methyl-2-(4-nitrophenyl)-6-oxo-*N*<sup>4</sup>,*N*<sup>5</sup>,8-triphenyl-2,6-dihydrocinnoline-4,5-dicarboxamide (4d)**

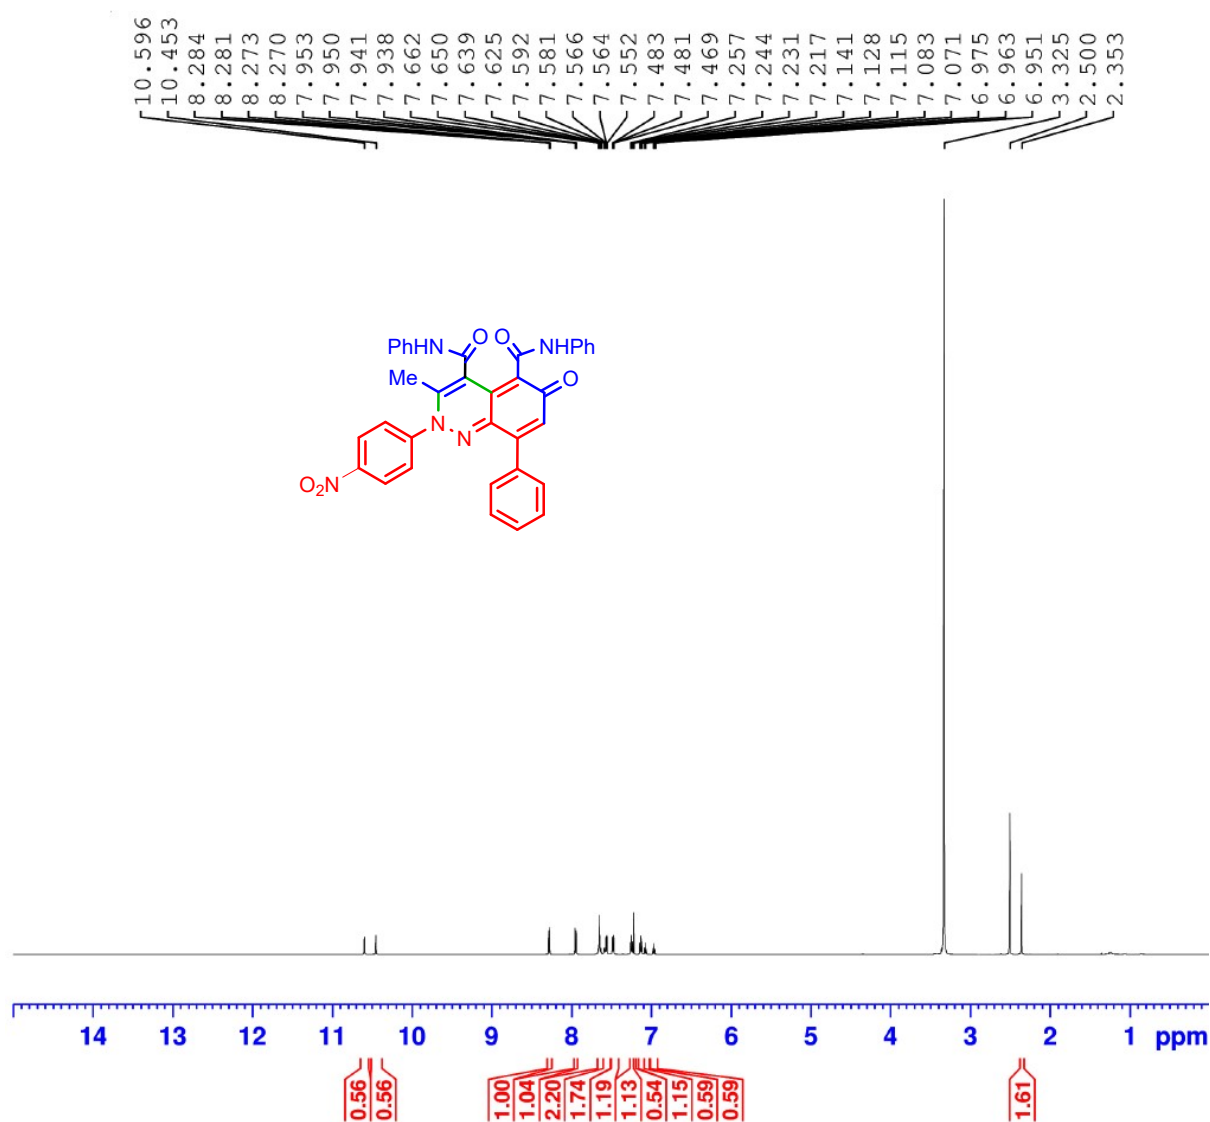

**<sup>1</sup>H NMR spectrum of compound 4d**

**3-methyl-2-(4-nitrophenyl)-6-oxo-*N*<sup>4</sup>,*N*<sup>5</sup>,8-triphenyl-2,6-dihydrocinnoline-4,5-dicarboxamide (4d)**

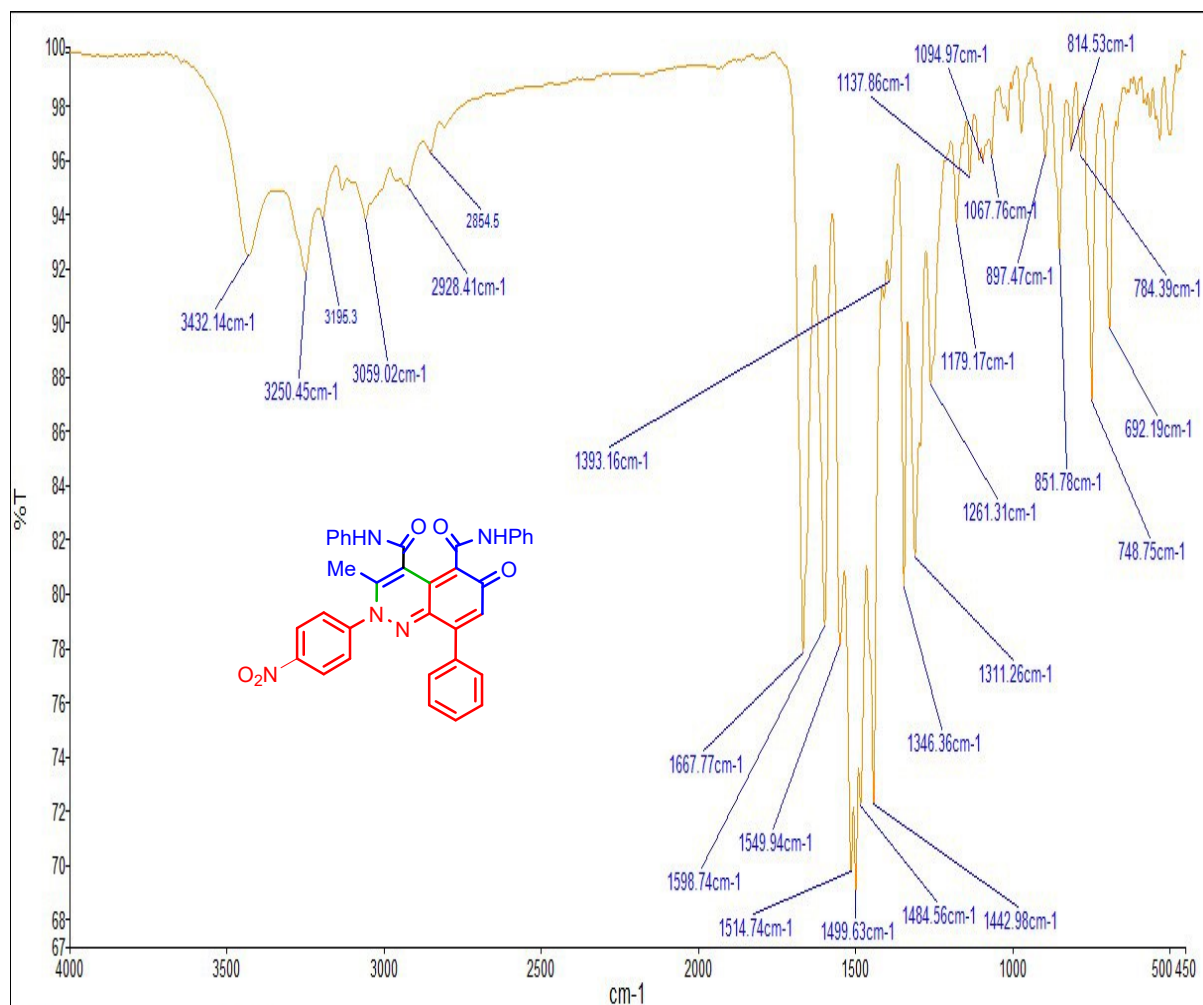

**FT-IR spectrum of compound 4d**

8-(4-Chlorophenyl)-3-methyl-6-oxo-*N*<sup>4</sup>,*N*<sup>5</sup>,2-triphenyl-2,6-dihydrocinnoline-4,5-dicarboxamide (4e)

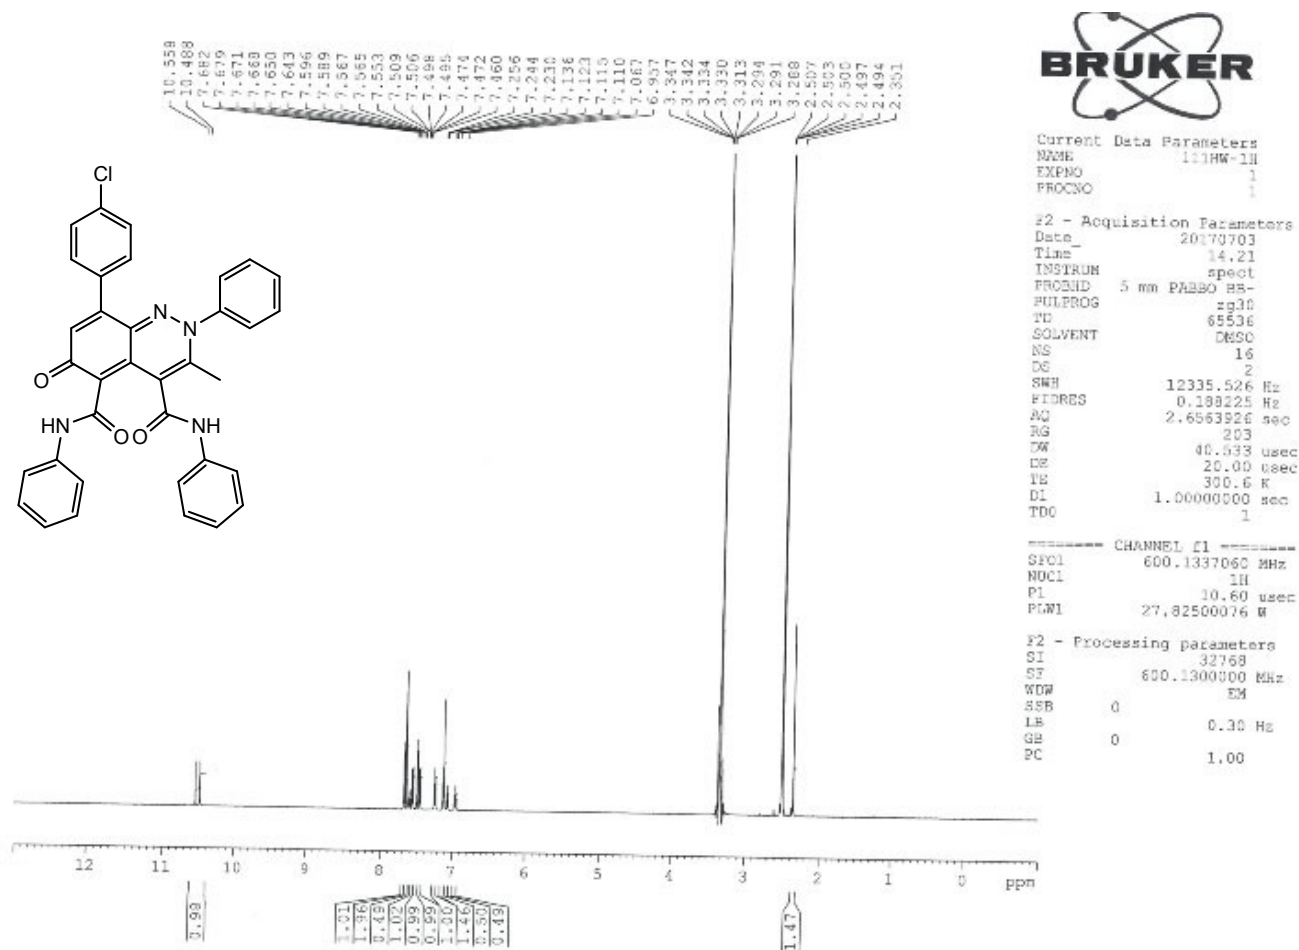

<sup>1</sup>H NMR spectrum of compound 4e

**2-(4-Bromophenyl)-8-(4-chlorophenyl)-3-methyl-6-oxo-*N*<sup>4</sup>,*N*<sup>5</sup>-diphenyl-2,6-dihydrocinnoline-4,5-dicarboxamide (4f)**

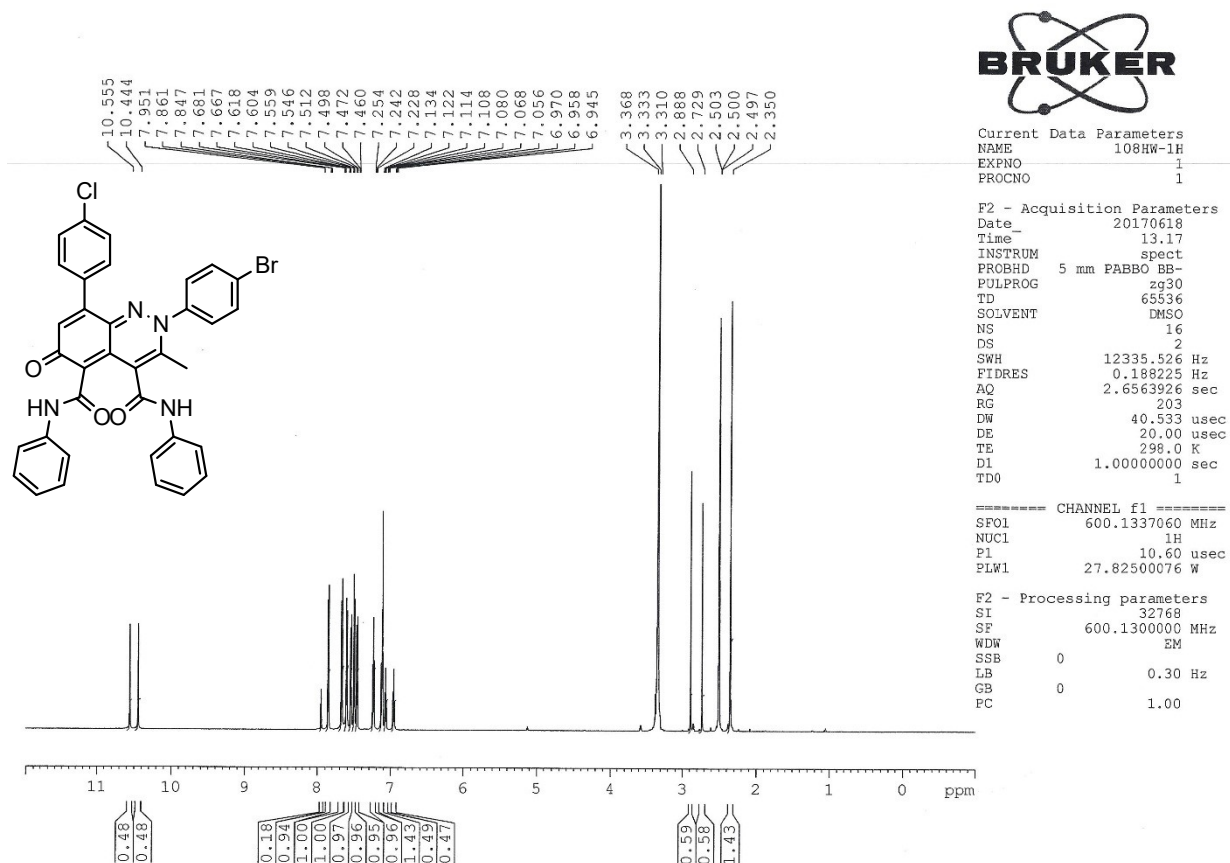

**<sup>1</sup>H NMR spectrum of compound 4f**

**2-(4-Bromophenyl)-8-(4-chlorophenyl)-3-methyl-6-oxo-*N*<sup>4</sup>,*N*<sup>5</sup>-diphenyl-2,6-dihydrocinnoline-4,5-dicarboxamide (4f)**

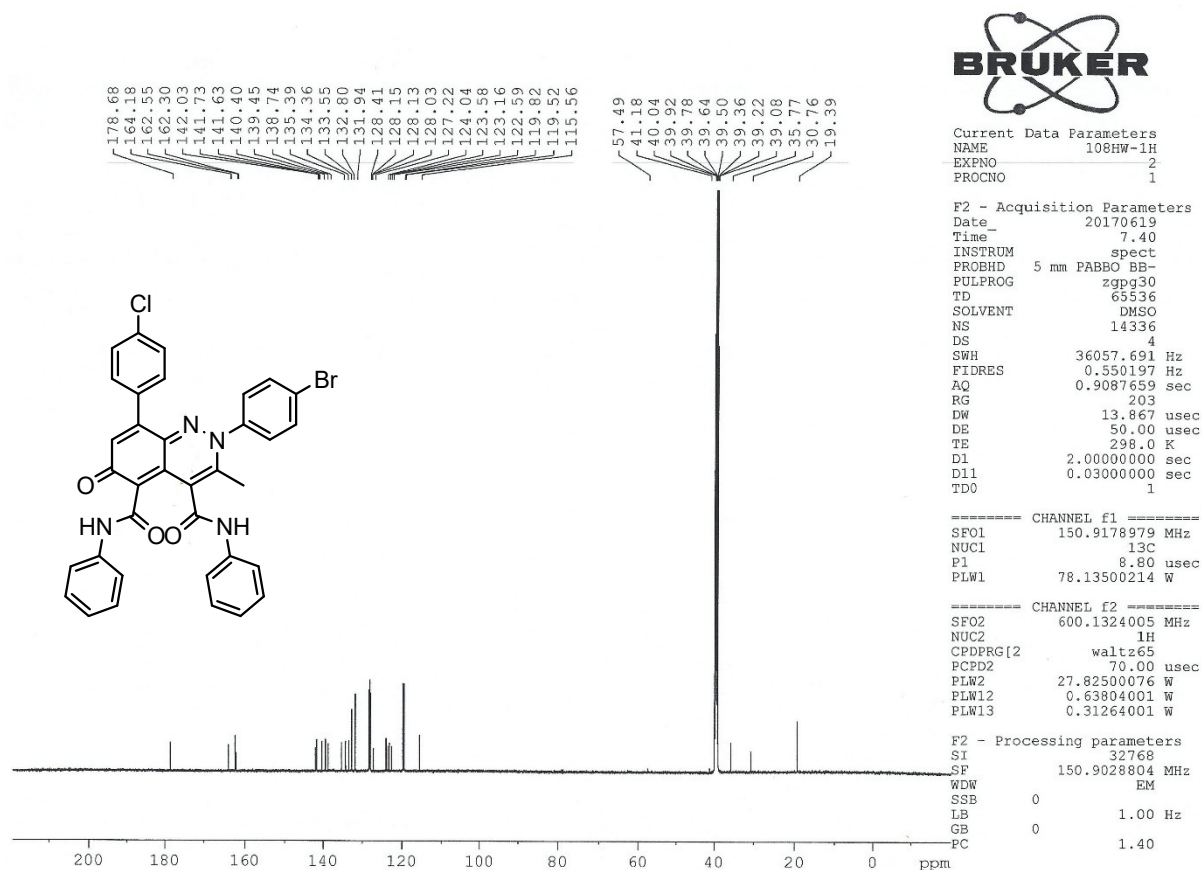

**<sup>13</sup>C NMR spectrum of compound 4f**

**8-(4-Bromophenyl)-2-(4-chlorophenyl)-3-methyl-6-oxo-*N*<sup>4</sup>,*N*<sup>5</sup>-diphenyl-2,6-dihydrocinnoline-4,5-dicarboxamide (4g)**

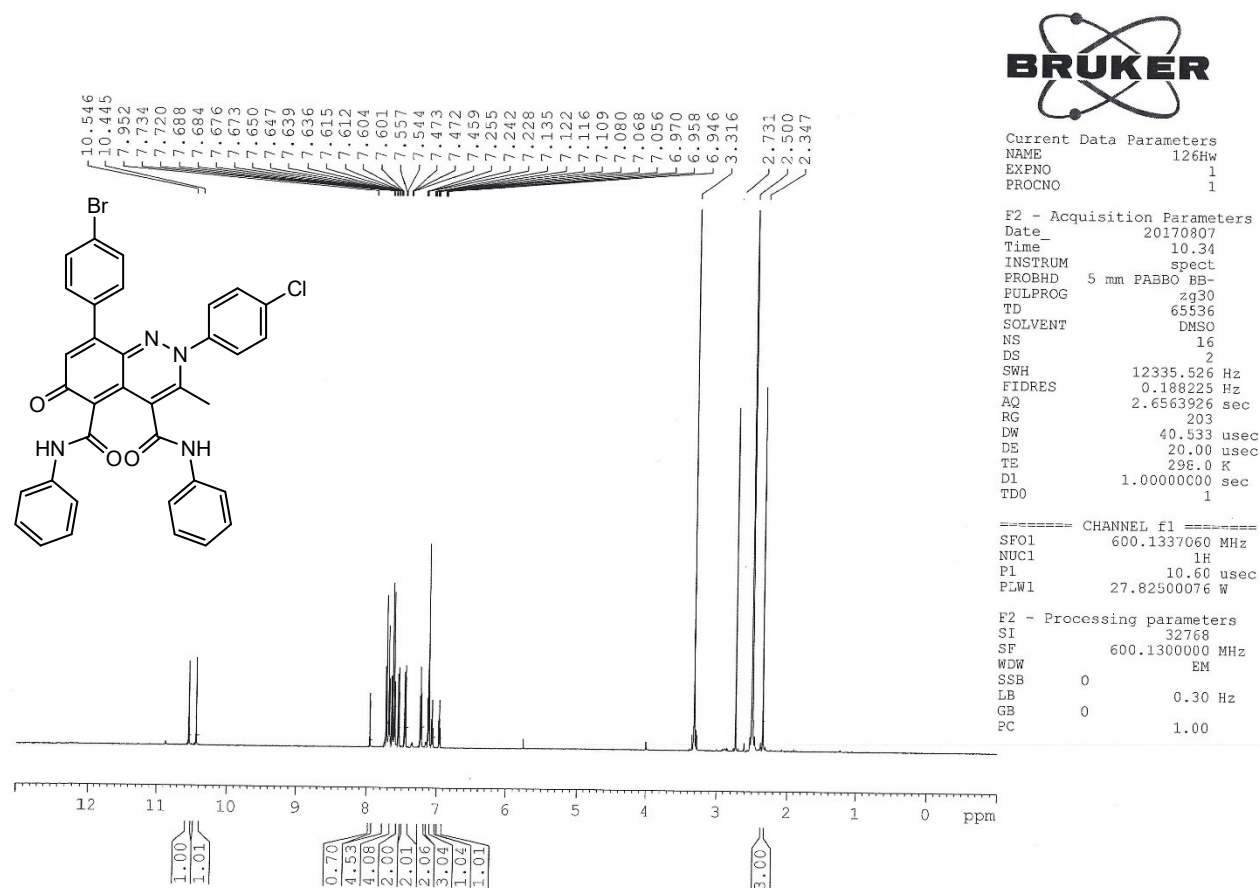

**<sup>1</sup>H NMR spectrum of compound 4g**

**8-(4-Bromophenyl)-2-(4-chlorophenyl)-3-methyl-6-oxo-*N*<sup>4</sup>,*N*<sup>5</sup>-diphenyl-2,6-dihydrocinnoline-4,5-dicarboxamide (4g)**

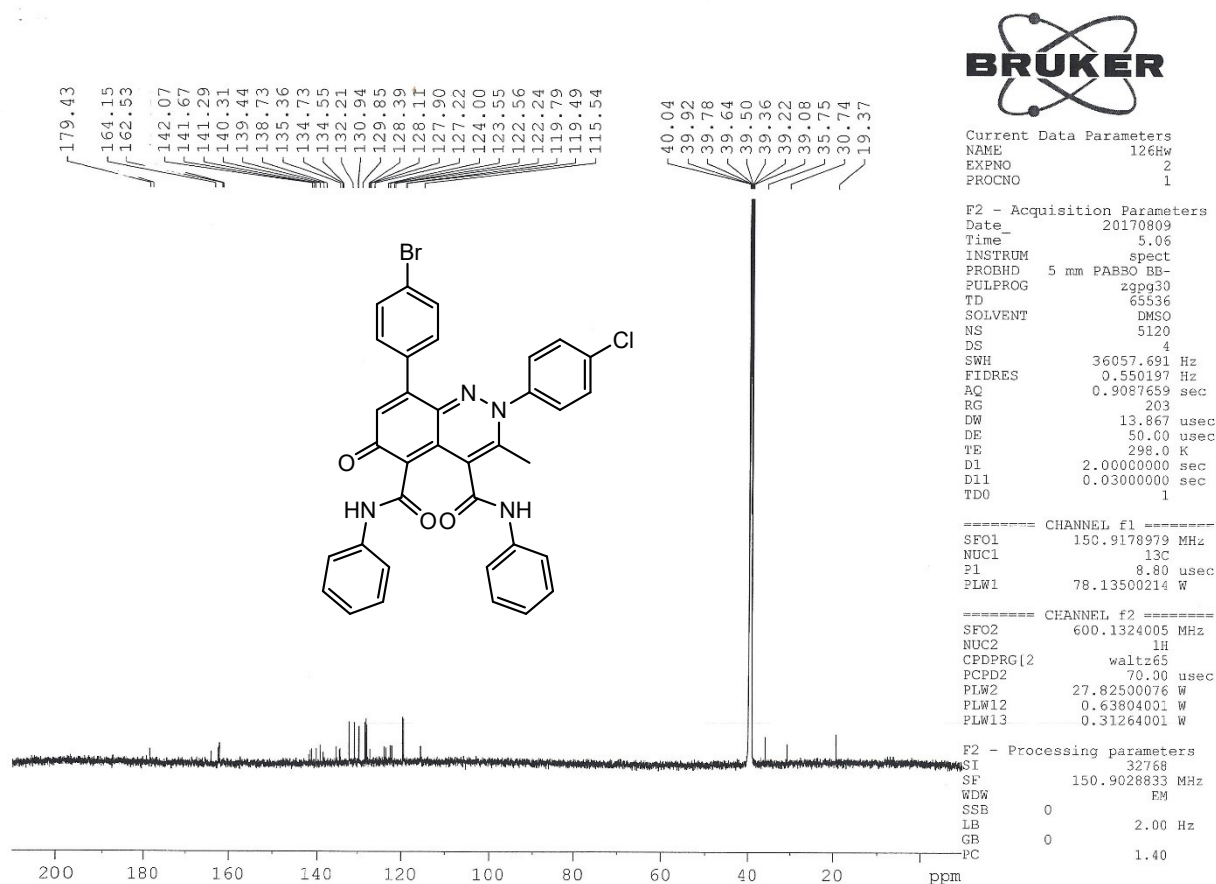

**<sup>13</sup>C NMR spectrum of compound 4g**

**2,8-Di(4-bromophenyl)-3-methyl-6-oxo-*N*<sup>4</sup>,*N*<sup>5</sup>-diphenyl-2,6-dihydrocinnoline-4,5-dicarboxamide (4h)**

<sup>1</sup>H spectra Dr.Hamad 129HW in DMSO

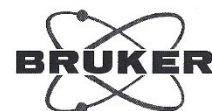

Current Data Parameters  
NAME 129HW  
EXPNO 1  
PROCNO 1

F2 - Acquisition Parameters  
Date 20170807  
Time 10.40  
INSTRUM spect  
PROBHD 5 mm PABBO BB-  
PULPROG zg30  
TD 65536  
SOLVENT DMSO  
NS 16  
DS 2  
SWH 12335.526 Hz  
FIDRES 0.188225 Hz  
AQ 2.6563926 sec  
RG 203  
DW 40.533 usec  
DE 20.00 usec  
TE 298.0 K  
D1 1.00000000 sec  
TD0 1

===== CHANNEL f1 =====  
SFO1 600.1337060 MHz  
NUC1 1H  
P1 10.60 usec  
PLW1 27.82500076 W

F2 - Processing parameters  
SI 32768  
SF 600.1300000 MHz  
WDW EM  
SSB 0  
LB 0.30 Hz  
GB 0  
PC 1.00

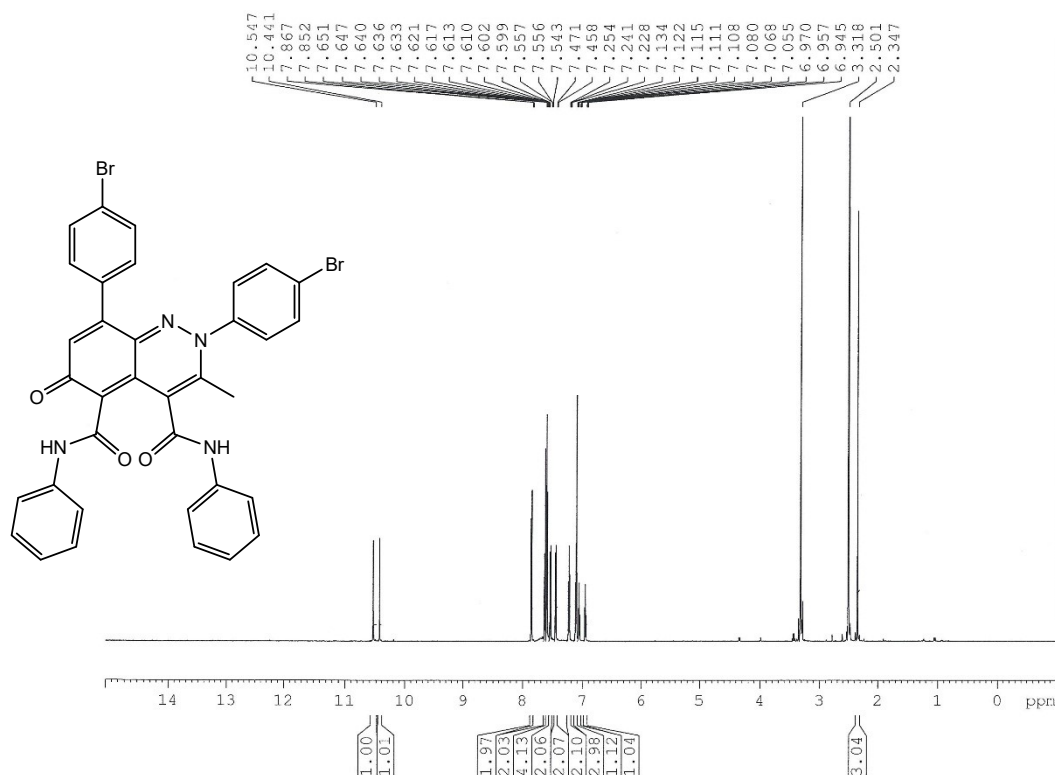

**<sup>1</sup>H NMR spectrum of compound 4h**

**2,8-Di(4-bromophenyl)-3-methyl-6-oxo-*N*<sup>4</sup>,*N*<sup>5</sup>-diphenyl-2,6-dihydrocinnoline-4,5-dicarboxamide (4h)**

<sup>13</sup>C decoupled spectra Dr.Hamad 129HW in DMSO

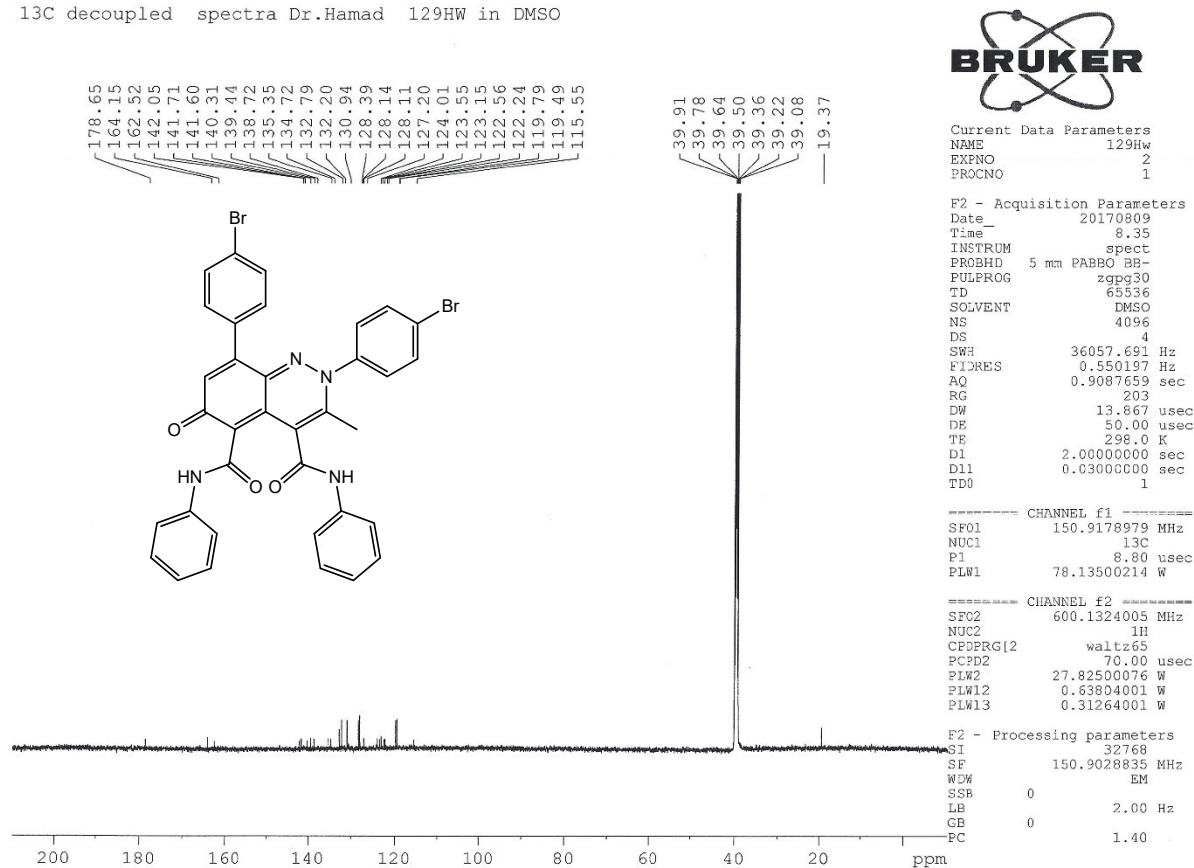

**<sup>13</sup>C NMR spectrum of compound 4h**

**2-(4-Chlorophenyl)-8-(4-fluorophenyl)-3-methyl-6-oxo-*N*<sup>4</sup>,*N*<sup>5</sup>-diphenyl-2,6-dihydrocinnoline-4,5-dicarboxamide (4i)**

<sup>1</sup>H spectra Dr.Hamad 138 HW in DMSO

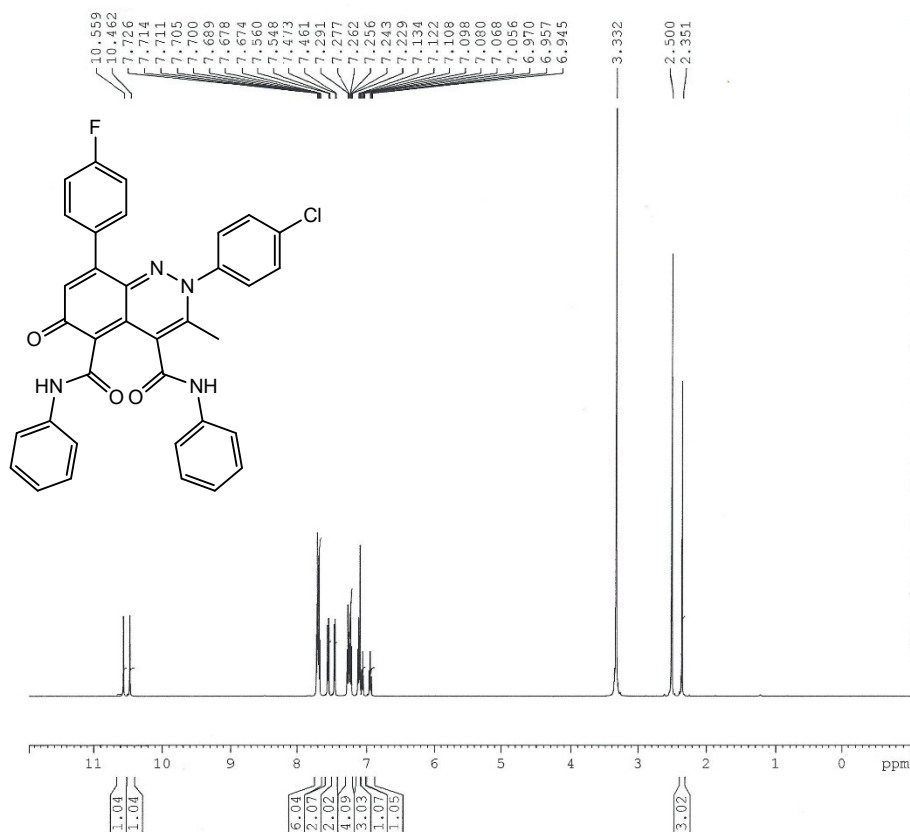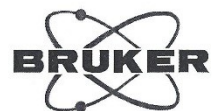

Current Data Parameters  
NAME 138HW  
EXPNO 1  
PROCNO 1

F2 - Acquisition Parameters  
Date\_ 20171022  
Time\_ 12.20  
INSTRUM spect  
PROBHD 5 mm PABBO BB-  
PULPROG zg30  
TD 65536  
SOLVENT DMSO  
NS 16  
DS 2  
SWH 12335.526 Hz  
FIDRES 0.188225 Hz  
AQ 2.6563926 sec  
RG 203  
DW 40.533 usec  
DE 20.00 usec  
TE 298.0 K  
D1 1.00000000 sec  
TD0 1

===== CHANNEL f1 =====  
SFO1 600.1337060 MHz  
NUC1 1H  
P1 10.60 usec  
PLW1 27.82500076 W

F2 - Processing parameters  
SI 32768  
SF 600.1300000 MHz  
WDW EM  
SSB 0  
LB 0.30 Hz  
GB 0  
PC 1.00

**<sup>1</sup>H NMR spectrum of compound 4i**

**2-(4-Chlorophenyl)-8-(4-fluorophenyl)-3-methyl-6-oxo-*N*<sup>4</sup>,*N*<sup>5</sup>-diphenyl-2,6-dihydrocinnoline-4,5-dicarboxamide (4i)**

<sup>13</sup>C decoupled spectrum Dr.Hamad 138 Hw in DMSO

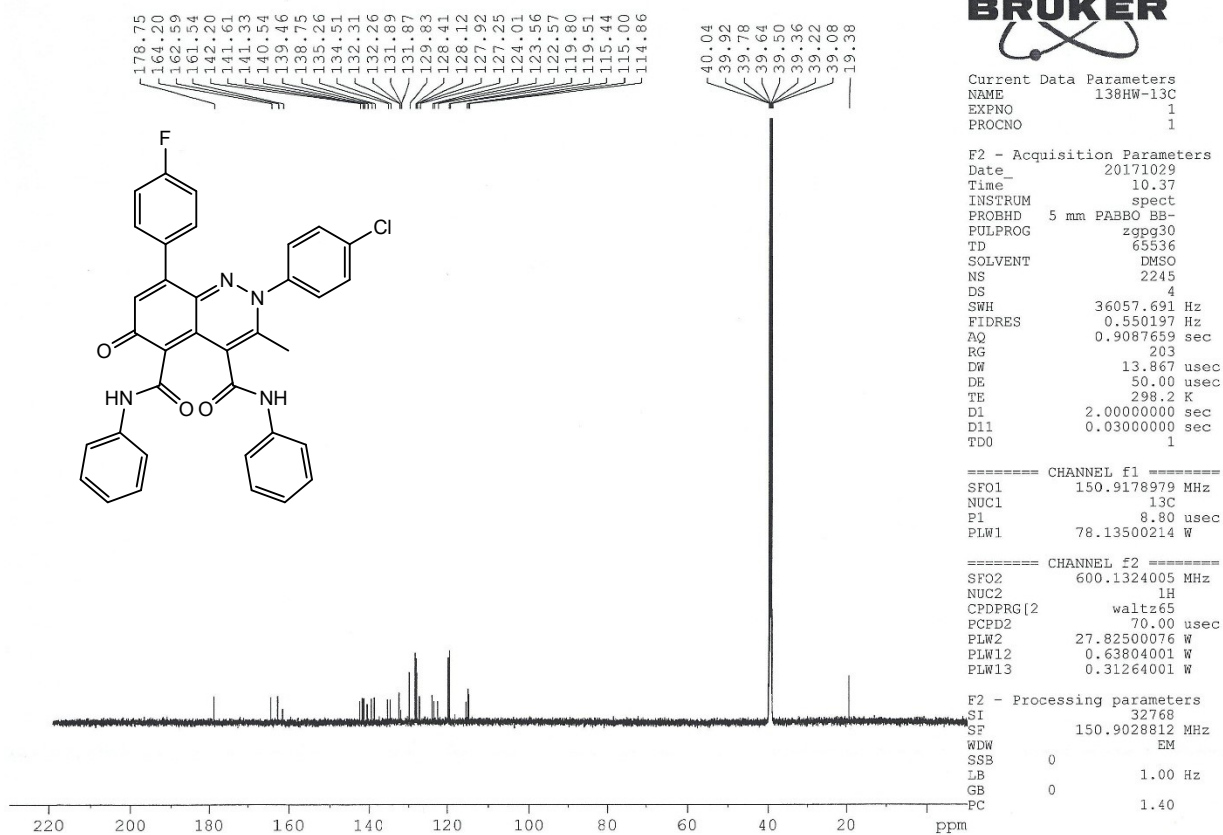

**<sup>13</sup>C NMR spectrum of compound 4i**

**2-(4-Bromophenyl)-8-(4-fluorophenyl)-3-methyl-6-oxo-*N*<sup>4</sup>,*N*<sup>5</sup>-diphenyl-2,6-dihydrocinnoline-4,5-dicarboxamide (4j)**

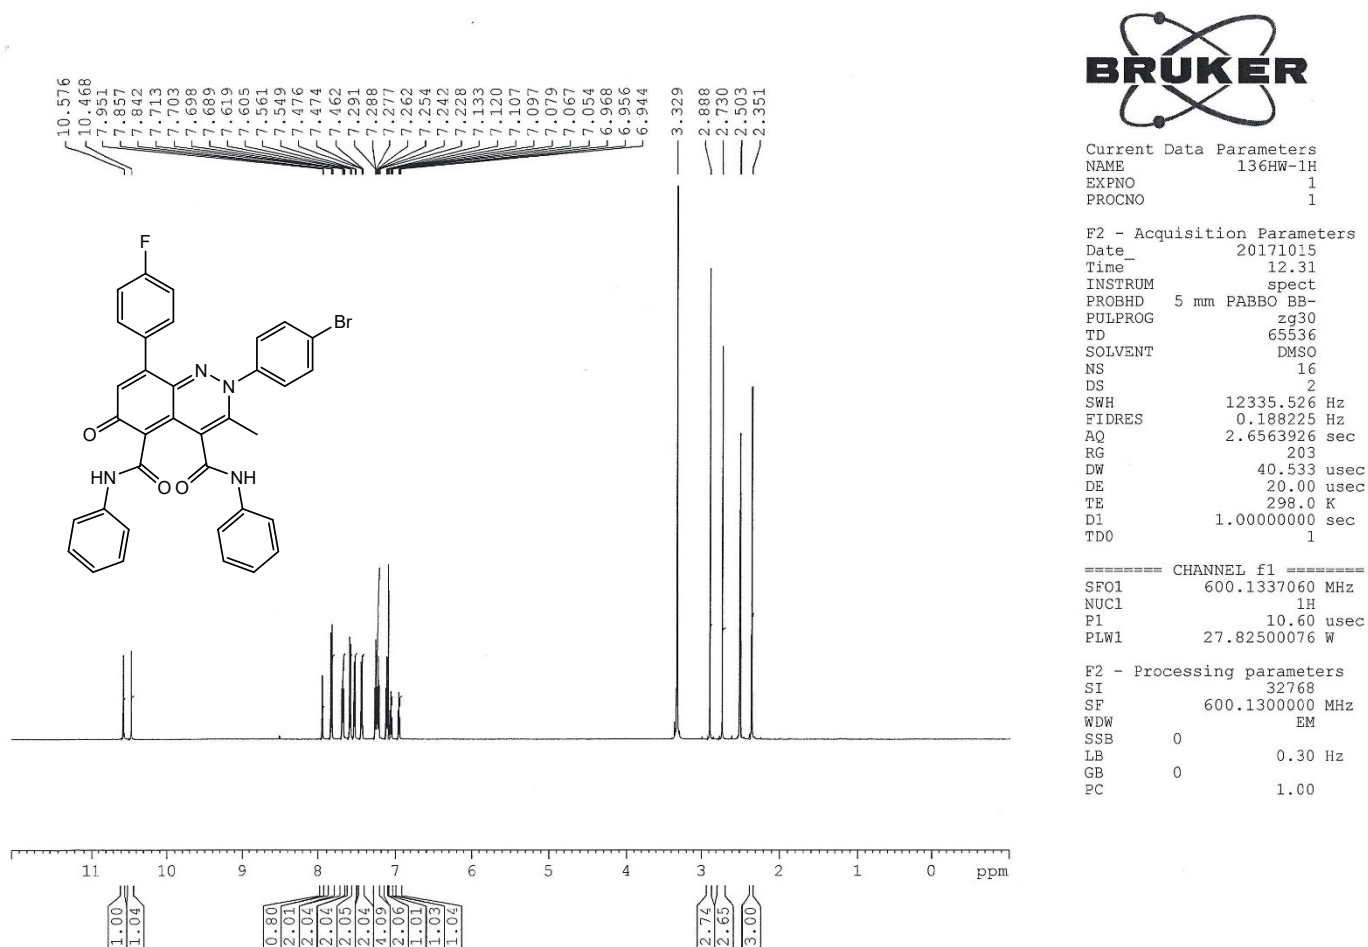

**<sup>1</sup>H NMR spectrum of compound 4j**

**2-(4-Bromophenyl)-8-(4-fluorophenyl)-3-methyl-6-oxo-*N*<sup>4</sup>,*N*<sup>5</sup>-diphenyl-2,6-dihydrocinnoline-4,5-dicarboxamide (4j)**

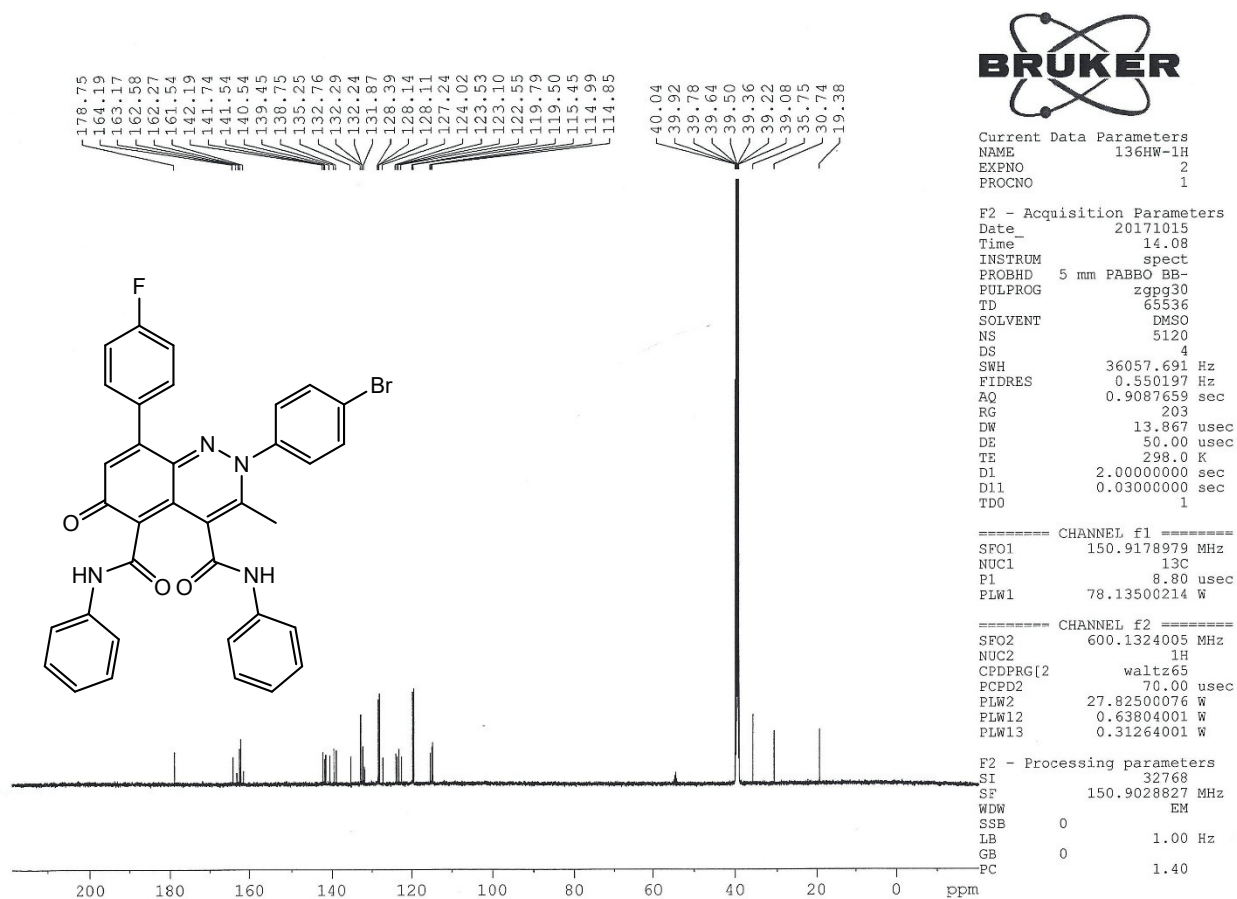

**<sup>13</sup>C NMR spectrum of compound 4j**

**8-(4-Anisyl)-2-(4-bromophenyl)-3-methyl-6-oxo-*N*<sup>4</sup>,*N*<sup>5</sup>-diphenyl-2,6-dihydrocinnoline-4,5-dicarboxamide (4k)**

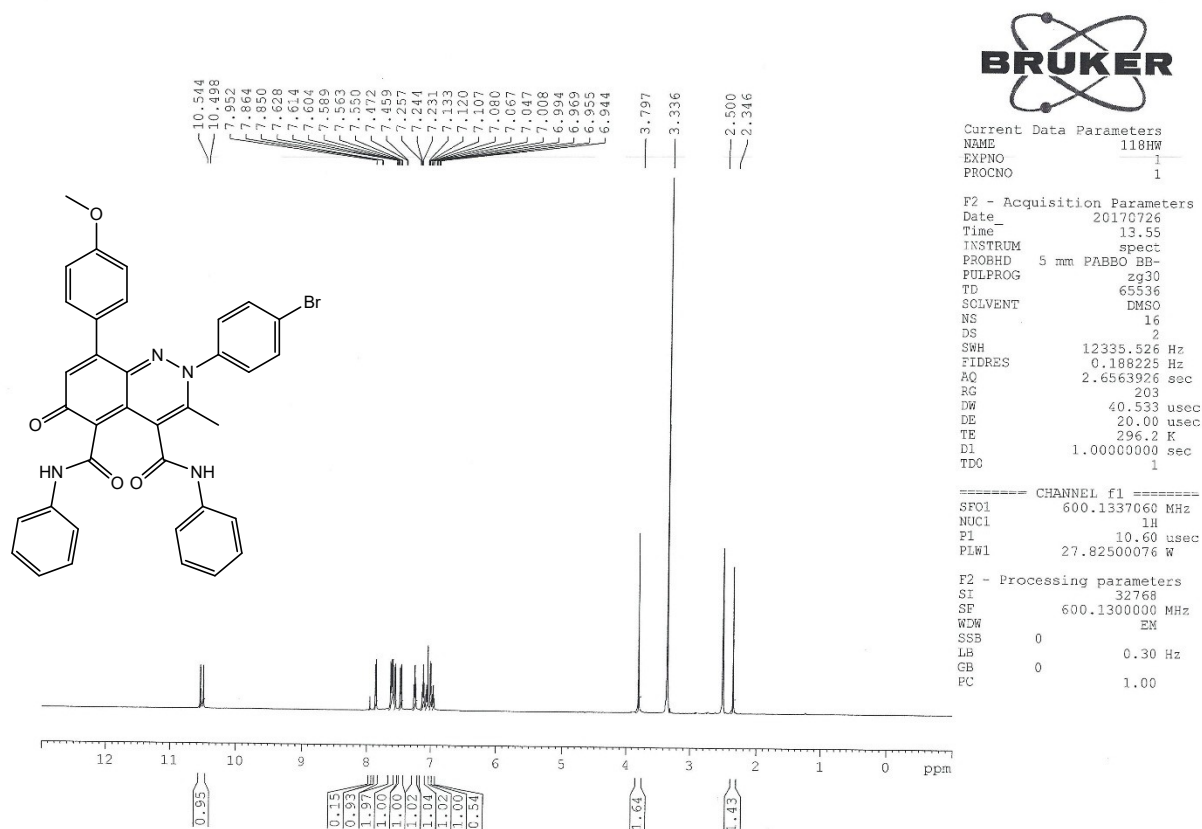

**<sup>1</sup>H NMR spectrum of compound 4k**

**8-(4-Anisyl)-2-(4-bromophenyl)-3-methyl-6-oxo-*N*<sup>4</sup>,*N*<sup>5</sup>-diphenyl-2,6-dihydrocinnoline-4,5-dicarboxamide (4k)**

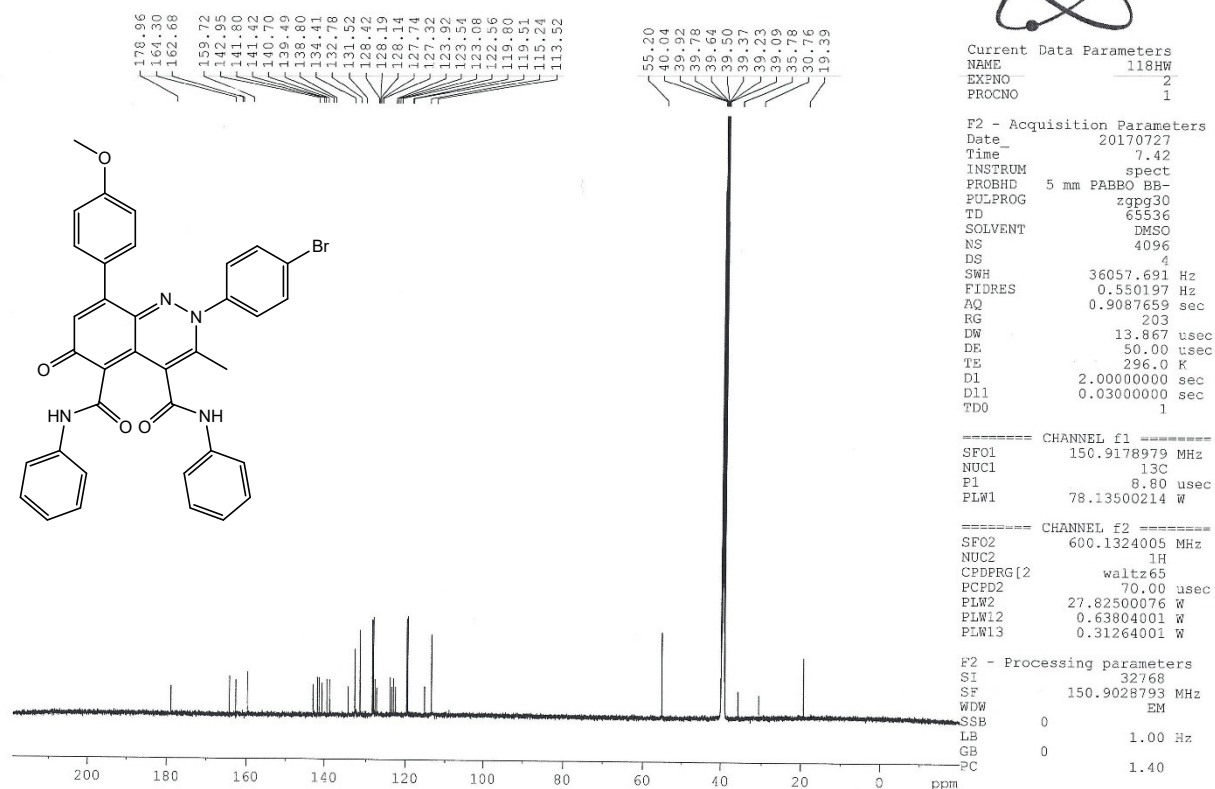

**<sup>13</sup>C NMR spectrum of compound 4k**

**8-(4-Anisyl)-3-methyl-2-(2-nitrophenyl)-6-oxo-*N*<sup>4</sup>,*N*<sup>5</sup>-diphenyl-2,6-dihydrocinnoline-4,5-dicarboxamide (4l)**

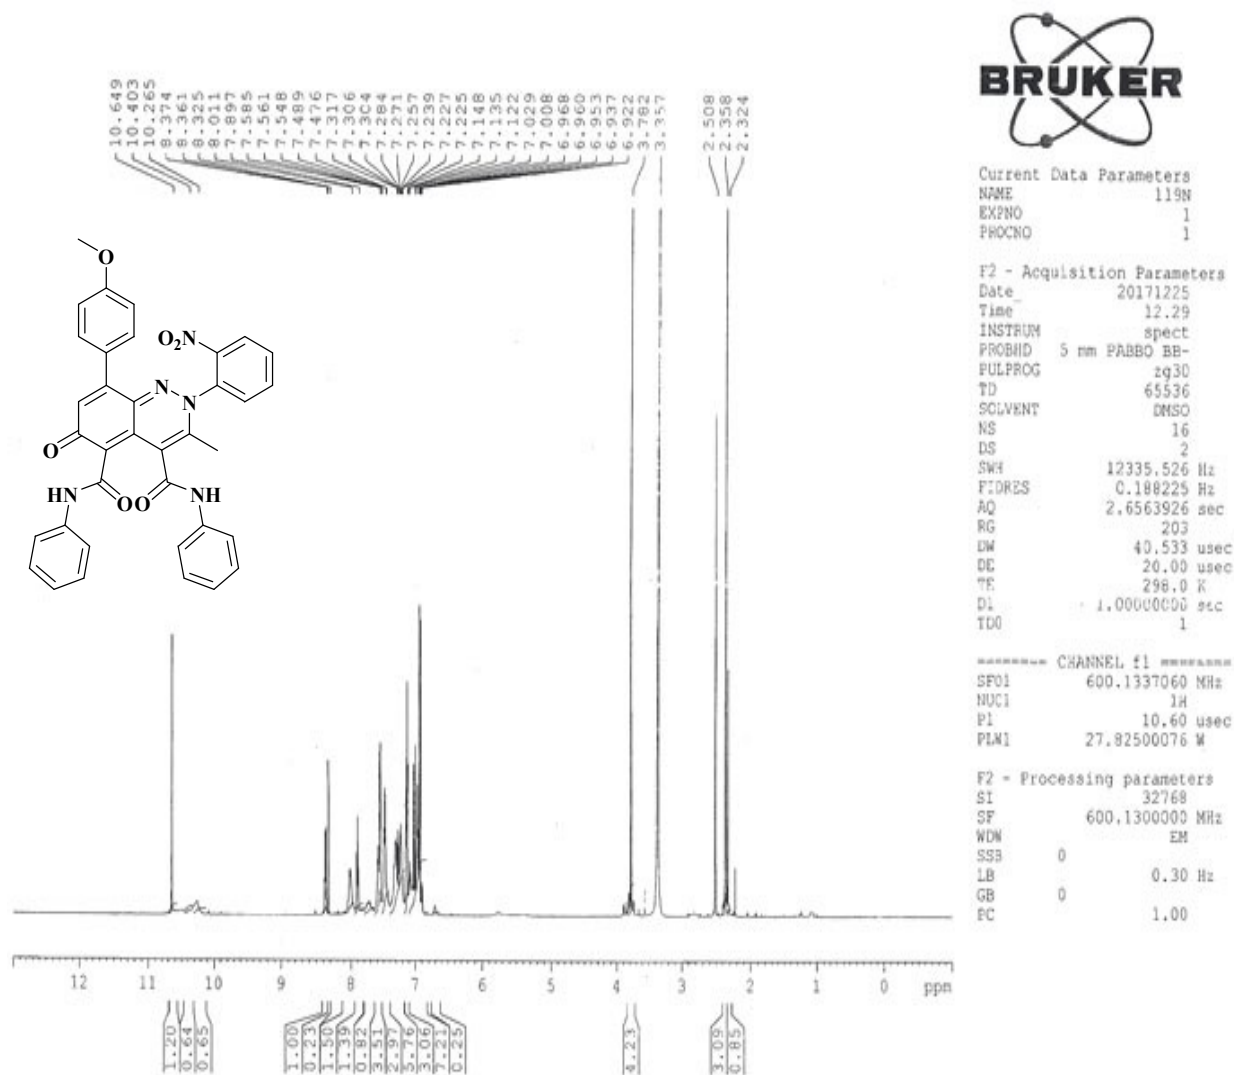

**<sup>1</sup>H NMR spectrum of compound 4l**

**8-(4-Anisyl)-3-methyl-2-(2-nitrophenyl)-6-oxo-*N*<sup>4</sup>,*N*<sup>5</sup>-diphenyl-2,6-dihydrocinnoline-4,5-dicarboxamide (4l)**

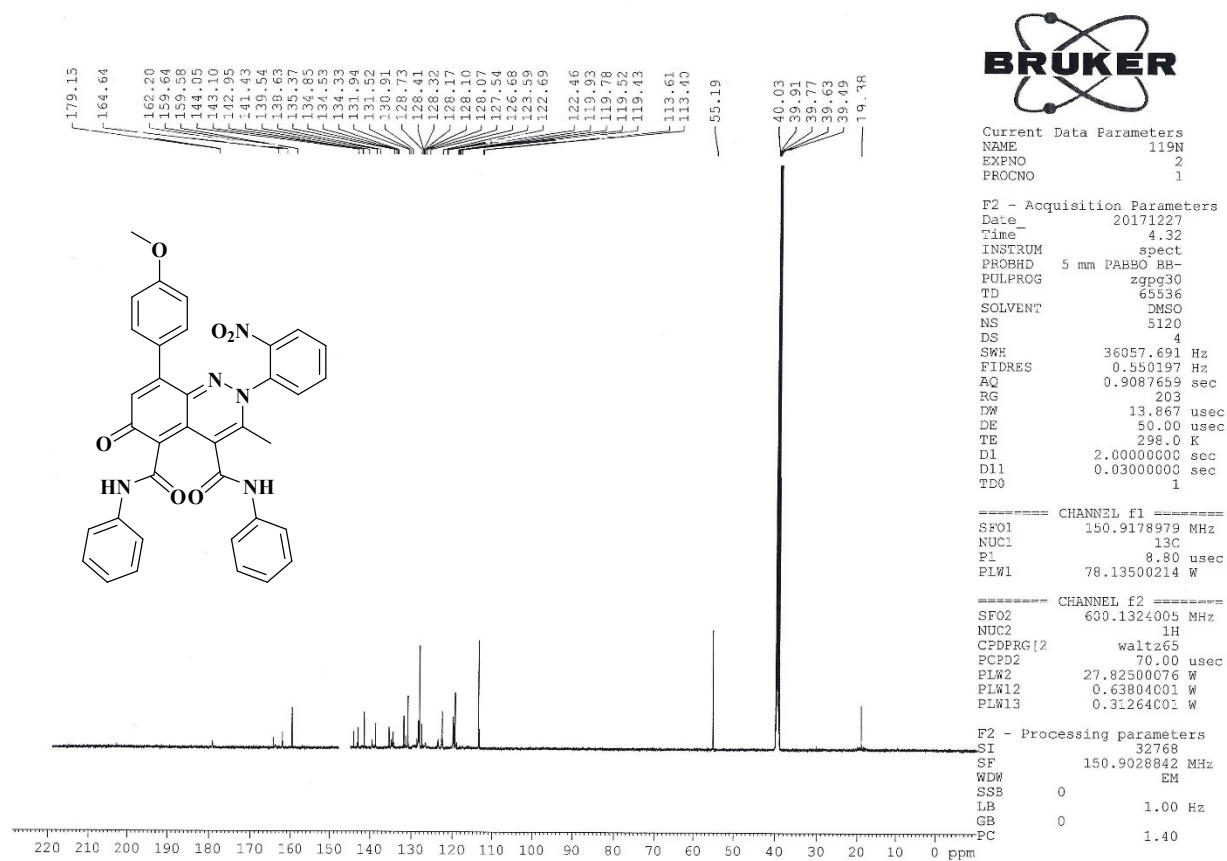

**<sup>13</sup>C NMR spectrum of compound 4l**

**2-(4-Chlorophenyl)-3-methyl-6-oxo-*N*<sup>4</sup>,*N*<sup>5</sup>,8-triphenyl-2,6-dihydrocinnoline-4,5-dicarboxamide  
(4m)**

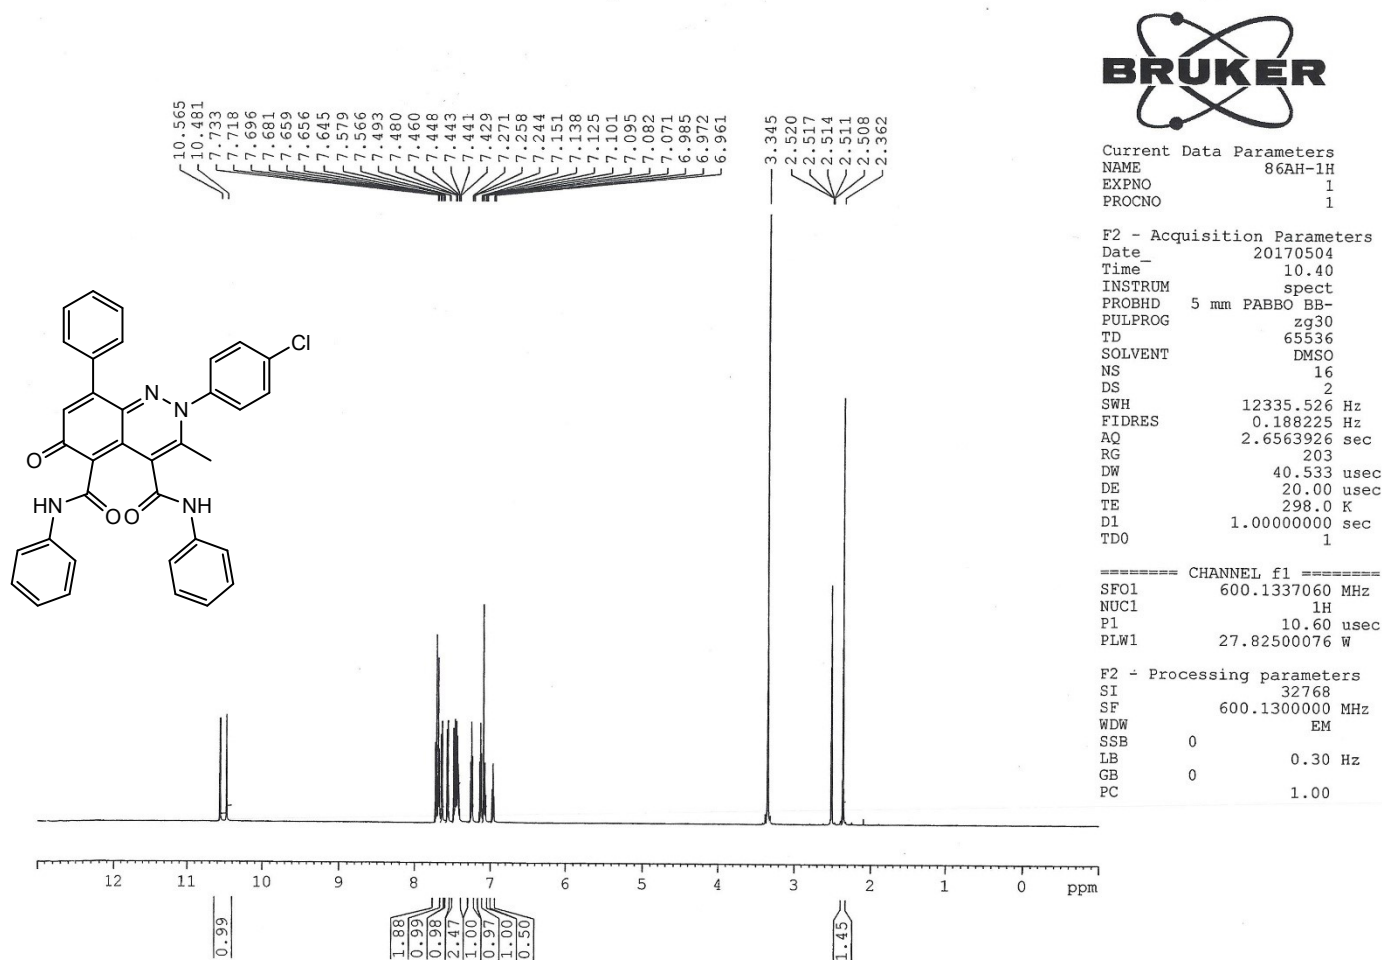

**<sup>1</sup>H NMR spectrum of compound 4m**

**2-(4-Chlorophenyl)-3-methyl-6-oxo-*N*<sup>4</sup>,*N*<sup>5</sup>,8-triphenyl-2,6-dihydrocinnoline-4,5-dicarboxamide (4m)**

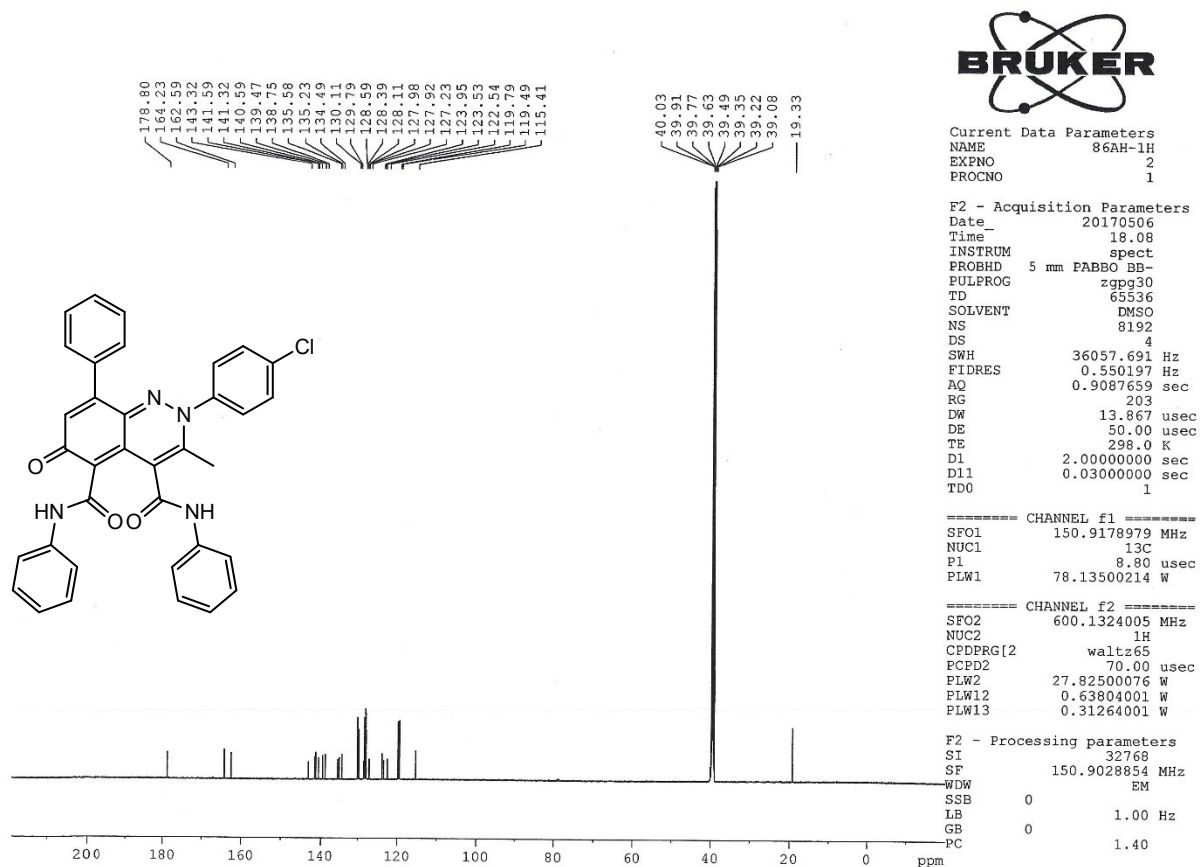

**<sup>13</sup>C NMR spectrum of compound 4m**

**2-(4-Bromophenyl)-3-methyl-6-oxo-*N*<sup>4</sup>,*N*<sup>5</sup>,8-triphenyl-2,6-dihydrocinnoline-4,5-dicarboxamide (4n)**

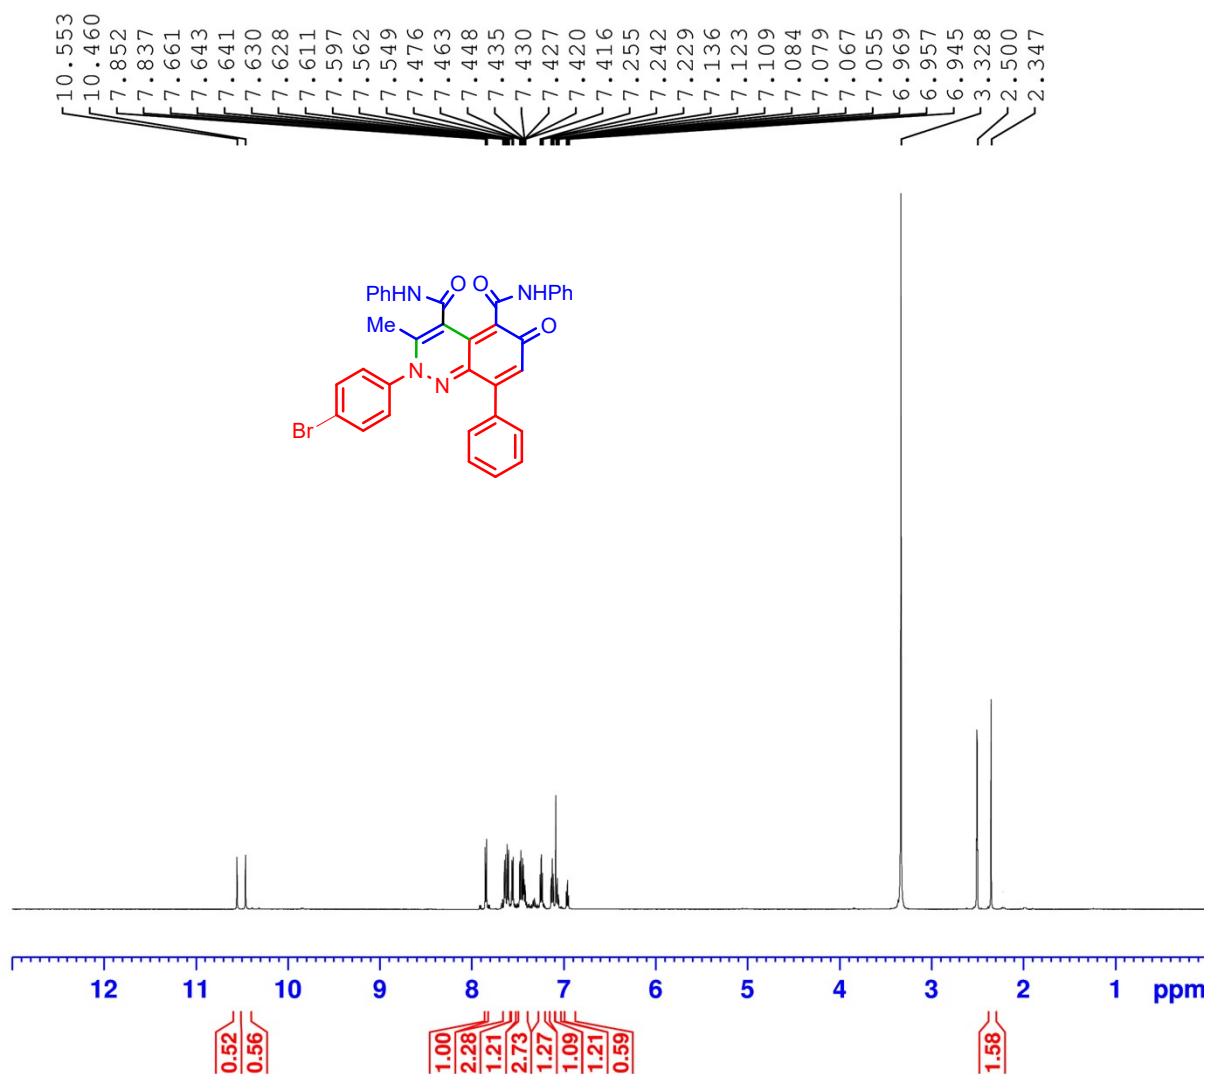

**<sup>1</sup>H NMR spectrum of compound 4n**

**2-(4-Bromophenyl)-3-methyl-6-oxo-*N*<sup>4</sup>,*N*<sup>5</sup>,8-triphenyl-2,6-dihydrocinnoline-4,5-dicarboxamide (4n)**

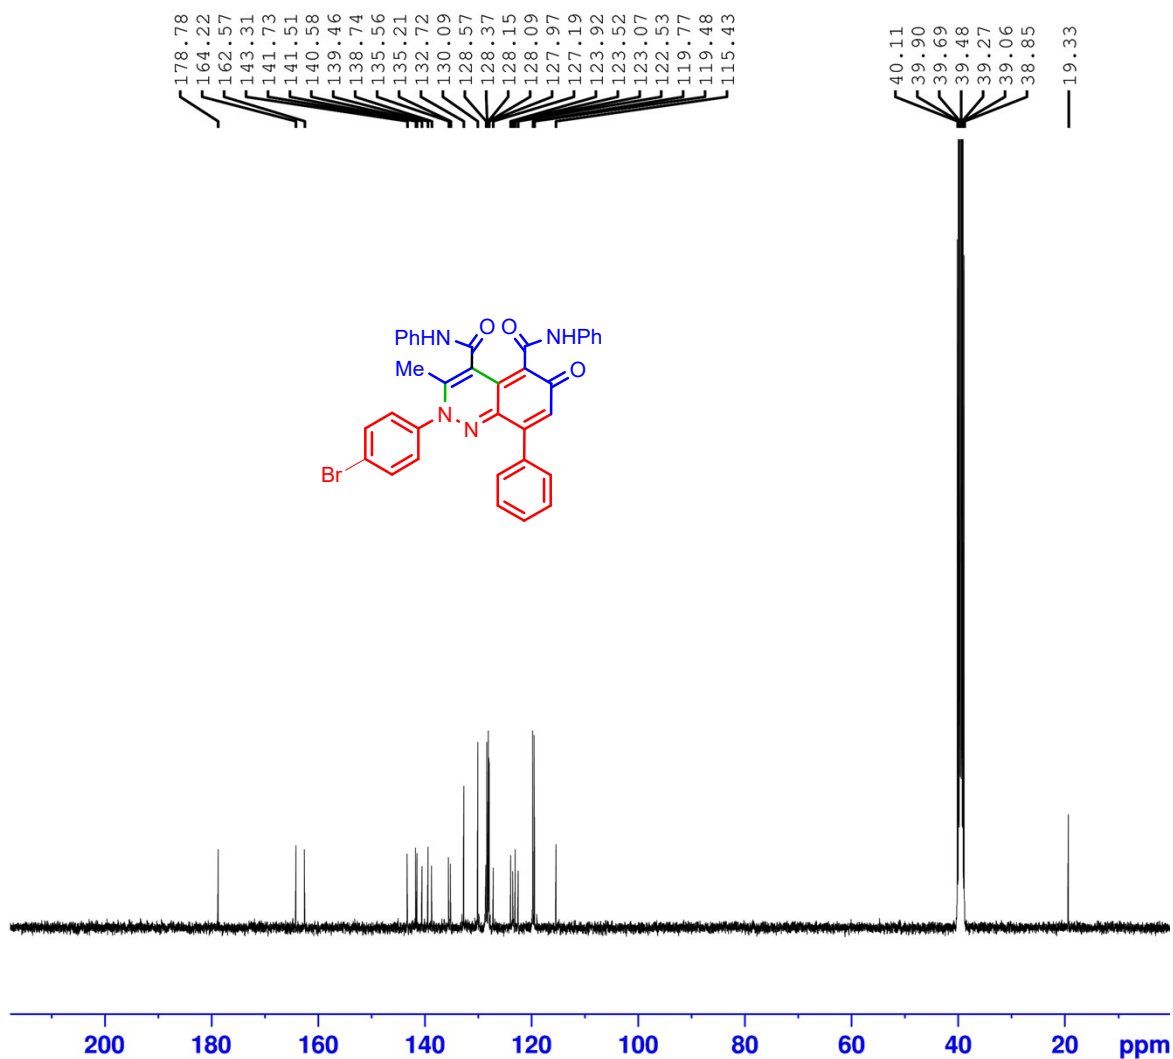

**<sup>13</sup>C NMR spectrum of compound 4n**

**2-(4-Bromophenyl)-3-methyl-6-oxo-*N*<sup>4</sup>,*N*<sup>5</sup>,8-triphenyl-2,6-dihydrocinnoline-4,5-dicarboxamide (4n)**

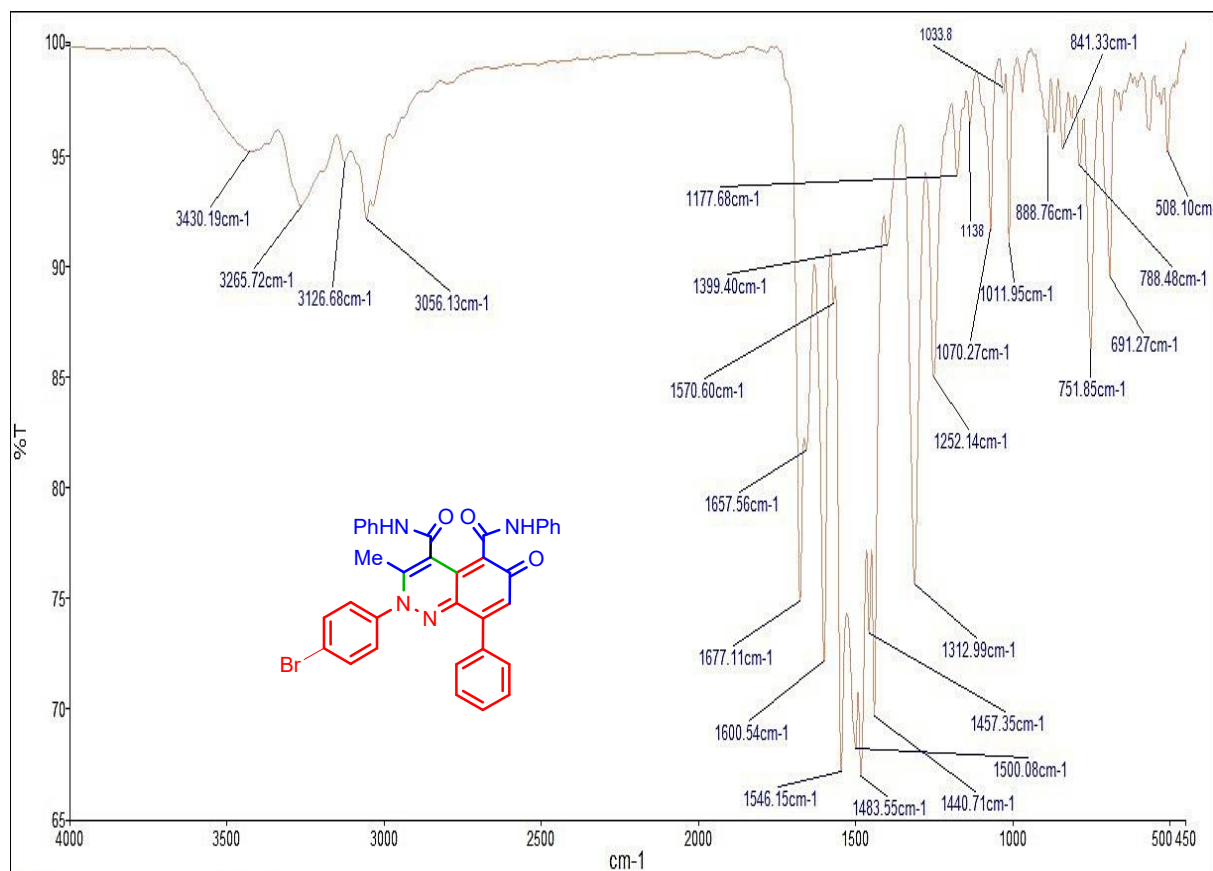

**FT-IR spectrum of compound 4d**

**3-Methyl-2-(2-nitrophenyl)-6-oxo-*N*<sup>4</sup>,*N*<sup>5</sup>,8-triphenyl-2,6-dihydrocinnoline-4,5-dicarboxamide (4o)**

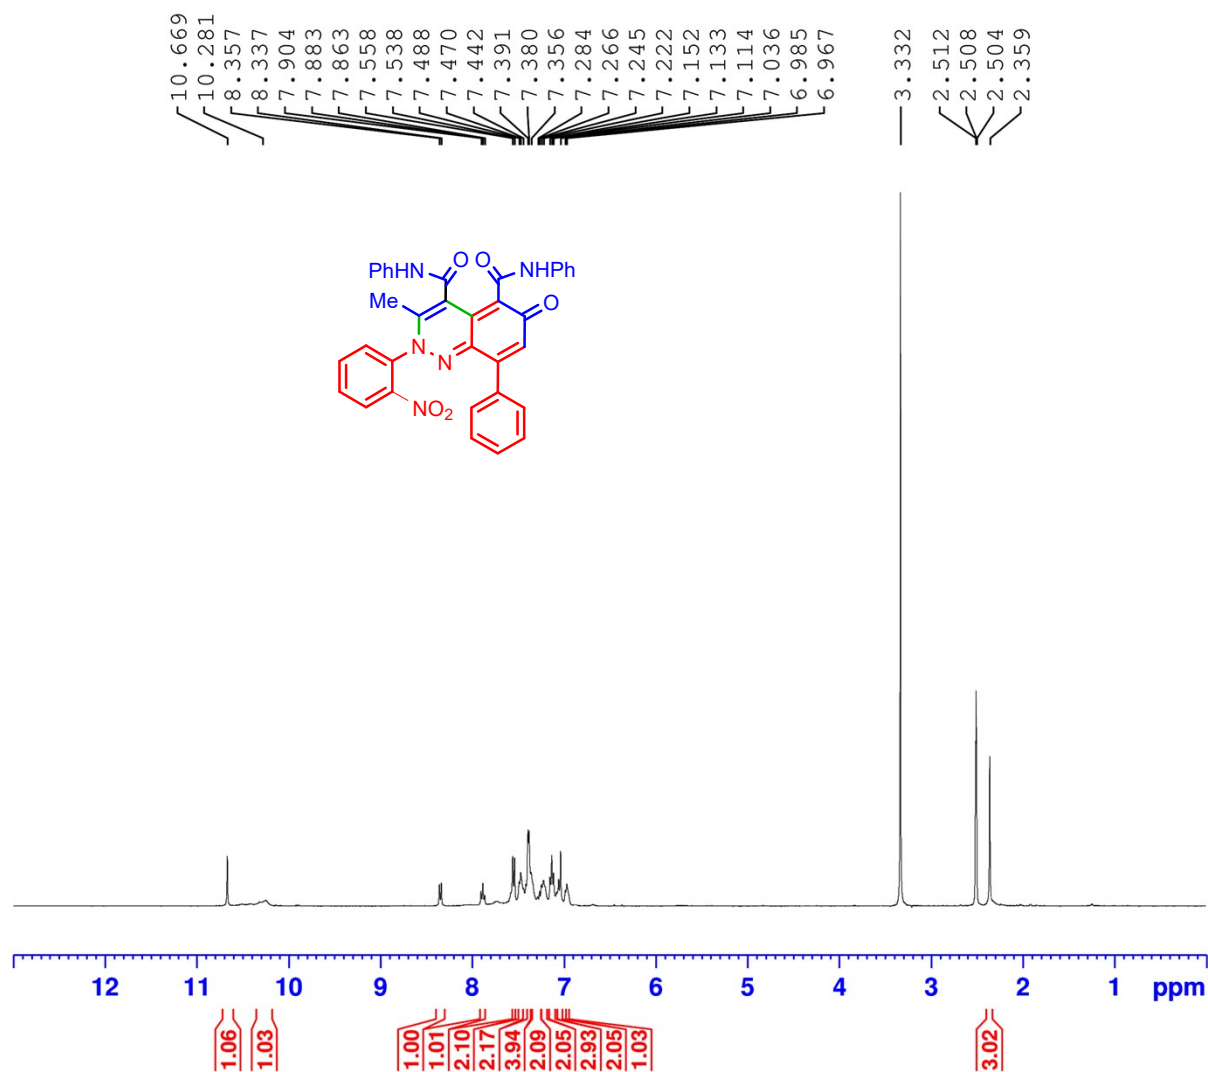

**<sup>1</sup>H NMR spectrum of compound 4o**

**3-Methyl-2-(2-nitrophenyl)-6-oxo-*N*<sup>4</sup>,*N*<sup>5</sup>,8-triphenyl-2,6-dihydrocinnoline-4,5-dicarboxamide (4o)**

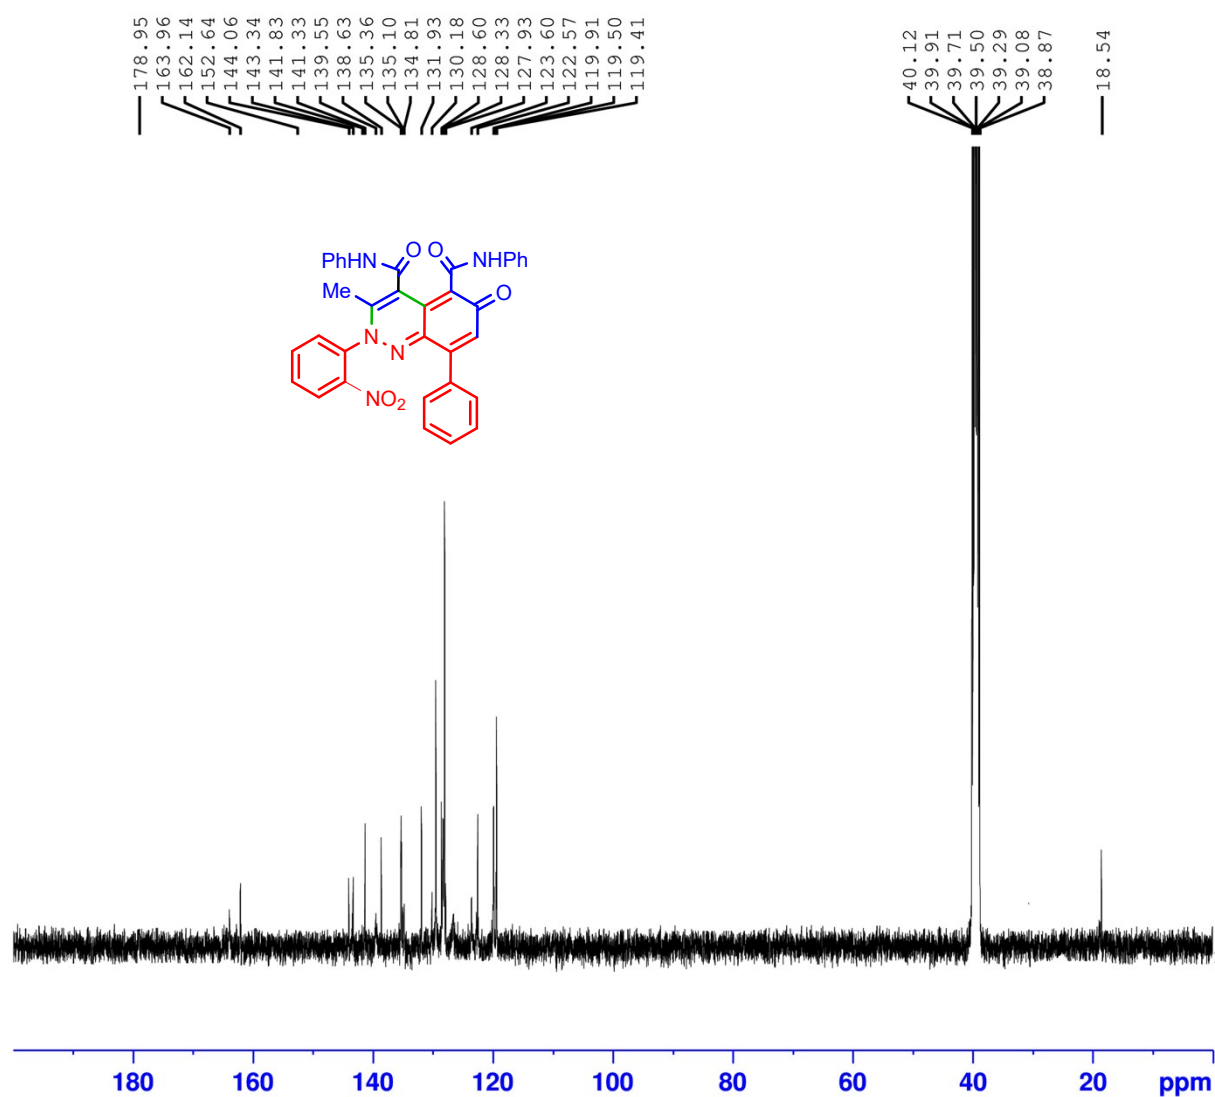

<sup>13</sup>C NMR spectrum of compound 4o

Chemical structure of compound 10: Cc1nc2c(nc(=O)Nc3ccccc3)c4cc(ccc4C(=O)Nc5ccccc5)[N+]([O-])c6ccccc16

IR spectrum (cm<sup>-1</sup>):

- 3435.50
- 3272.30
- 3129.44
- 3055.56
- 3022.17
- 1719.15
- 1660.63
- 1632.87
- 1603.48
- 1553.38
- 1530.84
- 1497.88
- 1446.47
- 1394.91
- 1379.26
- 1347.43
- 1303.26
- 1262.77
- 1226.77
- 1179.15
- 1155.34
- 1137.87
- 1070.34
- 1000.00
- 981.78
- 961.42
- 936.57
- 902.39
- 891.78
- 788.48
- 775.98
- 741.06
- 702.39

Page S74
